# Supplementary material
Source: PubMed Central journal article supplement (PMC2566789)
Supplement: NIHMS64110-supplement-1si20050829_12.pdf [file NIHMS64110-supplement-1si20050829_12.pdf]

## Supplementary Information

to the manuscript by Elena V. Batrakova, David L. Kelly, Shu Li, Yili Li, Zihui Yang, Li Xiao, Daria Y. Alakhova, Simon Sherman, Valery Yu. Alakhov and Alexander V. Kabanov "Alteration of Genomic Responses to Doxorubicin and Prevention of MDR in Breast Cancer Cells by a Polymer Excipient Pluronic P85"

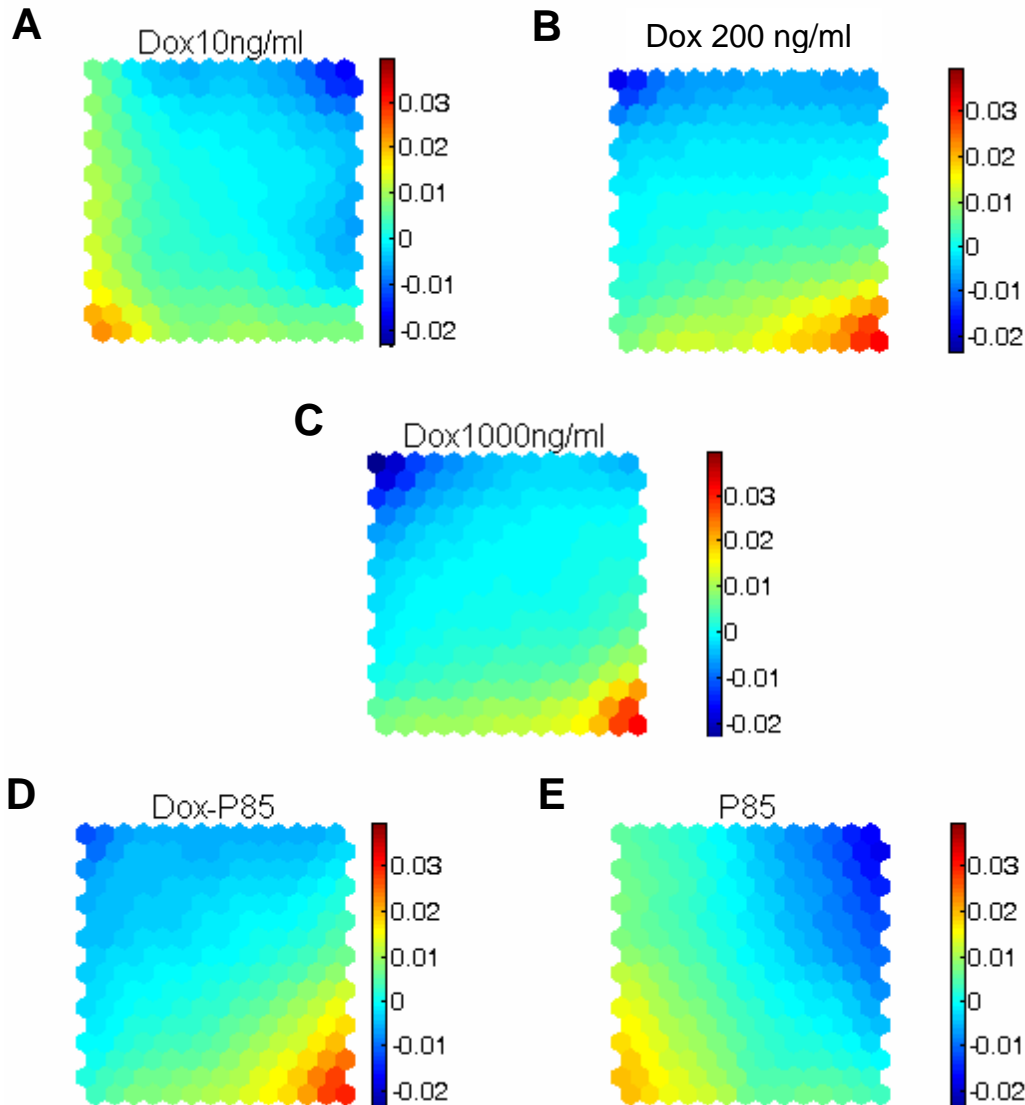

**Figure 5** SOM analysis of gene expression in (A) MCF7/Dox (10 ng/ml), (B) MCF7/Dox (200 ng/ml), (C) MCF7/Dox (1000 ng/ml), (D) MCF7/Dox-P85 and (E) MCF7/P85 cells. To increase the accuracy of the analysis, the data were first log<sub>2</sub> transformed and then centered by the median of each sample as described in Materials and Methods. The color code assigned to each unit represents normalized gene expression averaged for all the genes contained in this unit. The positive and negative values in the color bars correspond to the extent of increase (positive) or decrease (negative) in gene expression levels.

## SOM Labels

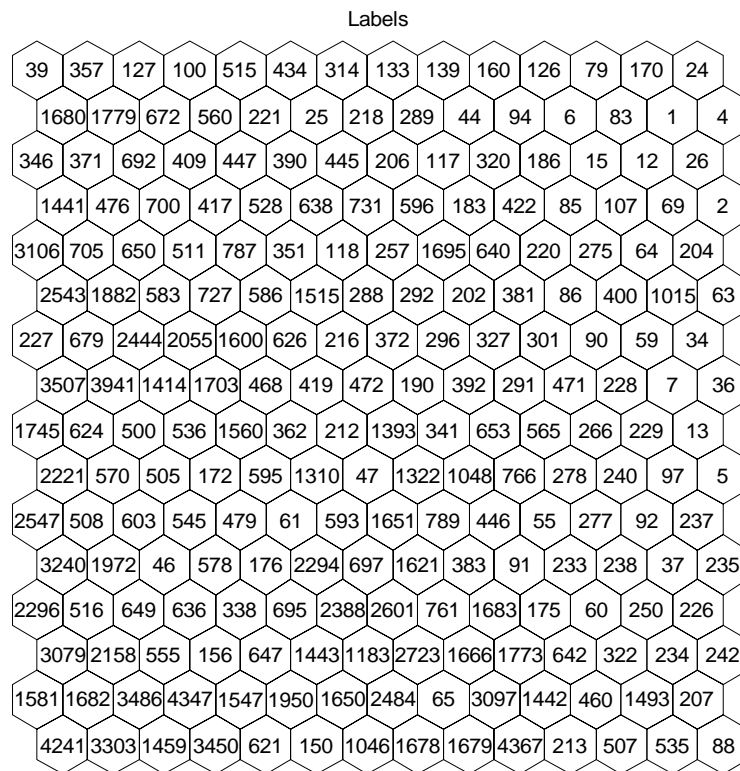

|      |       |      |       |       |       |      |       |      |
|------|-------|------|-------|-------|-------|------|-------|------|
| 39   | 1680  | 346  | 1441  | 3106  | 2543  | 227  | 3507  | 1745 |
| 39   | 1680  | 346  | 1441  | 3106  | 2543  | 227  | 3507  | 1745 |
| 251  | 4435  | 1726 | 1533  | 3176  | 2625  | 779  | 4400  | 2178 |
| 429  | 5382  | 1831 | 2029  | 4384  | 2931  | 1737 | 4416  | 2836 |
| 463  | 5647  | 1939 | 2904  | 4702  | 3121  | 1888 | 4602  | 3012 |
| 808  | 6462  | 2150 | 3005  | 4826  | 4261  | 1991 | 4632  | 3025 |
| 1137 | 6507  | 2181 | 4080  | 5527  | 4325  | 2824 | 5207  | 4090 |
| 1271 | 6570  | 2203 | 4251  | 5610  | 4433  | 2829 | 5249  | 4466 |
| 1358 | 7745  | 2918 | 5139  | 5684  | 4460  | 2837 | 5313  | 4646 |
| 1607 | 7853  | 3050 | 5149  | 5746  | 4500  | 2849 | 5449  | 4694 |
| 1758 | 7894  | 3103 | 5441  | 5754  | 4524  | 3065 | 5538  | 5254 |
| 1794 | 8141  | 3747 | 5509  | 6055  | 4691  | 3356 | 5559  | 5283 |
| 1990 | 8530  | 3803 | 5555  | 6123  | 4703  | 3528 | 5583  | 5416 |
| 2899 | 8588  | 4145 | 5560  | 6150  | 4737  | 3774 | 5858  | 5463 |
| 2908 | 8921  | 4162 | 5605  | 6165  | 4807  | 3908 | 5963  | 5473 |
| 2960 | 9030  | 4321 | 5688  | 6168  | 4851  | 4058 | 6108  | 5503 |
| 3045 | 9156  | 4322 | 5950  | 6331  | 5262  | 4060 | 6125  | 5617 |
| 3295 | 9296  | 4345 | 6001  | 6336  | 5328  | 4088 | 6338  | 5651 |
| 3453 | 9989  | 4462 | 6016  | 6434  | 5334  | 4126 | 6465  | 5772 |
| 3677 | 10062 | 4685 | 6352  | 6733  | 5366  | 4146 | 6483  | 5805 |
| 3706 | 10367 | 4705 | 6413  | 6746  | 5556  | 4213 | 6685  | 5979 |
| 3823 | 10428 | 4867 | 6457  | 6851  | 5999  | 4238 | 6727  | 5991 |
| 3824 | 10672 | 4890 | 6655  | 7331  | 6134  | 4240 | 6915  | 6082 |
| 3851 | 11275 | 4928 | 6780  | 7491  | 6574  | 4269 | 6939  | 6115 |
| 3978 | 11454 | 5035 | 6895  | 7560  | 6650  | 4390 | 7015  | 6249 |
| 4105 | 11663 | 5197 | 7006  | 7591  | 6654  | 4408 | 7094  | 6362 |
| 4150 | 12279 | 5219 | 7061  | 7663  | 6680  | 4410 | 7103  | 6589 |
| 4557 | 13169 | 5253 | 7105  | 7774  | 6773  | 4420 | 7146  | 6664 |
| 4863 | 13582 | 5477 | 7413  | 7942  | 6860  | 4463 | 7186  | 6668 |
| 5072 | 16237 | 5499 | 7501  | 7946  | 7401  | 4477 | 7530  | 6688 |
| 5187 | 16842 | 5622 | 7508  | 7974  | 7562  | 4534 | 7613  | 6791 |
| 5289 | 17149 | 5672 | 7537  | 8136  | 7596  | 4541 | 7860  | 6878 |
| 5442 | 17697 | 5712 | 7733  | 8229  | 7718  | 4563 | 7941  | 7197 |
| 5866 | 17699 | 5753 | 7775  | 8718  | 8072  | 4597 | 7980  | 7281 |
| 6030 |       | 5995 | 7779  | 8833  | 8144  | 4611 | 8065  | 7553 |
| 6154 |       | 6002 | 7837  | 8840  | 8206  | 4621 | 8087  | 7618 |
| 6222 |       | 6058 | 7906  | 9178  | 8918  | 4649 | 8287  | 7654 |
| 6324 |       | 6077 | 7976  | 9489  | 8964  | 4650 | 8372  | 7668 |
| 6853 |       | 6120 | 8032  | 9536  | 9094  | 4671 | 8477  | 7688 |
| 6926 |       | 6418 | 8324  | 9561  | 9128  | 4678 | 8882  | 7694 |
| 6990 |       | 6429 | 8355  | 9735  | 9359  | 4788 | 9159  | 7702 |
| 7037 |       | 6470 | 8575  | 11470 | 13673 | 4809 | 9224  | 7777 |
| 7046 |       | 6544 | 8880  | 11926 | 13699 | 4856 | 9371  | 7905 |
| 7137 |       | 6625 | 9186  | 12276 | 13758 | 5167 | 9391  | 7951 |
| 7304 |       | 6683 | 9463  | 12844 | 14363 | 5325 | 9427  | 7952 |
| 7404 |       | 6711 | 9569  | 13514 | 14414 | 5415 | 9600  | 8004 |
| 7405 |       | 6752 | 9794  | 14473 | 14661 | 5452 | 9611  | 8008 |
| 7452 |       | 6947 | 10804 | 14481 | 14742 | 5516 | 12047 | 8390 |
| 7641 |       | 6956 | 10842 | 14630 | 15329 | 5530 | 12775 | 8451 |
| 7684 |       | 7593 | 11353 | 14685 | 15394 | 5633 | 13067 | 8463 |
| 7847 |       | 7795 | 11529 | 14921 | 15524 | 5654 | 14218 | 8507 |
| 7863 |       | 7943 | 11614 | 15040 | 15815 | 5655 | 14242 | 8514 |

|       |       |       |       |       |      |       |       |
|-------|-------|-------|-------|-------|------|-------|-------|
| 7911  | 7955  | 11813 | 15163 | 15853 | 5674 | 14352 | 8546  |
| 7920  | 8081  | 12116 | 15231 | 16308 | 5678 | 14430 | 8570  |
| 7930  | 8240  | 12469 | 15285 | 17429 | 5686 | 14650 | 8630  |
| 8104  | 8302  | 12616 | 15308 | 18038 | 5728 | 15429 | 8672  |
| 8337  | 8333  | 12963 | 15801 | 18881 | 5738 | 15486 | 8737  |
| 8501  | 8415  | 13554 | 15938 | 18936 | 5745 | 15515 | 9102  |
| 8654  | 8459  | 13574 | 16207 | 18971 | 5758 | 15553 | 9184  |
| 8676  | 8652  | 14222 | 16267 | 19025 | 5761 | 15628 | 9269  |
| 8871  | 8717  | 15177 | 16735 | 19032 | 5766 | 15697 | 9392  |
| 9070  | 8800  | 15539 | 16897 | 19177 | 5768 | 15857 | 9421  |
| 9256  | 8810  | 15829 | 17013 |       | 5846 | 15879 | 9540  |
| 9285  | 8854  | 15887 | 17128 |       | 5876 | 15914 | 9552  |
| 9312  | 8916  | 15973 | 17155 |       | 5879 | 15994 | 10333 |
| 9348  | 8997  | 16192 | 17213 |       | 5885 | 16139 | 10587 |
| 9423  | 9049  | 16658 | 17772 |       | 5888 | 17048 | 11380 |
| 9755  | 9280  | 16818 | 17854 |       | 5910 | 17127 | 11419 |
| 9793  | 9374  | 17850 | 18074 |       | 5935 | 17350 | 11511 |
| 9819  | 9629  | 17855 | 18433 |       | 5943 | 17525 | 12689 |
| 9932  | 9730  | 17866 | 19000 |       | 5947 | 17752 | 12714 |
| 10318 | 9845  | 18835 | 19023 |       | 5983 | 17966 | 12716 |
| 10359 | 9931  | 18979 | 19043 |       | 5990 | 18014 | 12736 |
| 10422 | 10453 | 18992 |       |       | 5997 | 18480 | 12923 |
| 10545 | 11361 | 19153 |       |       | 6006 | 18483 | 13654 |
| 10591 | 11424 |       |       |       | 6019 | 18543 | 13671 |
| 10607 | 11567 |       |       |       | 6035 | 18693 | 13710 |
| 10785 | 11910 |       |       |       | 6036 | 19007 | 13736 |
| 10860 | 11940 |       |       |       | 6056 | 19083 | 13780 |
| 11149 | 11947 |       |       |       | 6063 | 19119 | 13787 |
| 11246 | 12189 |       |       |       | 6069 | 19163 | 13815 |
| 11331 | 12225 |       |       |       | 6075 |       | 14302 |
| 11395 | 12622 |       |       |       | 6079 |       | 14369 |
| 11411 | 12730 |       |       |       | 6087 |       | 14433 |
| 11455 | 12863 |       |       |       | 6090 |       | 14436 |
| 11457 | 12970 |       |       |       | 6100 |       | 14477 |
| 11481 | 13011 |       |       |       | 6109 |       | 14614 |
| 11504 | 13679 |       |       |       | 6114 |       | 15281 |
| 11915 | 14088 |       |       |       | 6137 |       | 15351 |
| 12217 | 14268 |       |       |       | 6164 |       | 15372 |
| 12263 | 14474 |       |       |       | 6172 |       | 15380 |
| 12681 | 14794 |       |       |       | 6176 |       | 15735 |
| 12885 | 15309 |       |       |       | 6191 |       | 15739 |
| 12889 | 15357 |       |       |       | 6193 |       | 15760 |
| 12981 | 15523 |       |       |       | 6205 |       | 15882 |
| 12989 | 16218 |       |       |       | 6229 |       | 15985 |
| 13021 | 16329 |       |       |       | 6252 |       | 16080 |
| 13083 | 16779 |       |       |       | 6259 |       | 16437 |
| 13561 | 16786 |       |       |       | 6261 |       | 16789 |
| 13827 | 16940 |       |       |       | 6294 |       | 17008 |
| 13967 | 17039 |       |       |       | 6342 |       | 17045 |
| 13985 | 17130 |       |       |       | 6354 |       | 17280 |
| 14470 | 17168 |       |       |       | 6358 |       | 17557 |
| 14573 | 17272 |       |       |       | 6460 |       | 17585 |

|       |       |      |       |
|-------|-------|------|-------|
| 14848 | 17419 | 6464 | 17652 |
| 15322 | 17732 | 6482 | 17659 |
| 15399 | 17783 | 6504 | 17705 |
| 15509 | 17920 | 6508 | 17757 |
| 15586 | 18287 | 6510 | 17846 |
| 16072 |       | 6520 | 18341 |
| 16208 |       | 6521 | 18423 |
| 16230 |       | 6527 | 18426 |
| 16357 |       | 6545 | 18546 |
| 16524 |       | 6553 | 18572 |
| 17608 |       | 6554 | 18634 |
| 18015 |       | 6555 | 18667 |
|       |       | 6563 | 18685 |
|       |       | 6568 | 18742 |
|       |       | 6579 | 18750 |
|       |       | 6617 | 18805 |
|       |       | 6628 | 19079 |
|       |       | 6653 | 19120 |
|       |       | 6656 | 19132 |
|       |       | 6717 |       |
|       |       | 6728 |       |
|       |       | 6854 |       |
|       |       | 6866 |       |
|       |       | 6872 |       |
|       |       | 6921 |       |
|       |       | 6922 |       |
|       |       | 6948 |       |
|       |       | 6963 |       |
|       |       | 7086 |       |
|       |       | 7100 |       |
|       |       | 7161 |       |
|       |       | 7193 |       |
|       |       | 7204 |       |
|       |       | 7265 |       |
|       |       | 7298 |       |
|       |       | 7336 |       |
|       |       | 7354 |       |
|       |       | 7356 |       |
|       |       | 7373 |       |
|       |       | 7383 |       |
|       |       | 7392 |       |
|       |       | 7490 |       |
|       |       | 7511 |       |
|       |       | 7546 |       |
|       |       | 7551 |       |
|       |       | 7567 |       |
|       |       | 7605 |       |
|       |       | 7739 |       |
|       |       | 7747 |       |
|       |       | 7748 |       |
|       |       | 7749 |       |
|       |       | 7789 |       |

7806  
7881  
7902  
7922  
7956  
7965  
7971  
7989  
8043  
8088  
8142  
8174  
8197  
8214  
8247  
8254  
8284  
8342  
8349  
8429  
8438  
8470  
8506  
8513  
8592  
8749  
8815  
8827  
8838  
8844  
8860  
8862  
8865  
8867  
8893  
8922  
8949  
9072  
9111  
9155  
9183  
9187  
9192  
9193  
9236  
9247  
9264  
9276  
9303  
9325  
9358  
9367

9393  
9412  
9851  
9901  
10402  
10555  
10655  
12493  
12812  
13299  
13667  
14338  
14360  
14421  
14442  
14479  
14520  
14750  
14809  
15209  
15219  
15292  
15319  
15320  
15326  
15341  
15373  
15485  
15491  
15516  
15518  
15544  
15552  
15658  
15721  
15744  
15854  
15946  
16033  
16131  
16181  
16233  
16312  
16332  
16397  
16646  
16860  
16958  
16983  
17032  
17068  
17099

17160  
17211  
17295  
17332  
17465  
17468  
17490  
17555  
17556  
17575  
17582  
17637  
17638  
17644  
17649  
17681  
17941  
17962  
18320  
18321  
18381  
18400  
18449  
18485  
18530  
18542  
18569  
18570  
18599  
18605  
18606  
18616  
18623  
18627  
18631  
18653  
18660  
18689  
18694  
18716  
18758  
18777  
18806  
18856  
18880  
18889  
18912  
18967  
18968  
18970  
19026  
19051



19085  
19113  
19138  
19148

| 2221  | 2547  | 3240  | 2296  | 3079  | 1581  | 4241  | 357   | 1779  |
|-------|-------|-------|-------|-------|-------|-------|-------|-------|
| 2221  | 2547  | 3240  | 2296  | 3079  | 1581  | 4241  | 357   | 1779  |
| 3327  | 2690  | 3700  | 2463  | 3917  | 2215  | 4342  | 656   | 1815  |
| 5180  | 3042  | 4609  | 4079  | 4455  | 3773  | 5456  | 762   | 2179  |
| 5445  | 3667  | 5101  | 4329  | 4734  | 4158  | 5549  | 1265  | 3210  |
| 5474  | 4506  | 5750  | 4378  | 5246  | 4415  | 6052  | 1478  | 3615  |
| 6010  | 5502  | 5856  | 4779  | 5553  | 4683  | 6209  | 1838  | 4131  |
| 6128  | 5644  | 6868  | 5273  | 6027  | 4684  | 6302  | 2461  | 4915  |
| 6287  | 5791  | 7245  | 5312  | 6931  | 5825  | 6314  | 2998  | 4935  |
| 6786  | 5977  | 7690  | 5587  | 7128  | 6013  | 6488  | 4097  | 5231  |
| 6886  | 6113  | 8066  | 5702  | 7211  | 6762  | 6832  | 5157  | 5769  |
| 7670  | 6344  | 8396  | 5717  | 7345  | 6938  | 6840  | 5358  | 5802  |
| 8040  | 6397  | 8617  | 6023  | 7633  | 6985  | 6892  | 5911  | 6122  |
| 8460  | 6480  | 8621  | 6334  | 7889  | 7915  | 7184  | 6116  | 6514  |
| 8483  | 6690  | 8625  | 6820  | 7990  | 8041  | 7925  | 6918  | 7453  |
| 8490  | 6833  | 8642  | 6916  | 8148  | 8504  | 7933  | 6993  | 7649  |
| 8508  | 6965  | 8656  | 7004  | 8385  | 8935  | 8895  | 7257  | 7855  |
| 8715  | 6966  | 8707  | 7125  | 8496  | 11407 | 9136  | 7519  | 8074  |
| 8792  | 7011  | 8719  | 7370  | 8603  | 12262 | 12222 | 7626  | 9119  |
| 8793  | 7122  | 8886  | 7732  | 8687  | 12908 | 12252 | 7648  | 10103 |
| 9175  | 7244  | 9505  | 8143  | 8712  | 13022 | 12828 | 7650  | 10339 |
| 9202  | 7274  | 12440 | 8243  | 8885  | 13142 | 13040 | 7893  | 11278 |
| 9215  | 7308  | 12915 | 8417  | 12437 | 13549 | 13052 | 8150  | 11280 |
| 9328  | 7547  | 12990 | 8511  | 12623 | 13817 | 13062 | 8335  | 11282 |
| 9476  | 7737  | 13065 | 8601  | 13762 | 13873 | 13063 | 8556  | 11339 |
| 9501  | 7845  | 13820 | 8657  | 13954 | 13879 | 13556 | 8744  | 11480 |
| 9530  | 7944  | 13877 | 8681  | 13989 | 13929 | 13588 | 9462  | 11575 |
| 9531  | 7953  | 14344 | 9203  | 14617 | 14047 | 13730 | 9469  | 11912 |
| 9593  | 8026  | 14670 | 9207  | 14679 | 14366 | 13846 | 9687  | 11920 |
| 11412 | 8445  | 14755 | 9225  | 14749 | 14377 | 13862 | 9955  | 12341 |
| 12850 | 8453  | 14879 | 9396  | 14765 | 14559 | 14334 | 10046 | 13012 |
| 13270 | 8585  | 15338 | 9415  | 15284 | 15051 | 14371 | 10302 | 13128 |
| 13724 | 8644  | 15476 | 9471  | 15344 | 15266 | 14422 | 10599 | 14603 |
| 14133 | 8667  | 15900 | 9680  | 15365 | 15279 | 14447 | 10610 | 14611 |
| 14196 | 8673  | 16026 | 10417 | 15383 | 15283 | 14558 | 11514 | 15577 |
| 14490 | 8677  | 16732 | 10729 | 15966 | 15325 | 14854 | 11930 | 16172 |
| 15352 | 8703  | 16970 | 13017 | 16007 | 15368 | 14886 | 12122 | 16488 |
| 15538 | 8729  | 17401 | 13036 | 16029 | 15369 | 15264 | 12843 | 16787 |
| 16002 | 8781  | 17439 | 13058 | 16265 | 15371 | 15288 | 13275 | 17565 |
| 17087 | 8782  | 17457 | 13081 | 16393 | 15430 | 15310 | 13445 |       |
| 17410 | 8797  | 17486 | 13132 | 16978 | 15454 | 15336 | 13810 |       |
| 17441 | 8801  | 17518 | 13282 | 17067 | 15456 | 15340 | 14448 |       |
| 17460 | 9071  | 17571 | 13617 | 17117 | 15468 | 15347 | 15175 |       |
| 17594 | 9301  | 18461 | 13729 | 17148 | 15514 | 15348 | 16557 |       |
| 18019 | 9504  | 18557 | 13818 | 17204 | 15571 | 15353 | 17678 |       |
| 18428 | 11601 | 18564 | 13875 | 17210 | 15572 | 15363 | 17764 |       |
| 18486 | 12395 | 18720 | 14054 | 17251 | 15681 | 15398 | 18961 |       |
| 18591 | 12462 | 18851 | 14058 | 17328 | 15944 | 15405 |       |       |
| 18999 | 12815 | 19027 | 14076 | 17520 | 15971 | 15414 |       |       |
| 19050 | 12852 | 19147 | 14079 | 17668 | 15997 | 15448 |       |       |
| 19169 | 12876 |       | 14396 | 17691 | 16053 | 15452 |       |       |
|       | 12907 |       | 14530 | 17738 | 16243 | 15455 |       |       |

|       |       |       |       |       |
|-------|-------|-------|-------|-------|
| 13209 | 14654 | 17744 | 16370 | 15511 |
| 13737 | 14709 | 17833 | 16406 | 15512 |
| 13789 | 15261 | 17849 | 16456 | 15596 |
| 13908 | 15304 | 17853 | 16893 | 15609 |
| 13955 | 15311 | 18313 | 16947 | 15619 |
| 13991 | 15427 | 18421 | 16951 | 15620 |
| 14023 | 15449 | 18674 | 16994 | 15635 |
| 14050 | 15460 | 18766 | 17125 | 15653 |
| 14161 | 15475 | 19055 | 17144 | 15711 |
| 14244 | 15483 |       | 17153 | 15719 |
| 14494 | 15602 |       | 17183 | 15937 |
| 14532 | 15625 |       | 17202 | 15941 |
| 14561 | 15626 |       | 17239 | 15967 |
| 14618 | 15683 |       | 17262 | 16021 |
| 14619 | 15716 |       | 17264 | 16040 |
| 14702 | 15917 |       | 17267 | 16049 |
| 14822 | 15958 |       | 17326 | 16136 |
| 15276 | 15991 |       | 17347 | 16273 |
| 15339 | 15993 |       | 17597 | 16305 |
| 15366 | 16001 |       | 17602 | 16420 |
| 15397 | 16030 |       | 17687 | 16883 |
| 15428 | 16031 |       | 17709 | 16910 |
| 15488 | 16051 |       | 17727 | 16938 |
| 15685 | 16100 |       | 17743 | 17006 |
| 15771 | 16115 |       | 17787 | 17009 |
| 15927 | 16125 |       | 17789 | 17046 |
| 16003 | 16281 |       | 17893 | 17118 |
| 16366 | 16487 |       | 17988 | 17121 |
| 16770 | 16625 |       | 18293 | 17135 |
| 16803 | 16747 |       | 18397 | 17287 |
| 16885 | 16891 |       | 18460 | 17305 |
| 16957 | 16892 |       | 18525 | 17452 |
| 16976 | 16894 |       | 18538 | 17517 |
| 16981 | 16903 |       | 18544 | 17548 |
| 17044 | 16918 |       | 18624 | 17588 |
| 17051 | 16949 |       | 18630 | 17655 |
| 17066 | 16950 |       | 18682 | 17689 |
| 17095 | 17064 |       | 18692 | 17771 |
| 17124 | 17065 |       | 18708 | 17813 |
| 17231 | 17083 |       | 18741 | 17816 |
| 17298 | 17142 |       | 18786 | 17828 |
| 17464 | 17154 |       | 18997 | 17919 |
| 17498 | 17242 |       | 19048 | 17937 |
| 17499 | 17268 |       | 19084 | 17983 |
| 17546 | 17337 |       | 19107 | 18042 |
| 17549 | 17487 |       | 19165 | 18265 |
| 17580 | 17521 |       |       | 18414 |
| 17611 | 17572 |       |       | 18419 |
| 17642 | 17576 |       |       | 18465 |
| 17746 | 17612 |       |       | 18487 |
| 18193 | 17615 |       |       | 18490 |
| 18236 | 17645 |       |       | 18524 |

|       |       |       |
|-------|-------|-------|
| 18322 | 17662 | 18573 |
| 18404 | 18047 | 18655 |
| 18422 | 18289 | 18669 |
| 18513 | 18349 | 18678 |
| 18601 | 18390 | 18733 |
| 18659 | 18457 | 18738 |
| 18698 | 18484 | 18753 |
| 18705 | 18511 | 19082 |
| 18770 | 18516 | 19112 |
| 18771 | 18600 |       |
| 18920 | 18604 |       |
| 18974 | 18636 |       |
| 19036 | 18637 |       |
| 19058 | 18648 |       |
| 19087 | 18676 |       |
| 19108 | 18723 |       |
| 19136 | 18726 |       |
| 19167 | 18744 |       |
|       | 18810 |       |
|       | 18813 |       |
|       | 18837 |       |
|       | 18857 |       |
|       | 19090 |       |
|       | 19109 |       |
|       | 19154 |       |

| 371   | 476   | 705   | 1882 | 679  | 3941 | 624   | 570  | 508   |
|-------|-------|-------|------|------|------|-------|------|-------|
| 371   | 476   | 705   | 1882 | 679  | 3941 | 624   | 570  | 508   |
| 772   | 699   | 2087  | 1919 | 2154 | 4438 | 658   | 589  | 2238  |
| 928   | 2019  | 3064  | 1962 | 2302 | 4456 | 1765  | 669  | 2370  |
| 2108  | 5007  | 3194  | 3578 | 2303 | 5037 | 4172  | 703  | 3481  |
| 2191  | 5332  | 4391  | 3583 | 3585 | 5255 | 4515  | 1556 | 4271  |
| 2194  | 5433  | 4925  | 4037 | 4089 | 5271 | 4712  | 1949 | 4432  |
| 2405  | 5434  | 5307  | 4062 | 4124 | 5304 | 5481  | 2026 | 4444  |
| 3072  | 5591  | 5349  | 4182 | 4212 | 5387 | 5614  | 2090 | 4700  |
| 3446  | 5945  | 5799  | 4262 | 4253 | 5703 | 5857  | 2176 | 4834  |
| 3739  | 6288  | 5942  | 4424 | 4387 | 5798 | 6815  | 2786 | 5520  |
| 3879  | 6343  | 6178  | 4570 | 4440 | 5880 | 7059  | 4350 | 5649  |
| 3951  | 6406  | 6190  | 4669 | 4446 | 6026 | 7279  | 4434 | 5994  |
| 4360  | 6624  | 6875  | 4846 | 4458 | 6031 | 7337  | 4532 | 6065  |
| 4376  | 6627  | 6949  | 5069 | 4949 | 6042 | 8010  | 4661 | 6089  |
| 4892  | 6657  | 7156  | 5169 | 5125 | 6060 | 8435  | 5233 | 6652  |
| 4913  | 6950  | 7753  | 5280 | 5257 | 6346 | 8723  | 5260 | 7267  |
| 4989  | 7058  | 7805  | 5323 | 5355 | 6639 | 8765  | 5350 | 7628  |
| 5215  | 7266  | 8090  | 5329 | 5476 | 6643 | 8901  | 5381 | 7652  |
| 5243  | 7477  | 8479  | 5351 | 5537 | 6689 | 9176  | 5428 | 7669  |
| 6147  | 7642  | 11269 | 5357 | 5586 | 6754 | 9473  | 5618 | 7723  |
| 6408  | 7667  | 11337 | 5361 | 5615 | 6771 | 9525  | 5619 | 7935  |
| 6447  | 7892  | 13336 | 5451 | 5620 | 6783 | 11501 | 5820 | 8280  |
| 6646  | 7927  | 13593 | 5517 | 5751 | 7098 | 12268 | 5884 | 8332  |
| 6945  | 7932  | 13897 | 5518 | 5757 | 7160 | 12368 | 6239 | 8650  |
| 7088  | 8086  | 14105 | 5534 | 5851 | 7198 | 12411 | 6299 | 8697  |
| 7771  | 8100  | 15770 | 5541 | 5967 | 7255 | 12448 | 6594 | 8726  |
| 7773  | 8274  | 16244 | 5601 | 5970 | 7317 | 12805 | 6703 | 8730  |
| 8154  | 8783  | 16261 | 5624 | 6068 | 7402 | 13756 | 6792 | 9117  |
| 8423  | 10718 | 16480 | 5636 | 6080 | 7603 | 14189 | 7107 | 9205  |
| 8798  | 11465 | 17003 | 5716 | 6095 | 7617 | 14276 | 7234 | 9233  |
| 9472  | 11628 | 17150 | 5918 | 6118 | 7619 | 14367 | 7273 | 9258  |
| 9732  | 11973 | 17299 | 5948 | 6198 | 7715 | 14628 | 7353 | 9555  |
| 10053 | 12658 | 17449 | 5998 | 6203 | 7756 | 15510 | 7759 | 11453 |
| 10579 | 12816 | 17722 | 6153 | 6329 | 7785 | 17402 | 7875 | 11984 |
| 11312 | 13137 | 17741 | 6223 | 6528 | 7859 | 17539 | 7993 | 12003 |
| 11532 | 13139 | 18029 | 6243 | 6548 | 7907 | 17837 | 8044 | 12758 |
| 11559 | 13279 |       | 6630 | 6556 | 7940 | 18378 | 8363 | 12891 |
| 11702 | 13358 |       | 6697 | 6559 | 8058 | 18431 | 8440 | 13168 |
| 12209 | 13545 |       | 6804 | 6819 | 8211 | 18740 | 8486 | 13180 |
| 12294 | 13621 |       | 6845 | 6976 | 8289 | 19059 | 8510 | 13294 |
| 12800 | 14160 |       | 6955 | 6988 | 8398 | 19145 | 8536 | 13902 |
| 13111 | 14542 |       | 7007 | 7222 | 8484 |       | 8639 | 14528 |
| 13523 | 14824 |       | 7095 | 7347 | 8531 |       | 8640 | 14657 |
| 13750 | 15080 |       | 7101 | 7384 | 8561 |       | 8666 | 15389 |
| 13811 | 15860 |       | 7231 | 7437 | 8721 |       | 8678 | 16361 |
| 13856 | 15947 |       | 7271 | 7460 | 8774 |       | 8701 | 16581 |
| 14462 | 16477 |       | 7301 | 7478 | 8975 |       | 8769 | 16712 |
| 14539 | 16522 |       | 7627 | 7621 | 9004 |       | 8967 | 16799 |
| 14667 | 16628 |       | 7682 | 7632 | 9103 |       | 9058 | 16806 |
| 15282 | 16796 |       | 7691 | 7655 | 9115 |       | 9121 | 17361 |
| 16445 | 17071 |       | 7717 | 7726 | 9274 |       | 9288 | 17485 |

|       |       |       |       |       |       |       |
|-------|-------|-------|-------|-------|-------|-------|
| 16534 | 17212 | 7817  | 7804  | 9349  | 9398  | 17505 |
| 18215 | 17269 | 7884  | 7818  | 9370  | 9407  | 17564 |
|       | 17288 | 8235  | 7836  | 9385  | 9456  | 17651 |
|       | 17475 | 8755  | 7877  | 9490  | 9465  | 17695 |
|       | 17519 | 8805  | 7917  | 9567  | 9560  | 17726 |
|       | 17839 | 9118  | 7947  | 9571  | 9572  | 18012 |
|       | 17959 | 9222  | 7950  | 11432 | 9594  | 18152 |
|       | 18472 | 9533  | 8107  | 12284 | 9731  | 18246 |
|       | 19122 | 9591  | 8195  | 12737 | 9850  | 18274 |
|       |       | 11107 | 8351  | 13273 | 10658 | 18382 |
|       |       | 12386 | 8790  | 13863 | 11717 | 18477 |
|       |       | 12739 | 8828  | 14011 | 12132 | 18518 |
|       |       | 13594 | 8869  | 14165 | 12583 | 18921 |
|       |       | 14304 | 9148  | 14306 | 12956 | 18965 |
|       |       | 14478 | 9169  | 14339 | 13229 | 18975 |
|       |       | 14651 | 9612  | 14461 | 13372 | 19031 |
|       |       | 15334 | 10730 | 14607 | 13414 | 19089 |
|       |       | 15574 | 12176 | 14977 | 13494 | 19144 |
|       |       | 15603 | 12772 | 15170 | 13770 | 19151 |
|       |       | 16857 | 13713 | 15206 | 13793 | 19157 |
|       |       | 17014 | 14066 | 15293 | 13990 |       |
|       |       | 17341 | 14335 | 15342 | 14003 |       |
|       |       | 17342 | 14443 | 15487 | 14246 |       |
|       |       | 17479 | 14456 | 15498 | 14444 |       |
|       |       | 17526 | 14506 | 15543 | 15108 |       |
|       |       | 17609 | 15123 | 15633 | 15402 |       |
|       |       | 17754 | 15238 | 15698 | 15564 |       |
|       |       | 17777 | 15458 | 15718 | 15990 |       |
|       |       | 17985 | 15482 | 15800 | 15999 |       |
|       |       | 18244 | 15654 | 15942 | 16024 |       |
|       |       | 18291 | 15754 | 16067 | 16235 |       |
|       |       | 18454 | 15875 | 16236 | 16353 |       |
|       |       | 18995 | 15987 | 16589 | 16364 |       |
|       |       | 19022 | 17104 | 16944 | 16567 |       |
|       |       | 19096 | 17329 | 17030 | 16998 |       |
|       |       | 19166 | 17405 | 17037 | 17334 |       |
|       |       |       | 17514 | 17152 | 17378 |       |
|       |       |       | 17552 | 17297 | 17467 |       |
|       |       |       | 17577 | 17377 | 17639 |       |
|       |       |       | 17755 | 17653 | 17641 |       |
|       |       |       | 18030 | 17748 | 17665 |       |
|       |       |       | 18188 | 17933 | 17763 |       |
|       |       |       | 18395 | 18396 | 17905 |       |
|       |       |       | 18576 | 19080 | 18017 |       |
|       |       |       | 18608 |       | 18139 |       |
|       |       |       | 18629 |       | 18237 |       |
|       |       |       | 18654 |       | 18317 |       |
|       |       |       | 18807 |       | 18398 |       |
|       |       |       | 18830 |       | 18517 |       |
|       |       |       | 18888 |       | 18620 |       |
|       |       |       | 19002 |       | 18662 |       |
|       |       |       | 19063 |       | 18732 |       |

19114

18739

18745

18748

18774

18803

18998

19038

19056

19142

|       |       |       |       |       |       |       |       |       |
|-------|-------|-------|-------|-------|-------|-------|-------|-------|
| 1972  | 516   | 2158  | 1682  | 3303  | 127   | 672   | 692   | 700   |
| 1972  | 516   | 2158  | 1682  | 3303  | 127   | 672   | 692   | 700   |
| 2057  | 572   | 3333  | 4447  | 3638  | 129   | 688   | 788   | 759   |
| 2072  | 1554  | 3730  | 4711  | 4701  | 540   | 1654  | 2125  | 760   |
| 2292  | 2289  | 4115  | 4967  | 4717  | 651   | 1798  | 2232  | 1769  |
| 2390  | 3437  | 4389  | 5208  | 4722  | 737   | 2143  | 2295  | 2151  |
| 2962  | 3795  | 4418  | 6070  | 4815  | 1494  | 2325  | 2419  | 2305  |
| 3161  | 4070  | 4750  | 6518  | 4919  | 1652  | 2746  | 3329  | 2816  |
| 3354  | 4107  | 5168  | 6660  | 5098  | 1660  | 3721  | 3471  | 2859  |
| 3537  | 4436  | 5354  | 6836  | 5713  | 1998  | 3927  | 3568  | 3144  |
| 3633  | 4562  | 5575  | 7049  | 5889  | 2641  | 4023  | 3734  | 3183  |
| 3796  | 4786  | 5771  | 12053 | 5944  | 3617  | 5461  | 4125  | 3426  |
| 3934  | 5078  | 5804  | 12218 | 6005  | 3743  | 5914  | 4962  | 3696  |
| 4127  | 5245  | 5919  | 13842 | 6143  | 4011  | 6301  | 5290  | 3834  |
| 4168  | 5347  | 5923  | 13961 | 6204  | 5733  | 6327  | 5446  | 3895  |
| 4175  | 5732  | 6328  | 14389 | 6237  | 6320  | 6391  | 5471  | 5048  |
| 4201  | 5737  | 6451  | 14564 | 6375  | 7294  | 6645  | 6313  | 5132  |
| 4209  | 5741  | 6802  | 14895 | 6816  | 7462  | 7237  | 6494  | 5189  |
| 4312  | 6028  | 6881  | 15198 | 6862  | 7620  | 7256  | 6604  | 5291  |
| 4467  | 6142  | 6888  | 15323 | 6979  | 7762  | 8186  | 6839  | 5318  |
| 5242  | 6146  | 7026  | 15410 | 6994  | 7803  | 8350  | 7031  | 5346  |
| 5564  | 6207  | 7275  | 15940 | 7375  | 8405  | 8686  | 7070  | 5609  |
| 5992  | 6984  | 7382  | 15950 | 7409  | 8413  | 8859  | 7126  | 5612  |
| 6085  | 7978  | 7680  | 15968 | 7410  | 8548  | 9035  | 7171  | 5637  |
| 6129  | 8051  | 7741  | 16884 | 8034  | 8582  | 9676  | 7224  | 5984  |
| 6228  | 8171  | 7766  | 16941 | 8475  | 8643  | 9759  | 8190  | 6156  |
| 6876  | 8542  | 7904  | 17058 | 9139  | 8669  | 9815  | 8265  | 6199  |
| 6998  | 9273  | 9443  | 17235 | 9409  | 8855  | 10037 | 8306  | 6202  |
| 7090  | 9387  | 9722  | 17246 | 11347 | 9075  | 10077 | 8308  | 6377  |
| 7350  | 9503  | 10355 | 17593 | 11943 | 9326  | 10269 | 8533  | 6398  |
| 7796  | 12397 | 11369 | 17694 | 12202 | 9334  | 10297 | 8684  | 6972  |
| 7937  | 12998 | 11414 | 17747 | 13498 | 9562  | 10337 | 8692  | 7263  |
| 8311  | 13091 | 12185 | 17884 | 13553 | 9691  | 10360 | 8953  | 7588  |
| 8348  | 14081 | 12260 | 17942 | 13585 | 9756  | 10427 | 9095  | 7698  |
| 8376  | 14192 | 12273 | 18418 | 13677 | 9835  | 10604 | 9477  | 7731  |
| 8474  | 14668 | 12303 | 18702 | 13734 | 9873  | 11089 | 9717  | 7825  |
| 8485  | 15289 | 12388 | 18802 | 13868 | 9906  | 11124 | 9843  | 8012  |
| 8637  | 15825 | 13472 |       | 14226 | 9908  | 11174 | 9904  | 8089  |
| 8704  | 15933 | 13763 |       | 14318 | 9930  | 11232 | 9950  | 8140  |
| 8754  | 16123 | 13794 |       | 14346 | 9961  | 11306 | 10092 | 8537  |
| 9263  | 16479 | 13979 |       | 14475 | 9963  | 11338 | 10124 | 8722  |
| 9270  | 16742 | 14316 |       | 14487 | 9973  | 11367 | 10298 | 8743  |
| 9320  | 17005 | 14472 |       | 14518 | 9980  | 11502 | 10351 | 8791  |
| 9399  | 17106 | 14705 |       | 14616 | 10049 | 11534 | 10362 | 8819  |
| 9441  | 17203 | 14719 |       | 14646 | 10105 | 11569 | 10395 | 9182  |
| 9543  | 17248 | 15158 |       | 14677 | 10158 | 11662 | 10517 | 9355  |
| 11396 | 17271 | 15296 |       | 14706 | 10191 | 11683 | 10618 | 9575  |
| 11591 | 17340 | 15421 |       | 15307 | 10280 | 11929 | 10671 | 9864  |
| 12186 | 17544 | 15568 |       | 15328 | 10328 | 12037 | 10972 | 9987  |
| 12205 | 17545 | 15872 |       | 15395 | 10391 | 12088 | 11126 | 9988  |
| 12212 | 17624 | 15906 |       | 15416 | 10397 | 12855 | 11366 | 10370 |
| 12245 | 17656 | 15956 |       | 15459 | 10455 | 13084 | 11394 | 10631 |





18054  
18195  
19143

| 650   | 583   | 2444 | 1414  | 500   | 505  | 603   | 46    | 649   |
|-------|-------|------|-------|-------|------|-------|-------|-------|
| 650   | 583   | 2444 | 1414  | 500   | 505  | 603   | 46    | 649   |
| 738   | 786   | 3077 | 1707  | 1622  | 1305 | 798   | 367   | 1886  |
| 1468  | 1771  | 3273 | 1885  | 1686  | 1584 | 1720  | 426   | 1963  |
| 1739  | 2096  | 3440 | 1923  | 2197  | 2059 | 2094  | 756   | 1974  |
| 2105  | 2882  | 3933 | 4092  | 2326  | 2117 | 2210  | 1530  | 2284  |
| 2217  | 2910  | 4328 | 5085  | 2806  | 2206 | 2214  | 2264  | 2341  |
| 2381  | 3187  | 4511 | 5230  | 2995  | 2239 | 2268  | 2353  | 2350  |
| 2743  | 3618  | 4608 | 5396  | 3717  | 2263 | 2355  | 2535  | 2447  |
| 3503  | 4026  | 5100 | 5813  | 4530  | 2281 | 2633  | 2721  | 2495  |
| 3716  | 4348  | 5104 | 5843  | 4733  | 2309 | 2822  | 2843  | 2505  |
| 3763  | 4354  | 5305 | 6051  | 5392  | 2422 | 3100  | 3056  | 2767  |
| 5570  | 4529  | 5410 | 6096  | 5420  | 2733 | 3331  | 3087  | 2784  |
| 5603  | 4560  | 5417 | 6234  | 5507  | 2800 | 3392  | 3642  | 3115  |
| 5663  | 4599  | 5462 | 6466  | 5742  | 2977 | 4672  | 3689  | 3127  |
| 5971  | 4642  | 5681 | 6757  | 5960  | 3011 | 5228  | 3968  | 3192  |
| 6148  | 4673  | 5827 | 6946  | 6163  | 3032 | 5315  | 4169  | 3216  |
| 6231  | 5252  | 5847 | 7190  | 6258  | 3217 | 5597  | 4589  | 3506  |
| 6235  | 5388  | 5855 | 7574  | 6674  | 3219 | 5973  | 4793  | 3648  |
| 6371  | 5439  | 5902 | 7794  | 6964  | 3274 | 6038  | 4843  | 3868  |
| 6422  | 5551  | 5972 | 7949  | 7036  | 3302 | 6173  | 4878  | 3876  |
| 6526  | 5708  | 6247 | 8068  | 7089  | 3435 | 6348  | 5311  | 4651  |
| 6969  | 5882  | 6318 | 8193  | 7110  | 3828 | 6373  | 5436  | 4657  |
| 6978  | 5920  | 6474 | 8428  | 7152  | 3839 | 6450  | 5524  | 5023  |
| 7390  | 5953  | 6658 | 8450  | 7625  | 4044 | 6940  | 5795  | 5204  |
| 7743  | 6022  | 6744 | 8700  | 7916  | 4313 | 7139  | 6611  | 5801  |
| 7939  | 6264  | 6759 | 8917  | 7948  | 4439 | 7189  | 7187  | 6007  |
| 8083  | 6427  | 6869 | 8926  | 8013  | 4790 | 7268  | 7270  | 6124  |
| 8563  | 6537  | 7030 | 9042  | 8029  | 5376 | 7675  | 7282  | 6409  |
| 8766  | 6575  | 7048 | 9166  | 8067  | 5400 | 7801  | 7886  | 7099  |
| 8799  | 6747  | 7296 | 9218  | 8082  | 5982 | 7962  | 8055  | 7207  |
| 8892  | 6788  | 7343 | 9242  | 8406  | 6572 | 8161  | 8102  | 7394  |
| 8934  | 6981  | 7361 | 9314  | 8437  | 6823 | 8242  | 8598  | 7495  |
| 9090  | 7062  | 7381 | 9440  | 8447  | 6835 | 8456  | 8622  | 7797  |
| 9275  | 7220  | 7470 | 9912  | 8457  | 6910 | 8512  | 8747  | 7851  |
| 11371 | 7252  | 7578 | 10139 | 8487  | 7138 | 8584  | 8820  | 7923  |
| 12051 | 7408  | 7695 | 10398 | 8495  | 7284 | 8728  | 8856  | 7964  |
| 12213 | 7761  | 7713 | 10654 | 8539  | 7442 | 8746  | 9126  | 8192  |
| 13536 | 7802  | 7910 | 12713 | 8605  | 7611 | 8851  | 9403  | 8279  |
| 13616 | 8492  | 7996 | 13281 | 8711  | 7755 | 9014  | 11398 | 8544  |
| 13660 | 8518  | 7999 | 13874 | 8727  | 7857 | 9174  | 11618 | 8587  |
| 13722 | 8757  | 8027 | 14238 | 8823  | 8359 | 9410  | 12877 | 8627  |
| 13956 | 8981  | 8101 | 14583 | 9137  | 8407 | 9447  | 12894 | 8931  |
| 14107 | 9093  | 8156 | 15277 | 9250  | 8426 | 9467  | 12896 | 9494  |
| 14122 | 9161  | 8163 | 15314 | 9318  | 8573 | 9524  | 13035 | 9527  |
| 14130 | 9375  | 8166 | 15484 | 9520  | 8995 | 9539  | 13095 | 9877  |
| 14164 | 9420  | 8169 | 15536 | 9547  | 9036 | 9882  | 13136 | 10214 |
| 14368 | 11939 | 8220 | 15600 | 9613  | 9113 | 9911  | 13143 | 11622 |
| 14437 | 12988 | 8249 | 15888 | 9854  | 9160 | 10020 | 13526 | 11827 |
| 14516 | 13370 | 8364 | 16655 | 10118 | 9238 | 11332 | 13942 | 12039 |
| 14563 | 13587 | 8387 | 16777 | 11168 | 9336 | 11342 | 13965 | 12124 |
| 14599 | 13939 | 8638 | 17541 | 12780 | 9373 | 11620 | 14034 | 12335 |

|       |       |       |       |       |       |       |       |       |
|-------|-------|-------|-------|-------|-------|-------|-------|-------|
| 14933 | 14014 | 8795  | 17847 | 13025 | 9460  | 12275 | 14106 | 12422 |
| 15016 | 14255 | 8824  | 18539 | 13586 | 9468  | 12757 | 14327 | 12922 |
| 15250 | 16048 | 8829  | 18814 | 13678 | 9470  | 12804 | 14426 | 12948 |
| 16066 | 17389 | 8952  | 19071 | 13909 | 9500  | 12848 | 14582 | 12986 |
| 16186 | 17522 | 9141  | 19092 | 14112 | 9528  | 12930 | 15190 | 13027 |
| 16226 | 17865 | 9307  |       | 14418 | 9792  | 13122 | 15412 | 13082 |
| 16242 | 18093 | 9315  |       | 14550 | 10090 | 13200 | 15668 | 13090 |
| 16280 | 18358 | 9345  |       | 14767 | 10220 | 13223 | 15729 | 13147 |
| 16310 | 18607 | 9353  |       | 14858 | 11176 | 13231 | 15883 | 13201 |
| 16700 | 18749 | 9497  |       | 15343 | 11248 | 13284 | 15902 | 13256 |
| 16718 | 18959 | 9999  |       | 15513 | 11360 | 13314 | 15909 | 13271 |
| 16733 | 19009 | 10709 |       | 15570 | 11740 | 13488 | 16217 | 13286 |
| 16898 | 19034 | 11313 |       | 15725 | 11796 | 13648 | 16763 | 13343 |
| 16937 |       | 13538 |       | 15820 | 11823 | 13706 | 17086 | 13465 |
| 17070 |       | 13788 |       | 16398 | 12126 | 13707 | 17226 | 13577 |
| 17319 |       | 14010 |       | 16449 | 12214 | 14247 | 17277 | 13636 |
| 17500 |       | 14020 |       | 16472 | 12280 | 14608 | 17323 | 13701 |
| 17527 |       | 14534 |       | 16858 | 12391 | 14703 | 17403 | 13717 |
| 17810 |       | 14748 |       | 17236 | 12639 | 14863 | 17663 | 13911 |
| 17829 |       | 15517 |       | 17296 | 12788 | 15009 | 17879 | 13980 |
| 18208 |       | 15562 |       | 17304 | 13019 | 15274 | 18050 | 14075 |
| 18253 |       | 15688 |       | 17796 | 13195 | 15359 | 18155 | 14186 |
| 18255 |       | 15974 |       | 18507 | 13227 | 15393 | 18159 | 14234 |
| 18273 |       | 16081 |       | 18563 | 13235 | 15556 | 18270 | 14330 |
| 19133 |       | 16238 |       | 18687 | 13317 | 15622 | 18401 | 14376 |
|       |       | 16473 |       | 18790 | 13318 | 15769 | 18473 | 14503 |
|       |       | 16773 |       | 18838 | 13346 | 15969 | 18626 | 14504 |
|       |       | 17491 |       |       | 13833 | 15970 | 18646 | 14529 |
|       |       | 17563 |       |       | 13963 | 16015 | 18761 | 14814 |
|       |       | 17581 |       |       | 13994 | 16032 | 18778 | 14851 |
|       |       | 17730 |       |       | 14016 | 16036 | 18876 | 15160 |
|       |       | 18267 |       |       | 14082 | 16585 | 18878 | 15187 |
|       |       | 18427 |       |       | 14219 | 16863 | 19125 | 15280 |
|       |       | 18452 |       |       | 14501 | 17028 | 19155 | 15303 |
|       |       | 18491 |       |       | 14672 | 17173 |       | 15305 |
|       |       | 18595 |       |       | 14954 | 17190 |       | 15441 |
|       |       | 18752 |       |       | 15361 | 17208 |       | 15995 |
|       |       | 18913 |       |       | 15592 | 17391 |       | 16468 |
|       |       | 18915 |       |       | 15621 | 17423 |       | 16739 |
|       |       | 19037 |       |       | 15710 | 17434 |       | 16821 |
|       |       | 19061 |       |       | 15846 | 17450 |       | 16822 |
|       |       |       |       |       | 15849 | 17506 |       | 16862 |
|       |       |       |       |       | 15962 | 17616 |       | 16872 |
|       |       |       |       |       | 16012 | 17786 |       | 16896 |
|       |       |       |       |       | 16323 | 17826 |       | 16911 |
|       |       |       |       |       | 16338 | 18383 |       | 16920 |
|       |       |       |       |       | 16359 | 18444 |       | 16969 |
|       |       |       |       |       | 16593 | 18453 |       | 17088 |
|       |       |       |       |       | 16710 | 18532 |       | 17178 |
|       |       |       |       |       | 17074 | 18617 |       | 17221 |
|       |       |       |       |       | 17115 | 18658 |       | 17222 |
|       |       |       |       |       | 17175 | 18665 |       | 17333 |

|       |       |       |
|-------|-------|-------|
| 17223 | 19049 | 17365 |
| 17234 | 19095 | 17414 |
| 17306 |       | 17617 |
| 17311 |       | 17623 |
| 17354 |       | 17759 |
| 17404 |       | 17848 |
| 17406 |       | 17894 |
| 17424 |       | 18007 |
| 17537 |       | 18063 |
| 17664 |       | 18073 |
| 17766 |       | 18323 |
| 18147 |       | 18471 |
| 18389 |       | 18495 |
| 18534 |       | 18523 |
| 18598 |       | 18533 |
| 18747 |       | 18540 |
| 18764 |       | 18592 |
| 18944 |       | 18863 |
| 19011 |       | 18958 |
| 19033 |       | 18962 |
|       |       | 19146 |

|       |       |       |       |       |       |      |       |       |
|-------|-------|-------|-------|-------|-------|------|-------|-------|
| 555   | 3486  | 1459  | 100   | 560   | 409   | 417  | 511   | 727   |
| 555   | 3486  | 1459  | 100   | 560   | 409   | 417  | 511   | 727   |
| 1759  | 4137  | 1488  | 683   | 660   | 457   | 475  | 524   | 1471  |
| 1851  | 4505  | 2363  | 743   | 732   | 480   | 485  | 1884  | 1800  |
| 2152  | 4903  | 3349  | 1845  | 767   | 590   | 617  | 2384  | 1921  |
| 2259  | 5165  | 4203  | 2373  | 1373  | 598   | 618  | 2940  | 2628  |
| 2282  | 5272  | 4267  | 3063  | 1375  | 644   | 635  | 3880  | 2902  |
| 2773  | 5480  | 4644  | 3389  | 1591  | 782   | 707  | 4186  | 3114  |
| 2923  | 5567  | 5294  | 3847  | 3864  | 796   | 783  | 4245  | 4468  |
| 2986  | 5736  | 5337  | 4561  | 4298  | 1553  | 797  | 4708  | 4579  |
| 3128  | 6810  | 5421  | 5374  | 4654  | 1610  | 1378 | 5115  | 5676  |
| 3138  | 7306  | 5542  | 5900  | 5170  | 1735  | 1385 | 5193  | 5940  |
| 3191  | 8626  | 5550  | 6311  | 5639  | 1900  | 1404 | 5256  | 6182  |
| 3614  | 9327  | 5557  | 6379  | 5916  | 2228  | 1705 | 5258  | 6267  |
| 3921  | 11655 | 5704  | 6404  | 6214  | 2230  | 1959 | 5588  | 6401  |
| 4413  | 12265 | 5775  | 6781  | 8057  | 2286  | 2020 | 5762  | 6442  |
| 4501  | 13825 | 5881  | 7080  | 8951  | 2398  | 2080 | 5841  | 6456  |
| 4553  | 13844 | 5903  | 7213  | 9097  | 2686  | 2262 | 5931  | 6529  |
| 4586  | 13864 | 6094  | 7251  | 9223  | 2794  | 2327 | 6064  | 6585  |
| 5114  | 13960 | 6491  | 7512  | 9361  | 3039  | 2365 | 6111  | 6967  |
| 6133  | 14446 | 6595  | 7679  | 9466  | 3479  | 2397 | 6117  | 7439  |
| 6166  | 14469 | 6612  | 7824  | 9496  | 3977  | 2539 | 6208  | 7467  |
| 6799  | 14627 | 6745  | 7841  | 9622  | 4340  | 2760 | 6414  | 7472  |
| 6973  | 14734 | 6848  | 8017  | 9814  | 5320  | 2831 | 6439  | 7579  |
| 7830  | 15324 | 6887  | 8069  | 9866  | 5447  | 3007 | 6772  | 7602  |
| 8003  | 15346 | 6908  | 8557  | 9923  | 5743  | 3676 | 7544  | 7701  |
| 8131  | 15425 | 7147  | 8662  | 9966  | 6151  | 3788 | 7709  | 7878  |
| 8705  | 15472 | 7163  | 8694  | 9983  | 6842  | 3807 | 7751  | 8001  |
| 8768  | 15497 | 7419  | 8716  | 10007 | 7001  | 4739 | 7770  | 8221  |
| 8923  | 15597 | 7656  | 8735  | 10022 | 7958  | 4801 | 7832  | 8362  |
| 9535  | 15712 | 8401  | 8985  | 10048 | 8256  | 5205 | 7866  | 8788  |
| 9588  | 16403 | 8976  | 9063  | 10069 | 8299  | 5756 | 8356  | 9177  |
| 11513 | 16405 | 9078  | 9181  | 10070 | 8732  | 5959 | 8461  | 9246  |
| 12238 | 16485 | 9446  | 9300  | 10123 | 8751  | 6364 | 8963  | 9311  |
| 12612 | 16513 | 10542 | 9434  | 10213 | 8780  | 6952 | 12473 | 12313 |
| 12669 | 16543 | 11327 | 9481  | 10217 | 8796  | 7073 | 13085 | 12748 |
| 12835 | 16741 | 11450 | 9661  | 10304 | 9529  | 7236 | 13278 | 12825 |
| 13044 | 16914 | 12236 | 9692  | 10325 | 9811  | 7280 | 13656 | 13146 |
| 13060 | 16968 | 12309 | 9847  | 10368 | 9895  | 7303 | 14132 | 13869 |
| 13087 | 16975 | 12995 | 9927  | 10381 | 9905  | 7398 | 14721 | 14261 |
| 13154 | 17205 | 13089 | 9951  | 10486 | 9924  | 7552 | 14829 | 16859 |
| 13206 | 17318 | 13755 | 10019 | 10726 | 9928  | 7800 | 16636 | 16995 |
| 13263 | 17478 | 13836 | 10102 | 10851 | 9991  | 8076 | 16823 | 17547 |
| 13323 | 17587 | 13887 | 10122 | 11090 | 10082 | 8184 | 17497 | 17621 |
| 13559 | 17640 | 13903 | 10134 | 11091 | 10194 | 8493 | 18153 | 19121 |
| 13777 | 17686 | 14588 | 10154 | 11179 | 10413 | 8516 | 18285 |       |
| 13828 | 17844 | 14662 | 10215 | 11279 | 10629 | 8521 | 18488 |       |
| 13901 | 18399 | 14689 | 10218 | 11472 | 10701 | 8565 | 18825 |       |
| 13945 | 18519 | 15499 | 10221 | 11486 | 11180 | 8706 | 18868 |       |
| 14052 | 18849 | 15737 | 10242 | 11732 | 11182 | 8814 | 19094 |       |
| 14069 | 18955 | 15939 | 10276 | 11736 | 11238 | 8839 |       |       |
| 15077 | 19116 | 16073 | 10293 | 11829 | 11277 | 9081 |       |       |

|       |       |       |       |       |       |
|-------|-------|-------|-------|-------|-------|
| 15164 | 16085 | 10301 | 12044 | 11310 | 9589  |
| 15569 | 16219 | 10305 | 12069 | 11448 | 9926  |
| 15624 | 16306 | 10306 | 12123 | 11476 | 10313 |
| 15905 | 16367 | 10307 | 12180 | 11479 | 10806 |
| 15961 | 16372 | 10336 | 12529 | 11615 | 11254 |
| 15965 | 16749 | 10394 | 12630 | 11624 | 11593 |
| 16044 | 16889 | 10431 | 12670 | 11639 | 12125 |
| 16231 | 16942 | 10468 | 12678 | 11690 | 12764 |
| 16962 | 16946 | 10717 | 12765 | 11768 | 12807 |
| 17036 | 16974 | 10747 | 12898 | 11781 | 12810 |
| 17047 | 16987 | 10871 | 12996 | 11907 | 12829 |
| 17103 | 16988 | 10891 | 13311 | 12109 | 12941 |
| 17191 | 17016 | 10973 | 14250 | 12152 | 13078 |
| 17198 | 17034 | 11067 | 14908 | 12499 | 13292 |
| 17435 | 17075 | 11245 | 15828 | 12571 | 13362 |
| 17437 | 17162 | 11272 | 16322 | 12602 | 13439 |
| 17443 | 17182 | 11365 | 16474 | 12618 | 13709 |
| 17584 | 17230 | 11429 | 16756 | 12697 | 13934 |
| 17601 | 17265 | 11443 | 16840 | 12753 | 14183 |
| 17667 | 17603 | 11518 | 16972 | 12842 | 14925 |
| 17688 | 17634 | 11544 | 17325 | 12900 | 14931 |
| 17967 | 17657 | 11550 | 17353 | 12904 | 15275 |
| 18245 | 17693 | 11564 | 18284 | 12939 | 15643 |
| 18314 | 17773 | 11590 | 18330 | 12955 | 16584 |
| 18366 | 17831 | 11630 | 18664 | 12997 | 16672 |
| 18393 | 18434 | 11632 |       | 13018 | 16703 |
| 18420 | 18482 | 11685 |       | 13484 | 16824 |
| 18725 | 18535 | 11743 |       | 13760 | 16825 |
| 18846 | 18559 | 11746 |       | 13779 | 17335 |
| 18947 | 18701 | 11773 |       | 14098 | 17390 |
| 19179 | 18709 | 11799 |       | 14193 | 17613 |
|       | 18966 | 11901 |       | 14251 | 18067 |
|       |       | 11965 |       | 14279 | 18327 |
|       |       | 12325 |       | 14678 | 18333 |
|       |       | 12476 |       | 14909 | 18663 |
|       |       | 12543 |       | 14963 | 18855 |
|       |       | 12563 |       | 15330 |       |
|       |       | 12640 |       | 15959 |       |
|       |       | 12918 |       | 16417 |       |
|       |       | 12937 |       | 17084 |       |
|       |       | 12950 |       | 17399 |       |
|       |       | 13051 |       | 17535 |       |
|       |       | 13178 |       | 17574 |       |
|       |       | 13193 |       | 17807 |       |
|       |       | 13197 |       | 18023 |       |
|       |       | 13255 |       | 18101 |       |
|       |       | 13303 |       | 18148 |       |
|       |       | 13304 |       | 18520 |       |
|       |       | 13310 |       | 19180 |       |
|       |       | 13704 |       |       |       |
|       |       | 14162 |       |       |       |
|       |       | 14195 |       |       |       |

14502  
15593  
15856  
16091  
16097  
16157  
16380  
16505  
16511  
16578  
16880  
17126  
17189  
17376  
17382  
17411  
17756  
17917  
17965  
18201  
18722



|       |       |       |      |      |       |       |       |       |
|-------|-------|-------|------|------|-------|-------|-------|-------|
| 2055  | 1703  | 536   | 172  | 545  | 578   | 636   | 156   | 4347  |
| 2055  | 1703  | 536   | 172  | 545  | 578   | 636   | 156   | 4347  |
| 2199  | 1816  | 611   | 261  | 689  | 591   | 805   | 709   | 4503  |
| 2685  | 1880  | 806   | 579  | 710  | 791   | 1742  | 1966  | 4758  |
| 2745  | 2070  | 1502  | 612  | 751  | 795   | 1952  | 2067  | 5011  |
| 3023  | 2165  | 1833  | 655  | 753  | 1366  | 2121  | 3159  | 5248  |
| 3599  | 2231  | 2106  | 747  | 1363 | 1431  | 2304  | 3361  | 5561  |
| 3606  | 2606  | 2126  | 1853 | 1520 | 1635  | 2336  | 3382  | 5596  |
| 4055  | 2661  | 2248  | 1979 | 1559 | 1642  | 2382  | 4108  | 5790  |
| 4533  | 2759  | 2334  | 2074 | 1818 | 1656  | 2383  | 4188  | 5850  |
| 5261  | 2900  | 2392  | 2207 | 1989 | 1711  | 2599  | 4194  | 6084  |
| 5391  | 2985  | 2555  | 2301 | 2034 | 2038  | 2791  | 4427  | 6794  |
| 5438  | 3004  | 2895  | 2323 | 2193 | 2077  | 3466  | 4429  | 6919  |
| 6061  | 3076  | 2914  | 2479 | 2213 | 2081  | 3770  | 4603  | 7018  |
| 6144  | 3757  | 3158  | 2896 | 2253 | 2136  | 4368  | 4944  | 7973  |
| 7176  | 4352  | 3213  | 2945 | 2320 | 2219  | 4488  | 6304  | 8011  |
| 7582  | 4619  | 3754  | 3024 | 2414 | 2223  | 4629  | 6361  | 8269  |
| 7673  | 4696  | 3778  | 3080 | 2546 | 3074  | 4960  | 6610  | 8386  |
| 7740  | 4744  | 4332  | 3188 | 2897 | 3299  | 5234  | 7372  | 8517  |
| 7772  | 4795  | 4519  | 3233 | 3390 | 3312  | 6186  | 7497  | 8690  |
| 7787  | 5133  | 4543  | 3460 | 3829 | 3463  | 6308  | 7521  | 9507  |
| 7896  | 5492  | 5144  | 3596 | 3896 | 3671  | 6663  | 7882  | 9880  |
| 7912  | 5552  | 5904  | 3715 | 4895 | 3888  | 7112  | 7997  | 11399 |
| 8007  | 5592  | 6175  | 3731 | 5089 | 3970  | 7527  | 8572  | 11451 |
| 8180  | 5764  | 6415  | 3818 | 5326 | 4343  | 7631  | 9509  | 13265 |
| 8237  | 5823  | 6871  | 4027 | 5486 | 4836  | 7858  | 10353 | 13731 |
| 8282  | 6053  | 6891  | 4431 | 6130 | 5044  | 8075  | 13020 | 14060 |
| 8522  | 6103  | 7154  | 4613 | 6356 | 6828  | 8615  | 13034 | 14128 |
| 8771  | 6206  | 7195  | 4660 | 6359 | 7083  | 8776  | 13101 | 14188 |
| 8912  | 6726  | 7219  | 4933 | 6857 | 7148  | 8920  | 13165 | 14505 |
| 9019  | 6827  | 7687  | 4964 | 6864 | 7169  | 9043  | 13185 | 14587 |
| 9422  | 6834  | 7786  | 5250 | 6882 | 7643  | 9237  | 13438 | 15196 |
| 9553  | 6893  | 7872  | 5435 | 6995 | 8545  | 9554  | 13522 | 15641 |
| 9595  | 7079  | 8285  | 5495 | 7842 | 8551  | 9820  | 13583 | 15751 |
| 11219 | 7696  | 8414  | 5734 | 7888 | 8564  | 9844  | 13584 | 15907 |
| 13517 | 7760  | 8674  | 5901 | 7968 | 8649  | 11372 | 13872 | 16185 |
| 13657 | 7765  | 8691  | 6066 | 8061 | 8899  | 11831 | 14467 | 16421 |
| 13905 | 7854  | 8702  | 6265 | 8224 | 9059  | 12155 | 14733 | 16458 |
| 14018 | 8070  | 8900  | 6399 | 8244 | 9810  | 12727 | 14843 | 16817 |
| 14613 | 8547  | 8966  | 6758 | 8309 | 10278 | 12756 | 15270 | 16830 |
| 14811 | 8850  | 9018  | 6879 | 8409 | 10664 | 12858 | 15554 | 16971 |
| 14984 | 9074  | 9197  | 6937 | 8449 | 10964 | 12879 | 15623 | 17000 |
| 15256 | 9088  | 9230  | 7117 | 8574 | 11499 | 12892 | 15811 | 17259 |
| 15542 | 9241  | 9245  | 7558 | 8620 | 11566 | 13007 | 15988 | 17776 |
| 15659 | 9259  | 9428  | 7846 | 8670 | 11589 | 13029 | 16041 | 17817 |
| 16090 | 9352  | 9523  | 8091 | 9061 | 12104 | 13057 | 16056 | 17877 |
| 16476 | 9550  | 9648  | 8114 | 9105 | 12402 | 13171 | 16831 | 17928 |
| 16668 | 12619 | 12153 | 8503 | 9132 | 12584 | 13262 | 16888 | 18376 |
| 17364 | 13106 | 12611 | 8528 | 9257 | 12673 | 13546 | 17049 | 18416 |
| 17830 | 13269 | 13198 | 8550 | 9293 | 12786 | 13615 | 17076 | 18463 |
| 18122 | 13530 | 13601 | 8609 | 9512 | 12886 | 13691 | 17279 | 19171 |
| 18258 | 14150 | 13689 | 8748 | 9677 | 12935 | 13809 | 17367 |       |

|       |       |       |       |       |       |       |       |
|-------|-------|-------|-------|-------|-------|-------|-------|
| 18413 | 14237 | 13702 | 9003  | 9753  | 12946 | 14156 | 17477 |
| 18590 | 14643 | 13757 | 9044  | 10572 | 12969 | 14701 | 17567 |
| 18715 | 14764 | 13759 | 9168  | 10693 | 13042 | 15223 | 17778 |
| 18926 | 14789 | 13936 | 9255  | 11568 | 13046 | 15424 | 17834 |
| 18933 | 15960 | 14555 | 9284  | 11798 | 13819 | 15447 | 18429 |
|       | 16394 | 14787 | 9397  | 11933 | 13854 | 15640 | 18521 |
|       | 16413 | 15535 | 9404  | 11995 | 13949 | 15929 | 18527 |
|       | 16424 | 15573 | 9565  | 12043 | 14468 | 16017 | 18548 |
|       | 16760 | 15742 | 9789  | 12272 | 14881 | 16680 | 18869 |
|       | 17133 | 15752 | 10745 | 12490 | 14927 | 16881 | 18985 |
|       | 17244 | 15772 | 11508 | 12631 | 14962 | 16887 |       |
|       | 17469 | 15823 | 11970 | 12942 | 14978 | 17019 |       |
|       | 17515 | 15992 | 12052 | 12974 | 15021 | 17078 |       |
|       | 17889 | 16004 | 12613 | 13023 | 15137 | 17101 |       |
|       | 18645 | 16135 | 12729 | 13056 | 15614 | 17192 |       |
|       |       | 16775 | 12731 | 13079 | 15814 | 17957 |       |
|       |       | 16844 | 12884 | 13202 | 15934 | 18022 |       |
|       |       | 16922 | 12888 | 13230 | 16144 | 18247 |       |
|       |       | 16973 | 12952 | 13338 | 16263 | 18503 |       |
|       |       | 17161 | 12962 | 13527 | 16484 | 18512 |       |
|       |       | 17194 | 13050 | 14593 | 16506 | 18567 |       |
|       |       | 17338 | 13109 | 14720 | 16689 | 18622 |       |
|       |       | 17363 | 13163 | 15017 | 16704 | 18656 |       |
|       |       | 17483 | 13191 | 15192 | 16879 | 18710 |       |
|       |       | 17510 | 13238 | 15374 | 16890 | 18718 |       |
|       |       | 17551 | 13257 | 15731 | 16906 | 18785 |       |
|       |       | 17578 | 13264 | 15761 | 16964 | 18941 |       |
|       |       | 17888 | 13371 | 15788 | 17052 |       |       |
|       |       | 17916 | 13437 | 15795 | 17177 |       |       |
|       |       | 18746 | 13612 | 15955 | 17291 |       |       |
|       |       | 18780 | 13683 | 15986 | 17294 |       |       |
|       |       |       | 13790 | 16047 | 17359 |       |       |
|       |       |       | 14271 | 16486 | 17381 |       |       |
|       |       |       | 14584 | 17098 | 17400 |       |       |
|       |       |       | 14882 | 17136 | 17430 |       |       |
|       |       |       | 15082 | 17193 | 17531 |       |       |
|       |       |       | 15258 | 17250 | 17558 |       |       |
|       |       |       | 15650 | 17321 | 17643 |       |       |
|       |       |       | 15912 | 17421 | 17872 |       |       |
|       |       |       | 16153 | 17422 | 18115 |       |       |
|       |       |       | 16176 | 17431 | 18331 |       |       |
|       |       |       | 16427 | 17456 | 18909 |       |       |
|       |       |       | 16561 | 17484 |       |       |       |
|       |       |       | 16917 | 17824 |       |       |       |
|       |       |       | 16934 | 18192 |       |       |       |
|       |       |       | 17116 | 18300 |       |       |       |
|       |       |       | 17372 | 18445 |       |       |       |
|       |       |       | 17573 | 18450 |       |       |       |
|       |       |       | 17627 | 18586 |       |       |       |
|       |       |       | 17742 | 18649 |       |       |       |
|       |       |       | 17838 | 18681 |       |       |       |
|       |       |       | 18135 | 18828 |       |       |       |

|       |       |
|-------|-------|
| 18197 | 18848 |
| 18279 | 18867 |
| 18447 | 18932 |
| 18455 | 19118 |
| 18812 |       |
| 18818 |       |
| 18938 |       |
| 18991 |       |
| 19005 |       |

|       |       |      |      |      |       |       |       |      |
|-------|-------|------|------|------|-------|-------|-------|------|
| 3450  | 515   | 221  | 447  | 528  | 787   | 586   | 1600  | 468  |
| 3450  | 515   | 221  | 447  | 528  | 787   | 586   | 1600  | 468  |
| 4704  | 735   | 249  | 449  | 563  | 799   | 2115  | 1748  | 625  |
| 4781  | 1638  | 282  | 473  | 628  | 1901  | 2427  | 2095  | 654  |
| 4813  | 1764  | 344  | 517  | 675  | 2175  | 2464  | 2144  | 706  |
| 5130  | 2007  | 423  | 548  | 686  | 2209  | 2691  | 2349  | 712  |
| 5220  | 2618  | 448  | 571  | 794  | 2271  | 2868  | 2631  | 1252 |
| 6029  | 2699  | 459  | 630  | 1374 | 2424  | 3017  | 2972  | 1920 |
| 6098  | 2783  | 569  | 634  | 1398 | 3008  | 3099  | 2981  | 1987 |
| 6169  | 2942  | 657  | 725  | 1463 | 3060  | 3193  | 3215  | 2313 |
| 6814  | 3688  | 661  | 773  | 1587 | 3167  | 3408  | 3235  | 2569 |
| 7084  | 4316  | 693  | 780  | 1784 | 3368  | 3702  | 3236  | 2597 |
| 7132  | 4508  | 719  | 1072 | 1905 | 3452  | 4374  | 3280  | 2725 |
| 7322  | 4768  | 1001 | 1259 | 2006 | 3666  | 4406  | 3509  | 2878 |
| 7678  | 5626  | 1083 | 1318 | 2041 | 3697  | 4578  | 3892  | 2968 |
| 7970  | 5695  | 1161 | 1367 | 2142 | 3893  | 4612  | 4361  | 3089 |
| 8215  | 6184  | 1224 | 1409 | 2291 | 4228  | 4794  | 5221  | 3131 |
| 8271  | 6325  | 1227 | 1508 | 2338 | 4372  | 4810  | 5581  | 3143 |
| 9401  | 6351  | 1285 | 1525 | 2395 | 4449  | 4871  | 5701  | 3184 |
| 9426  | 6435  | 1434 | 1536 | 2433 | 4546  | 5566  | 5782  | 3248 |
| 11423 | 7180  | 1451 | 1552 | 2443 | 4791  | 5627  | 6043  | 3291 |
| 12018 | 7229  | 1466 | 1568 | 2451 | 4931  | 5908  | 6433  | 3432 |
| 12945 | 7418  | 1500 | 1586 | 2604 | 5284  | 6632  | 6787  | 3611 |
| 12964 | 7455  | 1521 | 1588 | 2640 | 6185  | 7212  | 6917  | 3935 |
| 13031 | 7561  | 1531 | 1592 | 2662 | 7108  | 7326  | 7002  | 3948 |
| 13049 | 7647  | 1549 | 1597 | 2693 | 7283  | 7587  | 7194  | 4317 |
| 13088 | 7998  | 1557 | 1598 | 2718 | 7391  | 7610  | 7498  | 4401 |
| 13240 | 8258  | 1570 | 1907 | 2772 | 7424  | 7734  | 7856  | 4513 |
| 13319 | 8658  | 1593 | 1986 | 2819 | 7816  | 8276  | 8248  | 4697 |
| 13838 | 8698  | 2506 | 2008 | 2852 | 8307  | 8739  | 8267  | 5216 |
| 13847 | 8738  | 2682 | 2050 | 2951 | 8911  | 8825  | 8345  | 5270 |
| 14464 | 9034  | 2710 | 2107 | 3002 | 9584  | 8914  | 8392  | 5321 |
| 14497 | 9083  | 3514 | 2201 | 3061 | 11345 | 8974  | 8661  | 5455 |
| 14693 | 9084  | 4242 | 2293 | 3147 | 11355 | 9179  | 8969  | 5987 |
| 15594 | 9386  | 4371 | 2413 | 3163 | 12382 | 9852  | 9104  | 6392 |
| 15627 | 9388  | 4598 | 2598 | 3805 | 13519 | 10026 | 10025 | 6430 |
| 16254 | 9495  | 4805 | 2741 | 3866 | 13668 | 10827 | 10028 | 6924 |
| 16454 | 9726  | 6353 | 2848 | 3963 | 14837 | 13462 | 10056 | 7216 |
| 16826 | 9903  | 7097 | 2857 | 4067 | 15812 | 13876 | 10083 | 7487 |
| 16875 | 9960  | 7140 | 3029 | 4336 | 16046 | 13962 | 11469 | 7615 |
| 17151 | 9979  | 7609 | 3132 | 4443 | 16645 | 14087 | 11922 | 7637 |
| 17672 | 9985  | 7624 | 3152 | 4713 | 17542 | 14120 | 11991 | 8168 |
| 17702 | 10076 | 7874 | 3229 | 4987 | 18008 | 14190 | 12028 | 8189 |
| 17736 | 10126 | 7972 | 3513 | 6269 | 18432 | 14383 | 12115 | 8199 |
| 17876 | 10130 | 8035 | 3575 | 6271 | 19045 | 14525 | 12169 | 8213 |
| 17948 | 10164 | 8724 | 3819 | 6455 |       | 14533 | 12208 | 8377 |
|       | 10190 | 9098 | 3869 | 7014 |       | 14638 | 12628 | 8523 |
|       | 10219 | 9474 | 3905 | 7686 |       | 15078 | 12926 | 8553 |
|       | 10247 | 9538 | 4161 | 7722 |       | 15652 | 14103 | 8852 |
|       | 10275 | 9545 | 4666 | 7735 |       | 15664 | 14322 | 8907 |
|       | 10277 | 9549 | 4796 | 7742 |       | 15851 | 14892 | 9069 |
|       | 10387 | 9754 | 5833 | 8077 |       | 16502 | 15391 | 9089 |

|       |       |       |       |       |       |       |
|-------|-------|-------|-------|-------|-------|-------|
| 10424 | 9761  | 5929  | 8085  | 16836 | 15547 | 9091  |
| 10834 | 9813  | 6250  | 8288  | 16945 | 15930 | 9210  |
| 11065 | 9898  | 6382  | 8541  | 17054 | 16052 | 9609  |
| 11210 | 9907  | 6424  | 8606  | 17113 | 16396 | 9967  |
| 11402 | 9992  | 7264  | 8760  | 17300 | 16621 | 11976 |
| 11421 | 10011 | 8049  | 8960  | 17676 | 16748 | 12357 |
| 11619 | 10015 | 8339  | 9110  | 17685 | 17293 | 12662 |
| 11631 | 10106 | 8736  | 9260  | 18082 | 17724 | 12746 |
| 11700 | 10107 | 8741  | 9679  | 18107 | 17753 | 12793 |
| 11750 | 10184 | 8847  | 10210 | 18424 | 17821 | 12899 |
| 11753 | 10270 | 8972  | 11133 | 18684 | 18062 | 13174 |
| 11769 | 10813 | 8984  | 11288 | 18905 | 18134 | 13291 |
| 11791 | 10922 | 9372  | 11549 |       | 18268 | 13400 |
| 11802 | 11060 | 9411  | 11574 |       |       | 13622 |
| 11803 | 11131 | 9454  | 11903 |       |       | 13712 |
| 11830 | 11284 | 9972  | 12013 |       |       | 14026 |
| 11898 | 11387 | 10027 | 12314 |       |       | 14056 |
| 11944 | 11617 | 10065 | 12379 |       |       | 14127 |
| 11977 | 11626 | 10241 | 13133 |       |       | 14153 |
| 12064 | 11634 | 10354 | 13225 |       |       | 14340 |
| 12472 | 11981 | 10892 | 13630 |       |       | 15046 |
| 12481 | 11985 | 10956 | 13633 |       |       | 15140 |
| 12501 | 12067 | 11153 | 13676 |       |       | 15796 |
| 12553 | 13145 | 11178 | 14424 |       |       | 15827 |
| 12582 | 13312 | 11184 | 14988 |       |       | 15871 |
| 12636 | 13313 | 11274 | 15020 |       |       | 15903 |
| 12700 | 13339 | 11304 | 15859 |       |       | 16065 |
| 12874 | 13374 | 11409 | 16019 |       |       | 16177 |
| 12882 | 13429 | 11523 | 16542 |       |       | 16276 |
| 12938 | 13544 | 11573 | 16637 |       |       | 16882 |
| 13126 | 13907 | 11844 | 16788 |       |       | 16915 |
| 13369 | 14240 | 12030 | 17201 |       |       | 16919 |
| 13602 | 14560 | 12301 | 17255 |       |       | 18089 |
| 14708 | 14950 | 12824 | 17375 |       |       | 18575 |
| 14804 | 14953 | 12977 | 17508 |       |       | 18822 |
| 14805 | 15057 | 13103 | 17696 |       |       | 19030 |
| 14874 | 15891 | 13114 | 17880 |       |       |       |
| 14991 | 15983 | 13210 | 18003 |       |       |       |
| 15022 | 16358 | 13217 | 18035 |       |       |       |
| 15023 | 16618 | 13245 | 18110 |       |       |       |
| 15689 | 16670 | 13366 | 18677 |       |       |       |
| 16022 | 16674 | 13548 | 18827 |       |       |       |
| 16092 | 17283 | 13573 |       |       |       |       |
| 16094 | 17446 | 13600 |       |       |       |       |
| 16304 | 17788 | 13638 |       |       |       |       |
| 16335 | 18090 | 13764 |       |       |       |       |
| 16389 | 18136 | 13771 |       |       |       |       |
| 16570 | 18239 | 14104 |       |       |       |       |
| 16610 | 18261 | 14134 |       |       |       |       |
| 17219 | 18515 | 14465 |       |       |       |       |
| 17237 | 18760 | 14524 |       |       |       |       |
| 17253 | 18826 | 14713 |       |       |       |       |

|       |       |       |
|-------|-------|-------|
| 17254 | 18893 | 14786 |
| 17284 | 18910 | 14873 |
| 17317 | 18914 | 14957 |
| 17398 | 19020 | 14982 |
| 17470 | 19111 | 14987 |
| 17801 |       | 15793 |
| 17899 |       | 16014 |
| 17929 |       | 16582 |
| 18027 |       | 16845 |
| 18028 |       | 16939 |
| 18040 |       | 17428 |
| 18119 |       | 17897 |
| 18121 |       | 17970 |
| 18128 |       | 18260 |
| 18176 |       | 18350 |
| 18242 |       | 18714 |
| 18301 |       | 18861 |
| 18339 |       | 18951 |
| 18635 |       | 19053 |
| 18650 |       |       |
| 18651 |       |       |
| 18683 |       |       |
| 18884 |       |       |
| 18917 |       |       |
| 19149 |       |       |

|       |       |       |       |       |       |       |       |      |
|-------|-------|-------|-------|-------|-------|-------|-------|------|
| 1560  | 595   | 479   | 176   | 338   | 647   | 1547  | 621   | 434  |
| 1560  | 595   | 479   | 176   | 338   | 647   | 1547  | 621   | 434  |
| 1706  | 739   | 736   | 285   | 1107  | 803   | 1941  | 1746  | 494  |
| 1767  | 793   | 1247  | 1336  | 1546  | 2101  | 1975  | 2523  | 564  |
| 2342  | 1392  | 1411  | 1372  | 1841  | 2202  | 2243  | 2667  | 580  |
| 2620  | 1561  | 1541  | 1528  | 2016  | 2934  | 3649  | 2678  | 609  |
| 2636  | 2003  | 1573  | 1792  | 2083  | 3172  | 3695  | 3040  | 754  |
| 2967  | 2013  | 1623  | 1806  | 2086  | 3305  | 4038  | 3342  | 1050 |
| 3474  | 2261  | 1626  | 1904  | 2235  | 3311  | 4731  | 4484  | 1108 |
| 3626  | 3081  | 1639  | 1915  | 2870  | 3632  | 4808  | 4531  | 1231 |
| 4149  | 3656  | 1694  | 2071  | 3228  | 3718  | 4817  | 4605  | 1246 |
| 4165  | 3672  | 1795  | 2078  | 3246  | 3724  | 5198  | 4727  | 1289 |
| 4285  | 3768  | 1856  | 2367  | 3465  | 3980  | 5335  | 6273  | 1306 |
| 4397  | 3857  | 1867  | 2431  | 3620  | 5528  | 5460  | 6897  | 1347 |
| 4472  | 3889  | 1944  | 2903  | 3621  | 6073  | 5793  | 7038  | 1410 |
| 4542  | 4301  | 1970  | 2956  | 3644  | 6281  | 5816  | 7069  | 1424 |
| 4573  | 4464  | 2147  | 3057  | 3678  | 6700  | 6345  | 7300  | 1426 |
| 4594  | 4607  | 2277  | 3574  | 3684  | 7129  | 6621  | 7984  | 1450 |
| 4718  | 4996  | 2297  | 3720  | 3712  | 7297  | 7218  | 8262  | 1518 |
| 4723  | 5064  | 2359  | 3777  | 4085  | 7371  | 7433  | 8295  | 1701 |
| 4844  | 5259  | 2865  | 3965  | 4117  | 7430  | 7821  | 8317  | 3296 |
| 4936  | 5343  | 2987  | 3975  | 4344  | 7569  | 7909  | 8361  | 3958 |
| 6443  | 5375  | 3027  | 3985  | 4383  | 7887  | 8024  | 8794  | 3976 |
| 6499  | 5861  | 3538  | 4008  | 4493  | 7914  | 8421  | 10326 | 4307 |
| 6782  | 6024  | 3571  | 4263  | 4835  | 8566  | 8491  | 12959 | 4388 |
| 6826  | 7247  | 3798  | 4341  | 5041  | 8689  | 8647  | 13118 | 4471 |
| 7078  | 8207  | 3953  | 4674  | 5342  | 8936  | 9199  | 13234 | 4569 |
| 7235  | 8257  | 4580  | 5632  | 5611  | 8999  | 9341  | 13555 | 4784 |
| 7406  | 8375  | 4820  | 5661  | 5807  | 10634 | 9408  | 13605 | 5309 |
| 7422  | 8378  | 5532  | 6162  | 5852  | 11932 | 9435  | 13614 | 5563 |
| 7431  | 8549  | 5691  | 6333  | 6008  | 12257 | 11249 | 13647 | 5595 |
| 7880  | 8992  | 5748  | 7143  | 7017  | 13030 | 11293 | 13964 | 5673 |
| 8119  | 9068  | 5779  | 7340  | 7067  | 13121 | 12854 | 14500 | 6607 |
| 8123  | 9232  | 6411  | 7703  | 7258  | 13151 | 12883 | 14523 | 6849 |
| 8273  | 11206 | 6454  | 8685  | 7450  | 13259 | 12912 | 14585 | 6928 |
| 8310  | 11220 | 7005  | 9252  | 7685  | 13490 | 12961 | 14591 | 6936 |
| 8612  | 11545 | 7172  | 9563  | 7828  | 13720 | 12991 | 14612 | 6960 |
| 9028  | 11582 | 7250  | 11919 | 8434  | 13746 | 13026 | 15048 | 7215 |
| 9079  | 11596 | 7363  | 12022 | 8602  | 13766 | 13032 | 15136 | 7426 |
| 9134  | 11993 | 7820  | 12266 | 8680  | 13805 | 13120 | 15508 | 7681 |
| 9144  | 12131 | 8020  | 12343 | 8954  | 13850 | 13613 | 15616 | 7865 |
| 9248  | 12151 | 8045  | 12526 | 9379  | 13895 | 13632 | 15702 | 7883 |
| 9339  | 12354 | 8478  | 12834 | 9881  | 13993 | 14781 | 15845 | 8023 |
| 9457  | 12419 | 8540  | 12853 | 11247 | 14455 | 15026 | 16425 | 8039 |
| 9493  | 12461 | 8988  | 13097 | 11679 | 14553 | 15049 | 16873 | 8052 |
| 9592  | 12488 | 9065  | 13607 | 12906 | 14666 | 15480 | 16980 | 8590 |
| 9614  | 12531 | 9598  | 13749 | 12951 | 14796 | 16045 | 17139 | 8629 |
| 10010 | 12699 | 9869  | 13775 | 12971 | 15068 | 16963 | 17165 | 8779 |
| 11162 | 12704 | 10187 | 14030 | 13073 | 15220 | 17080 | 17199 | 8853 |
| 11904 | 12823 | 11145 | 14227 | 13110 | 15271 | 17140 | 17286 | 8866 |
| 11962 | 12875 | 11151 | 14495 | 13172 | 15335 | 17166 | 17692 | 8946 |
| 12216 | 12928 | 11205 | 14813 | 13347 | 15367 | 17170 | 17739 | 9120 |





15765  
15819  
15926  
16062  
16063  
16126  
16188  
16189  
16382  
16444  
16518  
16551  
16555  
16569  
16571  
16602  
16635  
16641  
16691  
16758  
16785  
17408  
17606  
17749  
17774  
17851  
17873  
17896  
17900  
17973  
18004  
18039  
18048  
18069  
18075  
18076  
18092  
18108  
18117  
18129  
18141  
18172  
18205  
18220  
18223  
18231  
18235  
18256  
18304  
18337  
18346  
18377

18440  
18443  
18729  
18763  
18788  
18858  
18885  
18886  
18892  
18902  
18908  
18989  
19046

|       |      |      |       |       |      |      |       |       |
|-------|------|------|-------|-------|------|------|-------|-------|
| 25    | 390  | 638  | 351   | 1515  | 626  | 419  | 362   | 1310  |
| 25    | 390  | 638  | 351   | 1515  | 626  | 419  | 362   | 1310  |
| 256   | 428  | 646  | 1461  | 1674  | 1371 | 461  | 645   | 1365  |
| 315   | 492  | 696  | 1544  | 1790  | 1430 | 666  | 1719  | 1961  |
| 347   | 582  | 800  | 1608  | 1958  | 1435 | 723  | 2037  | 2171  |
| 368   | 698  | 1339 | 1875  | 1968  | 1470 | 770  | 2091  | 2356  |
| 489   | 740  | 1401 | 1926  | 2504  | 1578 | 1400 | 2255  | 3048  |
| 493   | 748  | 1474 | 2226  | 2517  | 1583 | 1599 | 2399  | 3307  |
| 543   | 1034 | 1510 | 2351  | 2842  | 1935 | 1653 | 2448  | 3320  |
| 550   | 1304 | 1895 | 2512  | 2875  | 1956 | 1789 | 3162  | 3397  |
| 551   | 1348 | 2503 | 2607  | 2994  | 2119 | 1846 | 3332  | 3483  |
| 1143  | 1370 | 2550 | 2694  | 2997  | 2177 | 1965 | 3422  | 3540  |
| 1188  | 1381 | 2603 | 2799  | 3105  | 2312 | 2018 | 3436  | 3581  |
| 1206  | 1389 | 2695 | 2835  | 3206  | 2556 | 2112 | 3586  | 3590  |
| 1281  | 1396 | 2850 | 2883  | 3531  | 2809 | 2135 | 4075  | 3640  |
| 1314  | 1467 | 2879 | 3264  | 3566  | 2826 | 2208 | 4156  | 3736  |
| 1329  | 1469 | 2885 | 3542  | 3601  | 3044 | 2276 | 4284  | 4229  |
| 1335  | 1483 | 2888 | 4845  | 3726  | 3221 | 2310 | 4550  | 4952  |
| 1362  | 1484 | 3026 | 4875  | 3810  | 3271 | 2333 | 4747  | 5470  |
| 1384  | 1501 | 3053 | 4900  | 3886  | 3324 | 2337 | 6251  | 5621  |
| 1391  | 1567 | 3088 | 5281  | 4028  | 3434 | 2394 | 6449  | 6503  |
| 1514  | 1967 | 3117 | 5634  | 4185  | 3456 | 2518 | 6805  | 6591  |
| 1529  | 2043 | 3365 | 6014  | 4381  | 3520 | 2727 | 7072  | 7116  |
| 1574  | 2063 | 3402 | 6366  | 4448  | 3711 | 2862 | 7134  | 7388  |
| 1763  | 2079 | 3550 | 7027  | 4509  | 3719 | 2988 | 7436  | 7403  |
| 2375  | 2082 | 3786 | 7044  | 4544  | 3833 | 3069 | 8019  | 7719  |
| 2713  | 2169 | 3827 | 7202  | 4675  | 3870 | 3116 | 8048  | 7868  |
| 3166  | 2344 | 3922 | 7705  | 4787  | 4235 | 3122 | 8270  | 7879  |
| 3338  | 2391 | 3936 | 7746  | 4840  | 4260 | 3334 | 8467  | 7969  |
| 3815  | 2663 | 4187 | 8063  | 5141  | 4620 | 3366 | 8500  | 8128  |
| 4051  | 2768 | 4281 | 8607  | 5479  | 4868 | 3381 | 8524  | 8160  |
| 4428  | 2770 | 4483 | 8846  | 5489  | 5314 | 3388 | 8613  | 8408  |
| 4539  | 2976 | 4485 | 9455  | 6101  | 5395 | 3536 | 8881  | 9086  |
| 5535  | 3164 | 4497 | 10147 | 6349  | 5628 | 3624 | 8919  | 9266  |
| 6159  | 3205 | 4641 | 11161 | 6381  | 5878 | 3781 | 8939  | 9406  |
| 6844  | 3207 | 4771 | 11437 | 6573  | 5917 | 3791 | 9087  | 9416  |
| 8167  | 3222 | 4803 | 11492 | 8000  | 5934 | 3911 | 9323  | 9556  |
| 8616  | 3230 | 5147 | 11846 | 8132  | 6048 | 4020 | 9526  | 10614 |
| 9114  | 3557 | 5437 | 11892 | 8341  | 6441 | 4034 | 9601  | 10831 |
| 9546  | 3687 | 5677 | 13166 | 8462  | 6763 | 4043 | 9839  | 11623 |
| 10013 | 3713 | 5975 | 13639 | 8876  | 7020 | 4068 | 10347 | 12135 |
| 10216 | 3992 | 6040 | 13742 | 9548  | 7077 | 4224 | 10902 | 12360 |
| 10365 | 4276 | 6212 | 13751 | 9996  | 7124 | 4575 | 11072 | 12484 |
| 10571 | 4601 | 6241 | 14531 | 12492 | 7170 | 4606 | 11212 | 12536 |
| 10849 | 4634 | 6285 | 14825 | 12754 | 7253 | 4759 | 11376 | 13298 |
| 11401 | 4706 | 6323 | 15384 | 12784 | 7780 | 4932 | 11430 | 14096 |
| 11675 | 5287 | 7066 | 15566 | 14067 | 8022 | 4937 | 12048 | 14225 |
| 12042 | 5521 | 7466 | 15723 | 14199 | 8245 | 5225 | 12415 | 15522 |
| 12099 | 5579 | 7827 | 16070 | 14211 | 8366 | 5408 | 12558 | 15686 |
| 13071 | 6157 | 9010 | 16182 | 14399 | 8441 | 5493 | 12632 | 15747 |
| 13173 | 6217 | 9596 | 16629 | 14435 | 8562 | 5966 | 12668 | 15818 |
| 13216 | 6248 | 9597 | 17181 | 14600 | 8608 | 5968 | 12723 | 16099 |

|       |       |       |       |       |       |       |       |       |
|-------|-------|-------|-------|-------|-------|-------|-------|-------|
| 13368 | 6283  | 9605  | 17187 | 14647 | 8665  | 6049  | 14361 | 16149 |
| 13511 | 6363  | 9619  | 17383 | 14726 | 8848  | 6076  | 14571 | 16451 |
| 13669 | 6385  | 9738  | 17482 | 14867 | 8990  | 6749  | 14704 | 16536 |
| 13723 | 6389  | 9766  | 17614 | 15092 | 9024  | 6818  | 14923 | 17108 |
| 14737 | 6412  | 9941  | 17908 | 15546 | 9228  | 7423  | 15370 | 17172 |
| 14983 | 7465  | 11665 | 18116 | 15690 | 9402  | 7559  | 15420 | 17971 |
| 15362 | 7484  | 12366 | 18194 | 15803 | 10172 | 7598  | 15507 | 18263 |
| 15576 | 7600  | 12550 | 18904 | 16109 | 10888 | 7768  | 15605 | 18553 |
| 15925 | 7869  | 13134 | 18978 | 16619 | 12221 | 7781  | 15784 | 18603 |
| 16156 | 8079  | 13162 | 19052 | 17042 | 12423 | 8246  | 15786 | 18787 |
| 16431 | 8149  | 13175 |       | 18143 | 12599 | 8370  | 15813 | 18789 |
| 16459 | 8347  | 13276 |       | 18638 | 12609 | 8395  | 16501 |       |
| 16724 | 8358  | 13337 |       | 18675 | 13104 | 8571  | 16912 |       |
| 16731 | 8558  | 13499 |       | 18690 | 13192 | 8641  | 17870 |       |
| 16843 | 8618  | 13727 |       |       | 13489 | 8956  | 17934 |       |
| 17188 | 8802  | 14274 |       |       | 13603 | 9129  | 18442 |       |
| 17534 | 8989  | 14535 |       |       | 13881 | 9383  | 18558 |       |
| 17701 | 9170  | 14644 |       |       | 15043 | 9615  | 18621 |       |
| 17725 | 9244  | 14806 |       |       | 15207 | 9867  | 18640 |       |
| 17843 | 9265  | 14817 |       |       | 15655 | 9971  | 18845 |       |
| 17901 | 9876  | 15014 |       |       | 15657 | 10500 | 18949 |       |
| 17955 | 10012 | 15481 |       |       | 15787 | 10649 | 18952 |       |
| 17956 | 10208 | 15604 |       |       | 15792 | 10696 | 19124 |       |
| 17984 | 11093 | 15648 |       |       | 15928 | 11416 | 19135 |       |
| 18120 | 11660 | 15764 |       |       | 16116 | 11744 |       |       |
|       | 12072 | 16390 |       |       | 17407 | 11946 |       |       |
|       | 12175 | 16503 |       |       | 17493 | 12166 |       |       |
|       | 12383 | 16624 |       |       | 17554 | 12182 |       |       |
|       | 12524 | 16730 |       |       | 17654 | 12187 |       |       |
|       | 12845 | 16820 |       |       | 17911 | 12356 |       |       |
|       | 12871 | 17232 |       |       | 18088 | 12661 |       |       |
|       | 13033 | 17459 |       |       | 18295 | 12732 |       |       |
|       | 13253 | 17991 |       |       | 18412 | 12881 |       |       |
|       | 13288 | 18034 |       |       | 18903 | 12913 |       |       |
|       | 13409 | 18157 |       |       |       | 13254 |       |       |
|       | 13413 | 18158 |       |       |       | 13550 |       |       |
|       | 13420 | 18372 |       |       |       | 14248 |       |       |
|       | 13537 | 18403 |       |       |       | 14718 |       |       |
|       | 13606 | 18446 |       |       |       | 15963 |       |       |
|       | 14102 | 18717 |       |       |       | 16028 |       |       |
|       | 14109 | 18990 |       |       |       | 16239 |       |       |
|       | 14158 |       |       |       |       | 16303 |       |       |
|       | 14844 |       |       |       |       | 16631 |       |       |
|       | 14883 |       |       |       |       | 16656 |       |       |
|       | 15587 |       |       |       |       | 16767 |       |       |
|       | 15671 |       |       |       |       | 16961 |       |       |
|       | 15757 |       |       |       |       | 17260 |       |       |
|       | 15919 |       |       |       |       | 17310 |       |       |
|       | 16408 |       |       |       |       | 17371 |       |       |
|       | 16438 |       |       |       |       | 17671 |       |       |
|       | 16446 |       |       |       |       | 18112 |       |       |
|       | 16586 |       |       |       |       | 18307 |       |       |

16594  
16600  
16642  
17729  
17808  
17949  
18096  
18145  
18298  
18329  
18973  
19004

18670  
18819  
19168

|       |       |       |       |       |       |       |       |      |
|-------|-------|-------|-------|-------|-------|-------|-------|------|
| 61    | 2294  | 695   | 1443  | 1950  | 150   | 314   | 218   | 445  |
| 61    | 2294  | 695   | 1443  | 1950  | 150   | 314   | 218   | 445  |
| 281   | 2380  | 1412  | 2785  | 2002  | 534   | 377   | 477   | 478  |
| 619   | 2519  | 2450  | 3482  | 2225  | 677   | 406   | 531   | 499  |
| 1594  | 2643  | 2525  | 4445  | 2364  | 1223  | 430   | 542   | 755  |
| 1978  | 2657  | 2637  | 5513  | 2469  | 2036  | 431   | 567   | 774  |
| 2001  | 2754  | 2724  | 6045  | 2961  | 2347  | 504   | 597   | 1203 |
| 2004  | 2919  | 3062  | 7019  | 3156  | 2565  | 514   | 1334  | 1315 |
| 2102  | 2990  | 3359  | 7531  | 3560  | 3360  | 520   | 1341  | 1319 |
| 2127  | 3003  | 4346  | 9151  | 3572  | 6335  | 729   | 2311  | 1340 |
| 2249  | 3141  | 6242  | 9298  | 3840  | 7153  | 880   | 2737  | 1351 |
| 2257  | 3345  | 6933  | 9380  | 3884  | 7921  | 885   | 3001  | 1356 |
| 2278  | 3429  | 7269  | 10055 | 4491  | 8062  | 930   | 3177  | 1437 |
| 2358  | 3595  | 7568  | 12049 | 4622  | 8742  | 993   | 3997  | 1446 |
| 2362  | 3604  | 7700  | 13156 | 4690  | 8752  | 1026  | 5949  | 1458 |
| 2757  | 3692  | 8093  | 13355 | 5389  | 9492  | 1109  | 6102  | 1462 |
| 2869  | 3842  | 8822  | 13520 | 5398  | 10356 | 1116  | 7012  | 1517 |
| 2884  | 3843  | 8965  | 13552 | 5540  | 10389 | 1170  | 7393  | 1519 |
| 3018  | 4003  | 9060  | 13558 | 5780  | 10782 | 1187  | 7575  | 1524 |
| 3145  | 4638  | 9213  | 14249 | 5937  | 11400 | 1194  | 9668  | 1569 |
| 3203  | 4728  | 9405  | 14676 | 8991  | 12026 | 1277  | 9699  | 1579 |
| 3298  | 4823  | 9438  | 14937 | 9082  | 12040 | 1308  | 9783  | 1590 |
| 3461  | 5226  | 11963 | 15417 | 9143  | 12077 | 1399  | 10030 | 1849 |
| 3776  | 5890  | 12333 | 15590 | 9453  | 12133 | 1438  | 10050 | 1982 |
| 3937  | 6161  | 12351 | 15704 | 11276 | 12184 | 1464  | 10249 | 1993 |
| 4265  | 6236  | 12821 | 15932 | 11876 | 12269 | 1596  | 10735 | 2065 |
| 4838  | 6307  | 12849 | 16465 | 13410 | 12761 | 1614  | 11066 | 2274 |
| 5338  | 6444  | 12857 | 16604 | 13521 | 13468 | 1676  | 11243 | 2275 |
| 6119  | 7435  | 12909 | 16847 | 13547 | 13674 | 1734  | 11267 | 2368 |
| 6902  | 7644  | 12993 | 17131 | 13579 | 13892 | 2700  | 11268 | 2402 |
| 6925  | 7752  | 13041 | 17273 | 13609 | 13910 | 2954  | 11359 | 2445 |
| 7557  | 8016  | 13428 | 17274 | 13776 | 14108 | 3139  | 11483 | 2577 |
| 7585  | 8145  | 13486 | 17278 | 13866 | 14231 | 3653  | 11713 | 2611 |
| 8005  | 8623  | 13635 | 17706 | 13878 | 14287 | 4425  | 11771 | 2696 |
| 8576  | 9033  | 14002 | 17770 | 14415 | 14380 | 5593  | 11797 | 2735 |
| 8772  | 9133  | 14325 | 17832 | 14580 | 14522 | 7022  | 11801 | 2764 |
| 8857  | 9432  | 14407 | 17890 | 14605 | 14648 | 7385  | 11817 | 2771 |
| 9008  | 9853  | 14496 | 18071 | 14877 | 14911 | 7983  | 11869 | 2774 |
| 9108  | 11159 | 14575 | 18795 | 14896 | 15167 | 7986  | 12012 | 2776 |
| 9271  | 11343 | 14633 | 19127 | 15246 | 15364 | 8046  | 12336 | 2798 |
| 9286  | 11374 | 14652 |       | 15589 | 15375 | 9067  | 12656 | 2944 |
| 9534  | 13093 | 14985 |       | 15677 | 15469 | 9698  | 12983 | 3181 |
| 9566  | 13396 | 15103 |       | 16025 | 15555 | 10017 | 13098 | 3237 |
| 10815 | 13725 | 15104 |       | 16455 | 15585 | 10057 | 13199 | 3313 |
| 11385 | 13941 | 15838 |       | 16909 | 15612 | 10075 | 13296 | 3533 |
| 12156 | 14970 | 15869 |       | 16932 | 15665 | 10078 | 13360 | 3598 |
| 12183 | 15099 | 16093 |       | 17370 | 15717 | 10079 | 13403 | 3622 |
| 12498 | 15197 | 16301 |       | 17416 | 15982 | 10128 | 13481 | 3916 |
| 12610 | 15205 | 16415 |       | 18031 | 16083 | 10161 | 14037 | 4012 |
| 12864 | 15267 | 16541 |       | 18405 | 16272 | 10188 | 14596 | 4247 |
| 12980 | 15306 | 16867 |       |       | 16590 | 10279 | 15918 | 4308 |
| 13075 | 15561 | 17167 |       |       | 16801 | 10330 | 16448 | 4576 |

|       |       |       |       |       |       |       |
|-------|-------|-------|-------|-------|-------|-------|
| 13791 | 15644 | 17538 | 16807 | 10361 | 16531 | 4583  |
| 13886 | 15726 | 17862 | 16819 | 10492 | 16597 | 4732  |
| 13974 | 15774 | 18020 | 16849 | 11181 | 16793 | 4740  |
| 14262 | 15972 | 18294 | 16876 | 11484 | 17536 | 4818  |
| 14326 | 16086 | 18387 | 16933 | 11605 | 18332 | 5116  |
| 14949 | 16206 | 19098 | 17002 | 11647 |       | 5202  |
| 15745 | 16494 |       | 17164 | 11745 |       | 5783  |
| 16060 | 16616 |       | 17509 | 11862 |       | 6463  |
| 16369 | 16746 |       | 17798 | 11870 |       | 6565  |
| 16429 | 16771 |       | 18056 | 11871 |       | 7496  |
| 16901 | 16878 |       | 18162 | 11882 |       | 7711  |
| 16967 | 17413 |       | 18469 | 11897 |       | 8804  |
| 17292 | 17607 |       | 18501 | 12306 |       | 9479  |
| 17869 | 18174 |       | 18545 | 12338 |       | 10383 |
| 18264 | 18207 |       | 18550 | 12412 |       | 10577 |
| 18618 | 18580 |       |       | 12554 |       | 10854 |
| 18691 | 18633 |       |       | 12642 |       | 11036 |
| 18736 | 18804 |       |       | 12666 |       | 11320 |
| 18817 |       |       |       | 12867 |       | 11616 |
| 18895 |       |       |       | 12953 |       | 11868 |
| 19072 |       |       |       | 12967 |       | 11925 |
|       |       |       |       | 12987 |       | 11953 |
|       |       |       |       | 13112 |       | 11956 |
|       |       |       |       | 13140 |       | 13066 |
|       |       |       |       | 13170 |       | 13074 |
|       |       |       |       | 13183 |       | 13218 |
|       |       |       |       | 13247 |       | 13307 |
|       |       |       |       | 13277 |       | 13342 |
|       |       |       |       | 13427 |       | 13364 |
|       |       |       |       | 14546 |       | 13631 |
|       |       |       |       | 14547 |       | 14131 |
|       |       |       |       | 14597 |       | 14482 |
|       |       |       |       | 14642 |       | 14554 |
|       |       |       |       | 15396 |       | 14609 |
|       |       |       |       | 15785 |       | 14743 |
|       |       |       |       | 16234 |       | 15044 |
|       |       |       |       | 16553 |       | 15858 |
|       |       |       |       | 16608 |       | 15880 |
|       |       |       |       | 16706 |       | 16330 |
|       |       |       |       | 16782 |       | 16699 |
|       |       |       |       | 16790 |       | 16715 |
|       |       |       |       | 17679 |       | 16783 |
|       |       |       |       | 17852 |       | 16865 |
|       |       |       |       | 17922 |       | 17857 |
|       |       |       |       | 17958 |       | 18091 |
|       |       |       |       | 17978 |       | 18179 |
|       |       |       |       | 18077 |       | 18502 |
|       |       |       |       | 18083 |       | 18706 |
|       |       |       |       | 18126 |       | 18945 |
|       |       |       |       | 18150 |       |       |
|       |       |       |       | 18224 |       |       |
|       |       |       |       | 18226 |       |       |

18228  
18229  
18357  
18359  
18877



|       |       |       |       |      |       |       |       |       |
|-------|-------|-------|-------|------|-------|-------|-------|-------|
| 731   | 118   | 288   | 216   | 472  | 212   | 47    | 593   | 697   |
| 731   | 118   | 288   | 216   | 472  | 212   | 47    | 593   | 697   |
| 1428  | 764   | 633   | 1689  | 1078 | 1397  | 490   | 629   | 1817  |
| 1445  | 2025  | 667   | 1995  | 1311 | 1804  | 557   | 668   | 2173  |
| 1476  | 2141  | 701   | 2042  | 1611 | 1826  | 1667  | 1687  | 2187  |
| 1576  | 2629  | 778   | 2076  | 1996 | 1832  | 2346  | 1894  | 2856  |
| 1618  | 2886  | 1539  | 2099  | 2014 | 1850  | 2692  | 2552  | 3504  |
| 1688  | 2948  | 1747  | 2157  | 2216 | 2010  | 3071  | 2814  | 3512  |
| 1761  | 3092  | 1933  | 2750  | 2300 | 2088  | 3290  | 2959  | 3728  |
| 2189  | 3197  | 2159  | 2881  | 2389 | 2430  | 3400  | 3631  | 3994  |
| 2496  | 3234  | 2330  | 2906  | 2614 | 2984  | 3433  | 4171  | 4109  |
| 2616  | 3374  | 2377  | 2927  | 2912 | 3019  | 3467  | 4274  | 4236  |
| 2697  | 3416  | 2410  | 3171  | 3101 | 3104  | 3668  | 4757  | 4643  |
| 2701  | 3600  | 2823  | 3344  | 3151 | 3350  | 4064  | 5047  | 5109  |
| 2729  | 3883  | 2827  | 3420  | 3282 | 3447  | 4223  | 5487  | 5765  |
| 2797  | 4227  | 2893  | 3558  | 3565 | 3577  | 4303  | 5809  | 6112  |
| 2901  | 4239  | 2964  | 3742  | 4119 | 3665  | 4426  | 6289  | 6487  |
| 3094  | 4459  | 2973  | 3841  | 4167 | 3744  | 4457  | 7081  | 6889  |
| 3170  | 4537  | 3195  | 3894  | 4351 | 3822  | 4490  | 7141  | 7109  |
| 3211  | 4567  | 3249  | 3990  | 4377 | 3850  | 4777  | 7474  | 7367  |
| 3309  | 4625  | 3376  | 4177  | 4380 | 3878  | 4924  | 7811  | 7428  |
| 3417  | 5124  | 3391  | 4304  | 4430 | 4147  | 5310  | 7826  | 7936  |
| 3609  | 5660  | 3395  | 4356  | 4495 | 4314  | 6201  | 8291  | 8319  |
| 3835  | 5739  | 3500  | 4375  | 4496 | 4486  | 6312  | 8581  | 8832  |
| 4010  | 5976  | 3526  | 4584  | 4662 | 4571  | 6437  | 8628  | 8929  |
| 4016  | 6097  | 3612  | 4778  | 4839 | 4587  | 6602  | 8887  | 8932  |
| 4018  | 6135  | 3698  | 4898  | 4879 | 4698  | 6927  | 9026  | 9017  |
| 4221  | 6396  | 4195  | 5046  | 4951 | 5213  | 8014  | 9124  | 9482  |
| 4409  | 7043  | 4362  | 5075  | 5127 | 5500  | 8344  | 9190  | 9558  |
| 4742  | 7526  | 4504  | 5138  | 5214 | 5797  | 8659  | 9377  | 9577  |
| 4797  | 7549  | 4988  | 5501  | 5276 | 5863  | 8924  | 9414  | 9617  |
| 4825  | 8236  | 5043  | 6050  | 5292 | 6081  | 9195  | 9498  | 12750 |
| 4862  | 9351  | 5227  | 6240  | 5491 | 6633  | 9294  | 9532  | 12827 |
| 5143  | 12747 | 5453  | 6473  | 5662 | 6962  | 9316  | 11054 | 13754 |
| 5641  | 13004 | 5946  | 6785  | 6330 | 7507  | 9459  | 11302 | 13782 |
| 5725  | 13528 | 5965  | 6898  | 6452 | 8170  | 11950 | 11927 | 14137 |
| 6232  | 13533 | 6062  | 6974  | 7000 | 8218  | 12177 | 12288 | 14853 |
| 6416  | 13568 | 6741  | 7225  | 7111 | 8286  | 12535 | 12350 | 14981 |
| 6958  | 14245 | 7174  | 7659  | 7471 | 8399  | 13204 | 13124 | 15116 |
| 6959  | 14615 | 7763  | 7758  | 7500 | 8424  | 13280 | 13493 | 15269 |
| 7096  | 15042 | 7778  | 7848  | 7822 | 8452  | 13436 | 13634 | 15503 |
| 7454  | 15070 | 8121  | 8025  | 8164 | 8502  | 13507 | 13799 | 15679 |
| 7674  | 15143 | 8331  | 8443  | 8353 | 8668  | 13835 | 14774 | 15901 |
| 8015  | 15453 | 8336  | 8858  | 8365 | 9001  | 14272 | 15079 | 15948 |
| 9737  | 15964 | 8664  | 8905  | 8472 | 9109  | 14277 | 15110 | 16222 |
| 10225 | 16481 | 8903  | 8942  | 8651 | 9221  | 14507 | 15125 | 16302 |
| 10239 | 16736 | 9127  | 9011  | 8933 | 9344  | 14697 | 15248 | 16461 |
| 10350 | 16791 | 9335  | 9211  | 8987 | 9544  | 14845 | 16071 | 16490 |
| 10562 | 17206 | 9607  | 9376  | 9145 | 11510 | 14872 | 16544 | 16614 |
| 10817 | 17263 | 9720  | 9381  | 9146 | 12234 | 15337 | 16833 | 17233 |
| 11011 | 17270 | 10179 | 11160 | 9297 | 12396 | 15842 | 16928 | 17266 |
| 11188 | 17566 | 10327 | 11961 | 9350 | 12405 | 15979 | 17138 | 17825 |



|       |       |       |       |       |       |      |      |       |
|-------|-------|-------|-------|-------|-------|------|------|-------|
| 2388  | 1183  | 1650  | 1046  | 133   | 289   | 206  | 596  | 257   |
| 2388  | 1183  | 1650  | 1046  | 133   | 289   | 206  | 596  | 257   |
| 2605  | 2911  | 2665  | 2145  | 157   | 399   | 527  | 1298 | 588   |
| 2749  | 3353  | 3813  | 2460  | 474   | 412   | 568  | 1377 | 1407  |
| 2867  | 3782  | 3899  | 3082  | 523   | 622   | 643  | 1429 | 1550  |
| 4139  | 4033  | 4405  | 3348  | 620   | 765   | 690  | 1495 | 1723  |
| 4379  | 4738  | 5829  | 4049  | 670   | 1091  | 717  | 1498 | 1787  |
| 4749  | 5055  | 5927  | 4159  | 1248  | 1186  | 742  | 1612 | 1822  |
| 4828  | 5454  | 6446  | 5128  | 1291  | 1388  | 768  | 1712 | 1917  |
| 4865  | 5573  | 7979  | 5778  | 1292  | 1565  | 1196 | 1731 | 1936  |
| 5171  | 5680  | 9206  | 5892  | 1302  | 1646  | 1321 | 1732 | 2061  |
| 5344  | 5819  | 9272  | 6428  | 1350  | 2290  | 1359 | 2035 | 2172  |
| 5781  | 5921  | 10550 | 6761  | 1537  | 2511  | 1403 | 2218 | 2318  |
| 5835  | 5969  | 11890 | 7710  | 2478  | 2705  | 1879 | 2270 | 2804  |
| 6560  | 6047  | 13655 | 9925  | 2563  | 2720  | 2128 | 2423 | 3054  |
| 7123  | 6219  | 13666 | 11209 | 3950  | 2744  | 2205 | 2434 | 3553  |
| 7357  | 6317  | 14025 | 12242 | 4333  | 2801  | 2260 | 2514 | 4163  |
| 7469  | 6582  | 14235 | 12361 | 5306  | 2860  | 2520 | 2534 | 4179  |
| 7473  | 7052  | 14671 | 12442 | 6977  | 3086  | 2568 | 2613 | 4208  |
| 7646  | 7316  | 15390 | 12565 | 8098  | 3209  | 2617 | 2793 | 4358  |
| 7754  | 7666  | 15519 | 12721 | 8977  | 3703  | 2627 | 2811 | 4512  |
| 7901  | 7776  | 15613 | 13213 | 9634  | 4873  | 2689 | 2854 | 4626  |
| 7961  | 7867  | 15709 | 13714 | 9636  | 5787  | 2747 | 2941 | 4785  |
| 7985  | 7873  | 16341 | 13765 | 9638  | 6021  | 2803 | 3047 | 4929  |
| 8080  | 7926  | 16997 | 13832 | 9647  | 7313  | 2915 | 3169 | 5117  |
| 8591  | 8138  | 17636 | 13882 | 9723  | 8326  | 3022 | 3175 | 5194  |
| 8811  | 8172  | 17720 | 13938 | 9750  | 9362  | 3046 | 3527 | 5546  |
| 8872  | 8283  | 17820 | 13950 | 9786  | 9705  | 3118 | 3737 | 5685  |
| 8877  | 8725  | 18018 | 14068 | 9787  | 9785  | 3149 | 3755 | 6160  |
| 8904  | 8773  | 18493 | 14092 | 9788  | 9995  | 3180 | 4081 | 6181  |
| 9564  | 8996  |       | 14142 | 9929  | 10104 | 3198 | 4266 | 6183  |
| 9764  | 9005  |       | 15470 | 9953  | 10237 | 3214 | 4302 | 6485  |
| 9998  | 9125  |       | 15952 | 9981  | 10425 | 3241 | 4461 | 6906  |
| 10312 | 9239  |       | 16143 | 10081 | 10570 | 3647 | 4522 | 7028  |
| 10734 | 9439  |       | 16289 | 10086 | 10773 | 3939 | 4591 | 7205  |
| 12165 | 9444  |       | 16296 | 10100 | 10981 | 3972 | 4769 | 7351  |
| 12237 | 9488  |       | 16419 | 10127 | 11125 | 4476 | 4981 | 7720  |
| 13753 | 11408 |       | 16450 | 10131 | 11146 | 4595 | 5039 | 7767  |
| 13973 | 12120 |       | 16711 | 10132 | 11155 | 4679 | 5222 | 8357  |
| 14042 | 12206 |       | 16834 | 10294 | 11303 | 4901 | 5285 | 9267  |
| 14331 | 12278 |       | 16871 | 10308 | 11490 | 4968 | 5413 | 9518  |
| 14819 | 12287 |       | 17102 | 10364 | 11551 | 5012 | 5426 | 9948  |
| 14835 | 12331 |       | 17620 | 10484 | 11654 | 5176 | 6105 | 10273 |
| 15156 | 12464 |       | 18123 | 10493 | 11661 | 5401 | 6245 | 10662 |
| 15758 | 12482 |       | 19086 | 10628 | 11851 | 5412 | 6400 | 10694 |
| 15824 | 12836 |       |       | 10716 | 11860 | 5459 | 6989 | 12467 |
| 16154 | 13637 |       |       | 10720 | 11891 | 5580 | 7033 | 12796 |
| 16179 | 13663 |       |       | 10748 | 11914 | 5951 | 7178 | 12944 |
| 16804 | 13697 |       |       | 10752 | 11917 | 6187 | 7305 | 12958 |
| 17362 | 13812 |       |       | 10807 | 12000 | 6218 | 7572 | 13334 |
| 17598 | 13951 |       |       | 10923 | 12392 | 6262 | 7831 | 13345 |
| 17625 | 13958 |       |       | 10948 | 12822 | 6378 | 8943 | 13491 |

|       |       |       |       |       |       |       |
|-------|-------|-------|-------|-------|-------|-------|
| 17715 | 14063 | 10953 | 13138 | 6626  | 9050  | 13496 |
| 17765 | 14303 | 11001 | 13508 | 6954  | 9781  | 13497 |
| 17827 | 14595 | 11099 | 14450 | 7045  | 10228 | 14041 |
| 18615 | 14727 | 11334 | 14659 | 7366  | 10256 | 14071 |
| 18859 | 15168 | 11346 | 14663 | 7492  | 10687 | 14083 |
| 18984 | 15563 | 11358 | 14710 | 8986  | 11235 | 14187 |
|       | 15809 | 11393 | 15316 | 9449  | 11378 | 14224 |
|       | 15890 | 11539 | 15401 | 9703  | 12019 | 14298 |
|       | 15976 | 11547 | 16298 | 9727  | 12144 | 14556 |
|       | 16129 | 11658 | 16556 | 9779  | 12497 | 14572 |
|       | 16140 | 11774 | 16644 | 9812  | 12594 | 14918 |
|       | 16720 | 11804 | 16848 | 9862  | 12621 | 15687 |
|       | 16984 | 11896 | 18343 | 9891  | 12742 | 15915 |
|       | 17646 | 11924 | 18367 | 9938  | 12820 | 16027 |
|       | 18611 | 12101 |       | 10207 | 13131 | 16228 |
|       | 18996 | 12326 |       | 10382 | 13611 | 16565 |
|       |       | 12519 |       | 10410 | 13624 | 16762 |
|       |       | 12588 |       | 10541 | 13682 | 16854 |
|       |       | 12629 |       | 10615 | 13982 | 16952 |
|       |       | 12711 |       | 10820 | 14048 | 17007 |
|       |       | 13246 |       | 11019 | 14135 | 17026 |
|       |       | 13258 |       | 11163 | 14299 | 17157 |
|       |       | 13388 |       | 11189 | 14300 | 17427 |
|       |       | 13395 |       | 11231 | 14359 | 17454 |
|       |       | 13447 |       | 11578 | 14489 | 17495 |
|       |       | 13539 |       | 11581 | 14527 | 17503 |
|       |       | 13623 |       | 11671 | 15018 | 17993 |
|       |       | 14342 |       | 11672 | 15041 | 18066 |
|       |       | 14510 |       | 11982 | 15738 | 18166 |
|       |       | 14543 |       | 12446 | 15874 | 18841 |
|       |       | 14885 |       | 12494 | 15954 |       |
|       |       | 14968 |       | 12518 | 16101 |       |
|       |       | 15173 |       | 12551 | 16142 |       |
|       |       | 16155 |       | 12663 | 16249 |       |
|       |       | 16213 |       | 12790 | 16471 |       |
|       |       | 16386 |       | 12832 | 16482 |       |
|       |       | 16409 |       | 12869 | 16851 |       |
|       |       | 16440 |       | 12933 | 17863 |       |
|       |       | 16563 |       | 12982 | 17912 |       |
|       |       | 16841 |       | 13108 | 17963 |       |
|       |       | 17782 |       | 13232 | 17968 |       |
|       |       | 17927 |       | 13328 | 18156 |       |
|       |       | 17979 |       | 13455 | 18371 |       |
|       |       | 18037 |       | 13492 | 18847 |       |
|       |       | 18087 |       | 13928 | 18864 |       |
|       |       | 18102 |       | 13969 | 19065 |       |
|       |       | 18203 |       | 14044 |       |       |
|       |       | 18209 |       | 14147 |       |       |
|       |       | 18250 |       | 14297 |       |       |
|       |       | 18352 |       | 14312 |       |       |
|       |       | 18353 |       | 14665 |       |       |
|       |       | 18355 |       | 14827 |       |       |

18839  
18982

14945  
14946  
15059  
15583  
16292  
16566  
16677  
17909  
18180  
18187

|       |      |      |       |       |       |       |      |      |
|-------|------|------|-------|-------|-------|-------|------|------|
| 292   | 372  | 190  | 1393  | 1322  | 1651  | 1621  | 2601 | 2723 |
| 292   | 372  | 190  | 1393  | 1322  | 1651  | 1621  | 2601 | 2723 |
| 632   | 714  | 321  | 1675  | 1421  | 1704  | 1749  | 2660 | 3438 |
| 1628  | 1369 | 1217 | 1828  | 1485  | 2049  | 2298  | 2738 | 3727 |
| 1753  | 1402 | 1278 | 1835  | 1558  | 2118  | 2299  | 2841 | 4071 |
| 1948  | 1602 | 1601 | 1876  | 1924  | 2584  | 4091  | 3052 | 4111 |
| 2000  | 1802 | 1672 | 2052  | 2195  | 2658  | 4143  | 4096 | 4112 |
| 2273  | 1805 | 1728 | 2579  | 2653  | 2996  | 4357  | 4128 | 4154 |
| 2828  | 1928 | 1937 | 2585  | 2802  | 3070  | 4554  | 4173 | 4292 |
| 3130  | 1929 | 1960 | 3059  | 2933  | 3379  | 4736  | 4255 | 4309 |
| 3168  | 2387 | 2400 | 3325  | 3155  | 3431  | 5053  | 4272 | 4555 |
| 3443  | 2459 | 2437 | 3525  | 3225  | 3445  | 5073  | 4300 | 4596 |
| 3455  | 2582 | 2722 | 3551  | 3341  | 3582  | 5192  | 4470 | 4636 |
| 3860  | 2815 | 2782 | 3887  | 3384  | 4814  | 5206  | 4549 | 4637 |
| 4007  | 2844 | 2905 | 3995  | 3439  | 5112  | 5457  | 4655 | 5148 |
| 4268  | 2939 | 2983 | 4099  | 3607  | 5402  | 5488  | 4707 | 5181 |
| 4616  | 2958 | 3013 | 4120  | 3686  | 5675  | 5590  | 5027 | 5188 |
| 4656  | 2965 | 3075 | 4178  | 3714  | 5770  | 5740  | 5068 | 5268 |
| 4961  | 3109 | 3107 | 4615  | 3849  | 5806  | 5776  | 5087 | 5298 |
| 5049  | 3146 | 3110 | 4631  | 3877  | 6322  | 5826  | 5093 | 5384 |
| 5406  | 3266 | 3258 | 4663  | 4140  | 6374  | 6380  | 5164 | 5478 |
| 5424  | 3328 | 3441 | 4699  | 4633  | 6852  | 6724  | 5369 | 5710 |
| 5472  | 3406 | 3532 | 4754  | 4653  | 7533  | 6841  | 5519 | 5729 |
| 6088  | 3418 | 3630 | 4950  | 4724  | 7550  | 7155  | 5578 | 5837 |
| 6092  | 3584 | 3723 | 4982  | 4811  | 7852  | 7342  | 5625 | 5838 |
| 6383  | 3858 | 4098 | 5019  | 5099  | 8053  | 7636  | 5648 | 5839 |
| 6486  | 4136 | 4118 | 5279  | 6059  | 8928  | 8179  | 5752 | 5867 |
| 6659  | 4157 | 4216 | 5352  | 6189  | 9268  | 8957  | 5814 | 5886 |
| 7041  | 4197 | 4237 | 5529  | 7091  | 9331  | 9599  | 5854 | 5898 |
| 7121  | 4318 | 4315 | 6216  | 7240  | 9337  | 9682  | 5875 | 5974 |
| 7192  | 4437 | 4422 | 6509  | 8117  | 11084 | 9709  | 5912 | 6057 |
| 7210  | 5009 | 4538 | 6642  | 8122  | 12381 | 9715  | 6039 | 6260 |
| 7376  | 5121 | 4906 | 6812  | 8135  | 12466 | 11177 | 6145 | 6306 |
| 7456  | 5497 | 4912 | 6870  | 8216  | 12620 | 11497 | 6174 | 6492 |
| 7629  | 5683 | 4954 | 6903  | 8259  | 12846 | 12168 | 6200 | 6495 |
| 7692  | 5705 | 5341 | 6996  | 9147  | 13181 | 12365 | 6538 | 6562 |
| 8175  | 5709 | 5600 | 7242  | 9212  | 13440 | 12375 | 6704 | 6578 |
| 8868  | 5794 | 5860 | 7539  | 9433  | 13501 | 12522 | 6777 | 6586 |
| 9289  | 5869 | 5877 | 7590  | 11786 | 13662 | 12576 | 7082 | 6587 |
| 9306  | 6004 | 5980 | 8162  | 11983 | 13953 | 12627 | 7291 | 6597 |
| 9894  | 6011 | 6211 | 8315  | 12090 | 13992 | 12749 | 7379 | 6702 |
| 9900  | 6139 | 6837 | 8360  | 12347 | 14074 | 13390 | 7389 | 6806 |
| 10238 | 6742 | 7008 | 8446  | 12506 | 14936 | 13743 | 7396 | 6932 |
| 10243 | 6811 | 7050 | 8830  | 12507 | 15115 | 13841 | 7479 | 6980 |
| 10980 | 7203 | 7262 | 8878  | 12677 | 15134 | 13975 | 7844 | 7063 |
| 10988 | 7400 | 7324 | 8910  | 12910 | 15381 | 14035 | 8383 | 7289 |
| 11058 | 7459 | 7358 | 9015  | 13117 | 15387 | 14126 | 8427 | 7411 |
| 11689 | 7660 | 7876 | 9283  | 13297 | 15728 | 14167 | 8482 | 7458 |
| 12487 | 7913 | 7899 | 9395  | 13350 | 15830 | 14236 | 8818 | 7657 |
| 13069 | 8411 | 8120 | 9511  | 13380 | 16132 | 14511 | 8849 | 7664 |
| 13643 | 8526 | 8476 | 9514  | 13806 | 16376 | 14598 | 8864 | 7697 |
| 13644 | 9150 | 8890 | 10596 | 15152 | 16813 | 15251 | 8971 | 7728 |

|       |       |       |       |       |       |       |       |       |
|-------|-------|-------|-------|-------|-------|-------|-------|-------|
| 13867 | 9240  | 8968  | 10801 | 15154 | 17261 | 16214 | 8978  | 7750  |
| 14163 | 9308  | 8970  | 11527 | 15184 | 17349 | 16224 | 9073  | 7790  |
| 14278 | 9329  | 8982  | 11884 | 15439 | 18058 | 16428 | 9253  | 7843  |
| 14357 | 9340  | 8993  | 12515 | 15733 | 18392 | 16640 | 9652  | 7954  |
| 14395 | 9430  | 9007  | 12608 | 16283 |       | 16809 | 9916  | 8064  |
| 14423 | 9445  | 9077  | 12634 | 16402 |       | 16839 | 9982  | 8196  |
| 14565 | 9464  | 9214  | 12690 | 16467 |       | 16856 | 11130 | 8198  |
| 15236 | 9574  | 9226  | 13184 | 16491 |       | 17145 | 11928 | 8294  |
| 15684 | 9576  | 9251  | 13196 | 16500 |       |       | 12107 | 8318  |
| 15724 | 9752  | 9292  | 13529 | 17276 |       |       | 12119 | 8343  |
| 15743 | 11037 | 9299  | 13595 | 17336 |       |       | 12196 | 8841  |
| 16554 | 11659 | 9317  | 13747 | 17425 |       |       | 13661 | 8894  |
| 17134 | 11793 | 9324  | 14379 | 17432 |       |       | 13728 | 8906  |
| 17217 | 12188 | 9431  | 14457 | 17513 |       |       | 13858 | 9085  |
| 17352 | 12219 | 9436  | 14488 | 17529 |       |       | 14008 | 9135  |
| 17385 | 12305 | 9515  | 15194 | 17728 |       |       | 14039 | 9189  |
| 17397 | 12332 | 9897  | 15215 | 17803 |       |       | 14295 | 9295  |
| 17931 | 12455 | 11194 | 15467 | 17944 |       |       | 14405 | 9429  |
| 17940 | 12657 | 11648 | 15647 | 17989 |       |       | 14729 | 9480  |
| 18368 | 12777 | 13038 | 15978 | 18306 |       |       | 14761 | 9678  |
| 18417 | 12778 | 13405 | 16187 | 18316 |       |       | 15186 | 9822  |
| 18509 | 13884 | 14038 | 16778 | 18338 |       |       | 15249 | 9945  |
| 18551 | 14213 | 14095 | 17114 | 18436 |       |       | 15669 | 10284 |
| 18596 | 14428 | 14114 | 17751 | 18833 |       |       | 15736 | 10421 |
| 18896 | 14499 | 14155 | 17781 | 18879 |       |       | 15894 | 11114 |
| 18969 | 15039 | 14243 | 17950 | 18988 |       |       | 16205 | 11222 |
|       | 15146 | 14267 | 18046 | 19078 |       |       | 16278 | 11440 |
|       | 15873 | 14381 | 18163 | 19126 |       |       | 16336 | 12080 |
|       | 16392 | 14419 | 18719 | 19130 |       |       | 16810 | 12118 |
|       | 16395 | 14439 | 18792 |       |       |       | 17004 | 12170 |
|       | 16400 | 14688 | 19013 |       |       |       | 18529 | 12235 |
|       | 16681 | 14891 | 19100 |       |       |       | 18823 | 12311 |
|       | 17308 | 15074 |       |       |       |       | 19172 | 12705 |
|       | 17351 | 15232 |       |       |       |       |       | 12763 |
|       | 17409 | 15301 |       |       |       |       |       | 13698 |
|       | 17935 | 15660 |       |       |       |       |       | 13784 |
|       | 18130 | 15863 |       |       |       |       |       | 13830 |
|       | 18189 | 15945 |       |       |       |       |       | 14140 |
|       | 18271 | 16162 |       |       |       |       |       | 14283 |
|       | 18290 | 16356 |       |       |       |       |       | 14328 |
|       | 18541 | 16371 |       |       |       |       |       | 14347 |
|       | 18657 | 16520 |       |       |       |       |       | 14521 |
|       | 18700 | 16652 |       |       |       |       |       | 14624 |
|       | 18811 | 16684 |       |       |       |       |       | 14632 |
|       | 18842 | 17369 |       |       |       |       |       | 14680 |
|       | 18907 | 17394 |       |       |       |       |       | 14887 |
|       | 18918 | 17476 |       |       |       |       |       | 15239 |
|       | 18950 | 17591 |       |       |       |       |       | 15240 |
|       | 18956 | 17822 |       |       |       |       |       | 15242 |
|       | 19016 | 17881 |       |       |       |       |       | 15244 |
|       |       | 17996 |       |       |       |       |       | 15259 |
|       |       | 18373 |       |       |       |       |       | 15290 |

18459  
18671  
18977

15435  
15437  
15446  
15496  
15548  
15794  
15822  
16145  
16174  
16270  
16299  
16422  
16707  
16955  
17373  
17474



|       |       |       |       |       |      |      |      |      |
|-------|-------|-------|-------|-------|------|------|------|------|
| 2484  | 1678  | 139   | 44    | 117   | 183  | 1695 | 202  | 296  |
| 2484  | 1678  | 139   | 44    | 117   | 183  | 1695 | 202  | 296  |
| 3357  | 2488  | 217   | 73    | 496   | 361  | 1741 | 268  | 443  |
| 4151  | 2932  | 308   | 102   | 1276  | 1184 | 1776 | 402  | 486  |
| 4211  | 3735  | 316   | 199   | 1447  | 1213 | 1825 | 452  | 488  |
| 4252  | 4086  | 373   | 353   | 1730  | 1244 | 1859 | 757  | 547  |
| 4899  | 4087  | 395   | 501   | 1768  | 1589 | 1911 | 785  | 573  |
| 5368  | 4094  | 424   | 525   | 1977  | 1624 | 1942 | 1643 | 604  |
| 5505  | 4273  | 483   | 554   | 1999  | 1645 | 2549 | 1699 | 613  |
| 5859  | 4275  | 506   | 606   | 2089  | 1940 | 2594 | 1722 | 665  |
| 5961  | 4386  | 512   | 623   | 2093  | 2017 | 2740 | 1824 | 792  |
| 6000  | 4411  | 784   | 883   | 2403  | 2024 | 2989 | 1837 | 1123 |
| 6350  | 4719  | 849   | 1235  | 2510  | 2396 | 3202 | 1969 | 1685 |
| 6569  | 4984  | 1157  | 1460  | 2513  | 2531 | 3415 | 2021 | 1724 |
| 6676  | 5195  | 1368  | 1475  | 2789  | 2537 | 3421 | 2374 | 1973 |
| 7177  | 5239  | 1453  | 1555  | 2974  | 2583 | 3449 | 2533 | 2183 |
| 7338  | 5274  | 2204  | 1668  | 2979  | 2632 | 3549 | 3425 | 2192 |
| 7355  | 5475  | 2266  | 2031  | 3066  | 2790 | 3651 | 3539 | 2340 |
| 7432  | 5652  | 2486  | 2432  | 3120  | 2805 | 3789 | 3725 | 2449 |
| 7757  | 5679  | 2600  | 2573  | 3269  | 2889 | 3806 | 3797 | 2548 |
| 7924  | 5730  | 2891  | 2833  | 3693  | 2916 | 3831 | 4122 | 2855 |
| 8109  | 5788  | 2978  | 3336  | 3837  | 3499 | 4004 | 4198 | 2873 |
| 8126  | 5803  | 3154  | 3903  | 4130  | 3836 | 4065 | 4200 | 2880 |
| 8176  | 5915  | 4101  | 3964  | 4339  | 3890 | 4331 | 4761 | 2938 |
| 8338  | 5924  | 4402  | 4000  | 4450  | 4232 | 4442 | 4923 | 3015 |
| 8403  | 5928  | 4686  | 4059  | 4525  | 4326 | 4502 | 5123 | 3185 |
| 8458  | 5962  | 6355  | 4190  | 4816  | 4359 | 4725 | 5209 | 3189 |
| 8915  | 5988  | 6477  | 4829  | 5036  | 4364 | 4764 | 5266 | 3289 |
| 9053  | 5996  | 6629  | 5383  | 5232  | 4558 | 5155 | 5302 | 3412 |
| 9149  | 6037  | 6637  | 5842  | 5484  | 4593 | 5251 | 5385 | 3573 |
| 9157  | 6138  | 9313  | 6829  | 6388  | 5183 | 5269 | 5425 | 3910 |
| 9185  | 6171  | 9672  | 6961  | 7635  | 5237 | 5440 | 5631 | 4054 |
| 9231  | 6347  | 9728  | 9635  | 7981  | 5278 | 5670 | 5964 | 4170 |
| 9343  | 6432  | 9776  | 9643  | 9333  | 5297 | 5789 | 6083 | 4174 |
| 9357  | 6511  | 9817  | 9689  | 9630  | 5333 | 5955 | 6141 | 4257 |
| 9522  | 6516  | 9933  | 9757  | 10085 | 5403 | 6213 | 6167 | 4581 |
| 10412 | 6687  | 9934  | 9760  | 10316 | 5411 | 6272 | 6599 | 5533 |
| 10811 | 6807  | 9956  | 9937  | 10396 | 5665 | 6293 | 6774 | 5568 |
| 11436 | 6884  | 9994  | 10016 | 10573 | 5689 | 6319 | 6944 | 5720 |
| 12147 | 6900  | 10080 | 10101 | 10992 | 5817 | 6337 | 7010 | 5821 |
| 12580 | 7179  | 10099 | 10142 | 11087 | 5824 | 6525 | 7065 | 5986 |
| 12771 | 7352  | 10112 | 10199 | 11088 | 5932 | 6709 | 7157 | 6297 |
| 13352 | 7653  | 10363 | 10223 | 11148 | 6012 | 6738 | 7327 | 6440 |
| 13566 | 7714  | 10393 | 10250 | 11239 | 6256 | 6920 | 7330 | 6577 |
| 13778 | 7849  | 10435 | 10252 | 11641 | 6376 | 7106 | 7677 | 6821 |
| 13800 | 7995  | 10459 | 10433 | 11656 | 6661 | 7206 | 7727 | 6859 |
| 13926 | 8030  | 10460 | 10802 | 11681 | 6770 | 7377 | 7744 | 6890 |
| 13978 | 8129  | 10485 | 10894 | 11716 | 7440 | 7415 | 7813 | 7249 |
| 14230 | 8155  | 10518 | 11010 | 11721 | 7488 | 8151 | 8225 | 7292 |
| 14291 | 9092  | 10543 | 11150 | 11812 | 7565 | 8529 | 8261 | 7614 |
| 14341 | 9712  | 10600 | 11314 | 12121 | 7599 | 8538 | 8281 | 7898 |
| 14351 | 11322 | 10657 | 11505 | 12255 | 7724 | 8786 | 8497 | 8071 |

|       |       |       |       |       |       |       |       |       |
|-------|-------|-------|-------|-------|-------|-------|-------|-------|
| 14364 | 11434 | 10686 | 11664 | 12530 | 8106  | 10211 | 8817  | 8425  |
| 14388 | 12148 | 10688 | 11674 | 12586 | 8509  | 10403 | 8834  | 8525  |
| 14878 | 12194 | 10749 | 11704 | 12587 | 8593  | 10723 | 9022  | 8567  |
| 15268 | 12315 | 10776 | 11719 | 12685 | 9243  | 10947 | 9559  | 8826  |
| 15295 | 12374 | 10832 | 11770 | 12773 | 9450  | 11164 | 9690  | 8888  |
| 15438 | 13009 | 11097 | 11836 | 13426 | 9626  | 11464 | 9696  | 9027  |
| 15489 | 13155 | 11208 | 11840 | 13627 | 9665  | 11693 | 9739  | 9217  |
| 15531 | 13718 | 11295 | 11877 | 14089 | 10204 | 11785 | 9743  | 9234  |
| 15977 | 13943 | 11315 | 12002 | 14458 | 10561 | 11885 | 9804  | 9282  |
| 16088 | 14046 | 11418 | 12015 | 14690 | 10612 | 12017 | 10035 | 9581  |
| 16105 | 14305 | 11595 | 12264 | 14746 | 10824 | 12193 | 10248 | 9582  |
| 16108 | 14398 | 11599 | 12474 | 14868 | 11405 | 12348 | 10414 | 9633  |
| 16147 | 14402 | 11819 | 12566 | 14965 | 11600 | 12431 | 10557 | 9704  |
| 16210 | 14431 | 11923 | 12590 | 15029 | 11954 | 12528 | 10848 | 9871  |
| 16291 | 14722 | 12006 | 12601 | 15032 | 12100 | 12718 | 11006 | 10757 |
| 16609 | 14745 | 12378 | 12624 | 15332 | 12102 | 12782 | 11123 | 10870 |
| 16991 | 15171 | 12390 | 12802 | 15598 | 12138 | 12911 | 11156 | 11117 |
| 17762 | 15265 | 12475 | 12841 | 16096 | 12207 | 13404 | 11157 | 11132 |
| 18345 | 15355 | 12932 | 13102 | 16504 | 12295 | 13469 | 11562 | 11517 |
| 18775 | 15432 | 12985 | 13182 | 17024 | 12304 | 13531 | 11635 | 11612 |
|       | 15691 | 13048 | 13398 |       | 12521 | 13987 | 11684 | 11949 |
|       | 16106 | 13068 | 13402 |       | 12575 | 14138 | 11731 | 12105 |
|       | 16196 | 13250 | 13988 |       | 12578 | 14197 | 11766 | 12298 |
|       | 16245 | 13332 | 14013 |       | 12592 | 14269 | 11792 | 12358 |
|       | 16343 | 13389 | 14684 |       | 12724 | 14372 | 11824 | 12399 |
|       | 16434 | 13599 | 14712 |       | 13207 | 14394 | 12094 | 12444 |
|       | 16802 | 13620 | 14855 |       | 13289 | 15102 | 12195 | 12471 |
|       | 16808 | 13672 | 15876 |       | 13363 | 15144 | 12561 | 13148 |
|       | 16870 | 14110 | 16178 |       | 13474 | 15253 | 12615 | 13222 |
|       | 17040 | 14711 | 16333 |       | 13626 | 15254 | 12781 | 13327 |
|       | 17240 | 14770 | 16596 |       | 13996 | 15408 | 12905 | 13460 |
|       | 17618 | 14841 | 16611 |       | 14097 | 15560 | 13845 | 14077 |
|       | 18571 | 14856 | 17496 |       | 14152 | 15911 | 13893 | 14203 |
|       |       | 14914 | 17805 |       | 14180 | 16006 | 14136 | 14286 |
|       |       | 14947 | 18016 |       | 14239 | 16354 | 14181 | 14370 |
|       |       | 15199 | 18060 |       | 14275 | 16507 | 14315 | 14576 |
|       |       | 15312 | 18227 |       | 14406 | 16923 | 14625 | 14938 |
|       |       | 15426 | 19006 |       | 14601 | 16924 | 15035 | 15180 |
|       |       | 15599 |       |       | 14606 | 17122 | 15178 | 15493 |
|       |       | 16089 |       |       | 14623 | 17241 | 15776 | 15526 |
|       |       | 16325 |       |       | 14830 | 17290 | 15975 | 15611 |
|       |       | 16388 |       |       | 15083 | 17550 | 16164 | 15630 |
|       |       | 16411 |       |       | 15106 | 17586 | 17420 | 15755 |
|       |       | 16499 |       |       | 15130 | 18041 | 17501 | 15881 |
|       |       | 16613 |       |       | 15479 | 18210 | 17562 | 16011 |
|       |       | 16643 |       |       | 15768 | 18213 | 17579 | 16443 |
|       |       | 16708 |       |       | 15892 | 18632 | 17661 | 16514 |
|       |       | 16761 |       |       | 16340 | 18652 | 18948 | 16687 |
|       |       | 16927 |       |       | 16475 | 18673 | 19066 | 16765 |
|       |       | 17674 |       |       | 16740 | 18939 | 19164 | 17119 |
|       |       | 18151 |       |       | 16868 | 19054 | 19170 | 17171 |
|       |       | 18202 |       |       | 17180 | 19110 | 19173 | 17224 |

18281  
18309

17366  
17523  
17733  
18186  
18686  
19029  
19088

17303  
17387  
17658  
17737  
17995  
18344  
18500  
18695  
19008

|      |       |       |       |       |      |       |       |       |
|------|-------|-------|-------|-------|------|-------|-------|-------|
| 392  | 341   | 1048  | 789   | 383   | 761  | 1666  | 65    | 1679  |
| 392  | 341   | 1048  | 789   | 383   | 761  | 1666  | 65    | 1679  |
| 398  | 1135  | 1527  | 1951  | 1692  | 1736 | 1775  | 1709  | 2116  |
| 694  | 1251  | 1634  | 2211  | 1744  | 2234 | 1827  | 2053  | 3470  |
| 750  | 1405  | 1677  | 2366  | 3084  | 2472 | 1896  | 4061  | 4103  |
| 1283 | 1577  | 1783  | 2807  | 3265  | 2507 | 2272  | 4134  | 4166  |
| 1543 | 1829  | 1793  | 3267  | 3318  | 3009 | 2576  | 4225  | 4382  |
| 1580 | 1889  | 1848  | 3347  | 3413  | 3260 | 3619  | 4270  | 4510  |
| 1595 | 2138  | 1892  | 3764  | 3756  | 3490 | 4144  | 4623  | 4523  |
| 1957 | 2481  | 1934  | 4021  | 3861  | 3882 | 4337  | 4922  | 5142  |
| 1983 | 2612  | 2240  | 4423  | 3920  | 3891 | 4565  | 5052  | 5308  |
| 1984 | 2638  | 2329  | 4819  | 4207  | 3931 | 4627  | 5108  | 5565  |
| 2163 | 2894  | 2490  | 4833  | 4955  | 4215 | 4751  | 5159  | 5715  |
| 2170 | 3031  | 2566  | 5051  | 4970  | 4373 | 4959  | 5229  | 5747  |
| 2348 | 3140  | 2610  | 5418  | 5504  | 4417 | 4983  | 5235  | 5941  |
| 2649 | 3220  | 3173  | 5508  | 5569  | 4548 | 5134  | 5397  | 6044  |
| 2728 | 3224  | 4327  | 6614  | 5812  | 4640 | 5172  | 5786  | 6721  |
| 2755 | 3261  | 4521  | 6616  | 6588  | 4714 | 5490  | 5840  | 6867  |
| 2778 | 3534  | 5018  | 7425  | 7136  | 4940 | 5523  | 5891  | 7299  |
| 2780 | 3541  | 5808  | 8260  | 7227  | 5008 | 5714  | 5938  | 7503  |
| 2781 | 3545  | 5873  | 8861  | 7835  | 5110 | 6110  | 6158  | 7535  |
| 2840 | 3546  | 6365  | 9809  | 7967  | 5131 | 6152  | 6253  | 7616  |
| 2952 | 3758  | 6983  | 10317 | 8182  | 5191 | 6230  | 6496  | 7676  |
| 3096 | 3779  | 7290  | 11211 | 8393  | 5293 | 6340  | 6549  | 7783  |
| 3142 | 3794  | 7594  | 11542 | 8465  | 5558 | 6370  | 6583  | 8210  |
| 3186 | 4001  | 7623  | 11580 | 8595  | 5760 | 6540  | 6675  | 8323  |
| 3372 | 4116  | 8266  | 11908 | 9802  | 5930 | 6677  | 7133  | 8412  |
| 3524 | 4258  | 8645  | 11960 | 9918  | 5958 | 6778  | 7359  | 8418  |
| 3554 | 4414  | 8671  | 12046 | 10201 | 6170 | 7142  | 7360  | 9013  |
| 3602 | 4517  | 9076  | 12424 | 10245 | 6372 | 7188  | 7489  | 9101  |
| 3629 | 4680  | 9153  | 12532 | 10828 | 6445 | 7461  | 7522  | 9767  |
| 3645 | 6901  | 9309  | 12653 | 11447 | 6546 | 7518  | 8444  | 9827  |
| 3845 | 6930  | 9557  | 13028 | 11536 | 6547 | 7897  | 9424  | 10683 |
| 3938 | 7486  | 9649  | 13208 | 11579 | 6557 | 7987  | 9486  | 12251 |
| 4176 | 7548  | 10255 | 13430 | 11900 | 6590 | 8268  | 9970  | 12261 |
| 4204 | 7963  | 10281 | 13628 | 12145 | 6644 | 8346  | 11234 | 12321 |
| 4547 | 8108  | 10632 | 13665 | 12200 | 6987 | 9198  | 11553 | 12819 |
| 4720 | 8152  | 10712 | 13692 | 12201 | 7035 | 9913  | 12456 | 13001 |
| 5161 | 8165  | 11725 | 14032 | 12244 | 7039 | 11143 | 14086 | 13664 |
| 5265 | 8388  | 12007 | 14149 | 12292 | 7293 | 11426 | 14141 | 13933 |
| 6197 | 8578  | 12211 | 14332 | 12652 | 7318 | 11839 | 14540 | 14217 |
| 6321 | 8682  | 12233 | 14382 | 12972 | 7870 | 11979 | 14541 | 14257 |
| 6813 | 9154  | 12651 | 14728 | 13375 | 8272 | 12014 | 15262 | 14390 |
| 7586 | 9204  | 12818 | 14912 | 13900 | 8340 | 12352 | 15434 | 14392 |
| 8006 | 9425  | 13008 | 15595 | 14177 | 8381 | 12426 | 15804 | 14807 |
| 8033 | 9542  | 13061 | 15606 | 14280 | 8655 | 12693 | 16107 | 15120 |
| 8092 | 9823  | 13349 | 16035 | 14293 | 8874 | 13037 | 16225 | 15183 |
| 8241 | 10110 | 13560 | 16627 | 14384 | 8898 | 13241 | 16279 | 15202 |
| 8373 | 10341 | 13726 | 17073 | 14408 | 9006 | 13309 | 18325 | 15263 |
| 8419 | 10386 | 13829 | 17097 | 15211 | 9616 | 14401 | 18852 | 15318 |
| 8489 | 10906 | 14635 | 17147 | 16452 | 9861 | 14838 |       | 15379 |
| 9080 | 10997 | 14674 | 17711 | 16595 | 9909 | 14941 |       | 15409 |

|       |       |       |       |       |       |       |       |
|-------|-------|-------|-------|-------|-------|-------|-------|
| 9249  | 11487 | 14783 | 18388 | 16617 | 10197 | 15834 | 15411 |
| 9365  | 11931 | 14871 | 18644 |       | 10399 | 15848 | 15601 |
| 9990  | 12692 | 14960 |       |       | 10738 | 16082 | 16163 |
| 10038 | 13354 | 15047 |       |       | 11140 | 16195 | 16251 |
| 10778 | 14009 | 15145 |       |       | 11467 | 16626 | 16387 |
| 11250 | 14324 | 15213 |       |       | 12174 | 18160 | 17238 |
| 11340 | 14552 | 15415 |       |       | 12190 | 18369 | 17835 |
| 11375 | 14913 | 15463 |       |       | 12197 |       | 18554 |
| 11491 | 14994 | 15541 |       |       | 12228 |       |       |
| 11646 | 15094 | 15703 |       |       | 12231 |       |       |
| 11737 | 15161 | 16660 |       |       | 13659 |       |       |
| 11880 | 15618 | 16693 |       |       | 13921 |       |       |
| 12091 | 15844 | 16907 |       |       | 14254 |       |       |
| 12606 | 15897 | 17356 |       |       | 14385 |       |       |
| 12701 | 15920 | 17898 |       |       | 14513 |       |       |
| 12702 | 15949 | 18026 |       |       | 14537 |       |       |
| 12920 | 16128 | 18072 |       |       | 14695 |       |       |
| 13242 | 16151 | 18497 |       |       | 14944 |       |       |
| 13458 | 16209 | 18960 |       |       | 15252 |       |       |
| 13625 | 16216 |       |       |       | 15302 |       |       |
| 13781 | 16269 |       |       |       | 15350 |       |       |
| 14139 | 16314 |       |       |       | 15382 |       |       |
| 14208 | 16327 |       |       |       | 15462 |       |       |
| 14337 | 16562 |       |       |       | 15533 |       |       |
| 14349 | 16630 |       |       |       | 15639 |       |       |
| 14354 | 16745 |       |       |       | 15730 |       |       |
| 14791 | 16925 |       |       |       | 16111 |       |       |
| 14875 | 17093 |       |       |       | 16146 |       |       |
| 15063 | 17256 |       |       |       | 16290 |       |       |
| 15166 | 17438 |       |       |       | 16416 |       |       |
| 15169 | 17647 |       |       |       | 16653 |       |       |
| 15216 | 17760 |       |       |       | 16682 |       |       |
| 15403 | 18305 |       |       |       | 16750 |       |       |
| 15701 | 18435 |       |       |       | 17330 |       |       |
| 16311 | 18466 |       |       |       | 17415 |       |       |
| 16337 | 18799 |       |       |       | 17533 |       |       |
| 16605 | 19073 |       |       |       | 17583 |       |       |
| 16659 | 19099 |       |       |       | 18791 |       |       |
| 16721 |       |       |       |       |       |       |       |
| 16798 |       |       |       |       |       |       |       |
| 17120 |       |       |       |       |       |       |       |
| 17473 |       |       |       |       |       |       |       |
| 17569 |       |       |       |       |       |       |       |
| 17570 |       |       |       |       |       |       |       |
| 17628 |       |       |       |       |       |       |       |
| 17794 |       |       |       |       |       |       |       |
| 17809 |       |       |       |       |       |       |       |
| 17868 |       |       |       |       |       |       |       |
| 17878 |       |       |       |       |       |       |       |
| 18643 |       |       |       |       |       |       |       |
| 18815 |       |       |       |       |       |       |       |
| 18824 |       |       |       |       |       |       |       |

|       |       |       |      |      |      |       |       |       |
|-------|-------|-------|------|------|------|-------|-------|-------|
| 160   | 94    | 320   | 422  | 640  | 381  | 327   | 291   | 653   |
| 160   | 94    | 320   | 422  | 640  | 381  | 327   | 291   | 653   |
| 394   | 262   | 396   | 464  | 1433 | 415  | 1204  | 616   | 1166  |
| 420   | 305   | 502   | 481  | 1717 | 1710 | 1605  | 771   | 1299  |
| 466   | 337   | 602   | 530  | 1756 | 1887 | 1780  | 908   | 1317  |
| 957   | 349   | 605   | 544  | 2425 | 1899 | 1916  | 1191  | 1427  |
| 1477  | 386   | 708   | 546  | 2485 | 1981 | 2188  | 1273  | 1449  |
| 2532  | 456   | 776   | 552  | 2890 | 2644 | 2420  | 1562  | 1452  |
| 3200  | 509   | 777   | 769  | 3030 | 2779 | 2575  | 1718  | 1637  |
| 4715  | 599   | 1099  | 1160 | 3627 | 3021 | 2765  | 1725  | 1947  |
| 6478  | 641   | 1182  | 1354 | 3674 | 3093 | 2992  | 2069  | 2068  |
| 8416  | 744   | 1690  | 1613 | 3766 | 3254 | 3201  | 2085  | 2111  |
| 8902  | 1079  | 2066  | 1743 | 3926 | 3613 | 3297  | 2236  | 2220  |
| 9096  | 1212  | 2114  | 2110 | 4180 | 3657 | 3510  | 2250  | 2385  |
| 9670  | 1275  | 2515  | 2162 | 4355 | 3787 | 3662  | 2354  | 2411  |
| 9688  | 1342  | 2687  | 2426 | 4481 | 3955 | 3669  | 2439  | 3367  |
| 9697  | 1641  | 2830  | 2602 | 4499 | 4006 | 3673  | 2953  | 3383  |
| 9784  | 1702  | 2949  | 2634 | 4688 | 4036 | 4230  | 3108  | 3407  |
| 9791  | 2229  | 3083  | 2858 | 4695 | 4412 | 4473  | 3136  | 3485  |
| 9878  | 2376  | 3270  | 2946 | 4766 | 4526 | 4474  | 3226  | 3497  |
| 9936  | 2621  | 3762  | 2982 | 5034 | 4564 | 4958  | 3370  | 3535  |
| 9962  | 2748  | 3949  | 3178 | 5054 | 4721 | 5070  | 3430  | 3634  |
| 9965  | 3212  | 3957  | 3729 | 5080 | 4842 | 5217  | 3469  | 3652  |
| 9993  | 3940  | 4193  | 3959 | 5154 | 4887 | 5526  | 3530  | 3654  |
| 10047 | 4540  | 4295  | 4022 | 5163 | 5015 | 6093  | 3587  | 3690  |
| 10163 | 4559  | 4452  | 4066 | 5218 | 5105 | 6369  | 3636  | 3701  |
| 10334 | 4812  | 5079  | 4072 | 5356 | 5212 | 6448  | 3637  | 3898  |
| 10430 | 5613  | 5301  | 4214 | 5379 | 5450 | 6736  | 3784  | 4480  |
| 10483 | 6020  | 5372  | 4338 | 5496 | 5630 | 6790  | 3897  | 4670  |
| 10553 | 6425  | 5512  | 4385 | 5604 | 5718 | 6929  | 3952  | 4760  |
| 10777 | 6943  | 5727  | 4520 | 5635 | 5723 | 7645  | 4395  | 4902  |
| 10808 | 7580  | 5981  | 4848 | 5671 | 5872 | 7672  | 5017  | 4908  |
| 10890 | 9632  | 6226  | 4893 | 6192 | 5989 | 8116  | 5339  | 5336  |
| 11033 | 9874  | 6571  | 4917 | 6210 | 6086 | 8188  | 5606  | 5539  |
| 11475 | 10136 | 6596  | 4947 | 6244 | 6224 | 8394  | 5978  | 6099  |
| 11714 | 10155 | 7196  | 4980 | 6484 | 6512 | 8464  | 6279  | 6238  |
| 11757 | 10267 | 7276  | 5056 | 6533 | 6603 | 8527  | 6291  | 6275  |
| 11795 | 10299 | 7314  | 5074 | 6552 | 6740 | 8980  | 6561  | 7221  |
| 11806 | 10447 | 7545  | 5184 | 7003 | 6756 | 8983  | 6856  | 7931  |
| 11894 | 10454 | 7975  | 5196 | 7029 | 6801 | 8994  | 7060  | 8679  |
| 11952 | 10539 | 8238  | 5322 | 7259 | 7102 | 9140  | 8368  | 8835  |
| 11957 | 10546 | 8554  | 5443 | 7362 | 7131 | 9262  | 8420  | 8889  |
| 12274 | 10547 | 9347  | 5664 | 7378 | 7167 | 9278  | 9219  | 9020  |
| 12861 | 10608 | 9713  | 5693 | 7504 | 7248 | 9702  | 9254  | 9052  |
| 12862 | 10637 | 9790  | 5822 | 7543 | 7302 | 9707  | 9516  | 9131  |
| 12901 | 10660 | 9833  | 6003 | 7793 | 7595 | 9782  | 9675  | 9366  |
| 12954 | 10724 | 9896  | 6132 | 7885 | 7597 | 9892  | 9694  | 10034 |
| 12966 | 10755 | 10296 | 6298 | 8021 | 7782 | 10009 | 9724  | 10603 |
| 13153 | 10979 | 10574 | 6436 | 8105 | 7829 | 10235 | 9886  | 10984 |
| 13221 | 11020 | 10585 | 6481 | 8775 | 8113 | 10260 | 9969  | 11101 |
| 13329 | 11029 | 10606 | 6712 | 8787 | 8187 | 10423 | 10240 | 11137 |
| 13387 | 11257 | 10715 | 6798 | 9287 | 8354 | 10690 | 10376 | 11252 |

|       |       |       |       |       |       |       |       |       |
|-------|-------|-------|-------|-------|-------|-------|-------|-------|
| 13399 | 11350 | 10793 | 6830  | 9304  | 8367  | 10692 | 10388 | 11309 |
| 13419 | 11730 | 10816 | 7040  | 9770  | 8380  | 10746 | 10400 | 11458 |
| 13478 | 11735 | 10846 | 7412  | 9986  | 8583  | 11059 | 10636 | 11524 |
| 13505 | 11742 | 10868 | 7661  | 10024 | 8777  | 11240 | 10781 | 11811 |
| 13512 | 11783 | 10917 | 7721  | 10108 | 9949  | 11456 | 11014 | 12840 |
| 13562 | 11852 | 11012 | 8009  | 10117 | 10165 | 11706 | 11244 | 13096 |
| 13571 | 11959 | 11016 | 8233  | 10198 | 10231 | 11724 | 11298 | 13158 |
| 14425 | 11998 | 11129 | 8334  | 10226 | 10315 | 11818 | 11397 | 13237 |
| 14485 | 12041 | 11147 | 8543  | 10728 | 10549 | 11832 | 11678 | 13381 |
| 14567 | 12093 | 11183 | 8925  | 10945 | 10639 | 11853 | 11828 | 13435 |
| 14594 | 12224 | 11597 | 9660  | 10993 | 10758 | 11980 | 11889 | 13610 |
| 14683 | 12373 | 11762 | 9662  | 11063 | 10865 | 11999 | 11994 | 13721 |
| 14714 | 12570 | 11784 | 9954  | 11197 | 11045 | 12011 | 12009 | 14675 |
| 14799 | 12637 | 11858 | 10140 | 11198 | 11134 | 12033 | 12050 | 14700 |
| 14831 | 13045 | 11978 | 10160 | 11435 | 11142 | 12112 | 12163 | 14864 |
| 14966 | 13451 | 12027 | 10271 | 11561 | 11152 | 12247 | 12573 | 14993 |
| 15033 | 13476 | 12035 | 10331 | 11583 | 11592 | 12270 | 12979 | 15225 |
| 15064 | 13589 | 12215 | 10444 | 11657 | 11709 | 12297 | 13164 | 15440 |
| 15174 | 13619 | 12372 | 10458 | 11688 | 12029 | 12591 | 13983 | 15461 |
| 15201 | 13680 | 12400 | 10588 | 11738 | 12081 | 12614 | 14007 | 15504 |
| 16068 | 14387 | 12537 | 10641 | 11971 | 12430 | 12794 | 14169 | 15559 |
| 16240 | 14453 | 12598 | 10666 | 11986 | 12635 | 13086 | 14333 | 15780 |
| 16266 | 14536 | 12648 | 10706 | 12045 | 12715 | 13483 | 14797 | 16127 |
| 16495 | 14551 | 12684 | 10742 | 12065 | 13293 | 14117 | 14832 | 16169 |
| 16734 | 14570 | 13224 | 10786 | 12140 | 13431 | 14459 | 14976 | 16255 |
| 17926 | 14773 | 13295 | 10859 | 12307 | 13576 | 14694 | 15073 | 16342 |
| 18013 | 14859 | 13461 | 10880 | 12371 | 14290 | 15007 | 15221 | 16832 |
| 18335 | 14861 | 13687 | 10967 | 12638 | 14309 | 16074 | 15386 | 17023 |
|       | 14889 | 13839 | 10976 | 12921 | 14336 | 17258 | 15490 | 17027 |
|       | 15000 | 13889 | 11064 | 13503 | 14373 | 17379 | 15584 | 17059 |
|       | 15004 | 13957 | 11094 | 13681 | 14397 | 18365 | 15720 | 17680 |
|       | 15034 | 14151 | 11196 | 14124 | 14929 | 18439 | 16572 | 17998 |
|       | 15113 | 14176 | 11381 | 14198 | 15045 | 18514 | 16634 | 18094 |
|       | 15141 | 14228 | 11389 | 14466 | 15124 | 18582 | 16673 | 18496 |
|       | 16183 | 14265 | 11403 | 14820 | 15313 | 18583 | 16753 | 18840 |
|       | 16498 | 14460 | 11521 | 15008 | 15494 | 19152 | 16929 | 18898 |
|       | 16527 | 14656 | 11555 | 15235 | 15634 |       | 17061 | 19010 |
|       | 16649 | 14803 | 11610 | 15807 | 16404 |       | 17494 | 19042 |
|       | 17386 | 14808 | 11680 | 15826 | 16620 |       | 17952 |       |
|       | 17466 | 14890 | 11741 | 15886 | 17072 |       | 18315 |       |
|       | 17980 | 14995 | 12063 | 15943 | 17184 |       | 18713 |       |
|       | 18064 | 15037 | 12302 | 16307 | 17348 |       | 19174 |       |
|       | 18065 | 15172 | 12438 | 17458 | 17368 |       |       |       |
|       | 18310 | 15203 | 12445 | 17972 | 17629 |       |       |       |
|       | 18882 | 15315 | 12468 | 18169 | 17859 |       |       |       |
|       | 19039 | 15423 | 12538 | 18218 | 17981 |       |       |       |
|       | 19064 | 16264 | 12542 | 18481 | 18602 |       |       |       |
|       |       | 16309 | 12649 | 18574 | 18937 |       |       |       |
|       |       | 16435 | 12679 | 18743 | 18976 |       |       |       |
|       |       | 16535 | 12687 | 18862 | 19091 |       |       |       |
|       |       | 16705 | 12743 | 18866 | 19162 |       |       |       |
|       |       | 16814 | 12830 | 18935 |       |       |       |       |

|       |       |       |
|-------|-------|-------|
| 17488 | 13572 | 19075 |
| 17964 | 13650 |       |
| 18328 | 14210 |       |
| 19001 | 14284 |       |
|       | 14417 |       |
|       | 14692 |       |
|       | 14880 |       |
|       | 15036 |       |
|       | 15465 |       |
|       | 15565 |       |
|       | 15694 |       |
|       | 15884 |       |
|       | 15935 |       |
|       | 16103 |       |
|       | 16184 |       |
|       | 16675 |       |
|       | 16738 |       |
|       | 16956 |       |
|       | 17209 |       |
|       | 17215 |       |
|       | 17245 |       |
|       | 18113 |       |
|       | 18191 |       |
|       | 18379 |       |
|       | 18578 |       |
|       | 18588 |       |
|       | 18731 |       |
|       | 18734 |       |
|       | 18836 |       |
|       | 19003 |       |



|       |       |       |       |       |       |       |       |       |
|-------|-------|-------|-------|-------|-------|-------|-------|-------|
| 766   | 446   | 91    | 1683  | 1773  | 3097  | 4367  | 126   | 6     |
| 766   | 446   | 91    | 1683  | 1773  | 3097  | 4367  | 126   | 6     |
| 1067  | 1852  | 300   | 1992  | 1855  | 4093  | 4639  | 141   | 76    |
| 1432  | 2233  | 664   | 2241  | 1866  | 4419  | 5071  | 177   | 111   |
| 1636  | 2417  | 728   | 2871  | 1953  | 5088  | 5431  | 179   | 113   |
| 1751  | 2742  | 1738  | 3190  | 2412  | 5107  | 5482  | 248   | 123   |
| 1890  | 3287  | 1976  | 3404  | 3160  | 5485  | 5749  | 340   | 397   |
| 2285  | 3576  | 2054  | 3428  | 3386  | 5868  | 5907  | 405   | 718   |
| 2288  | 3752  | 2406  | 3907  | 3410  | 6282  | 6127  | 435   | 924   |
| 2522  | 4002  | 2508  | 4110  | 3641  | 6634  | 6266  | 454   | 980   |
| 2839  | 4082  | 2635  | 4692  | 4319  | 6672  | 6789  | 721   | 1138  |
| 3330  | 4910  | 2650  | 4799  | 4478  | 6705  | 7254  | 817   | 1199  |
| 3358  | 4953  | 2817  | 5083  | 4668  | 6760  | 7464  | 905   | 1221  |
| 4039  | 5759  | 2926  | 5510  | 4773  | 7328  | 7563  | 911   | 1230  |
| 4106  | 5952  | 3414  | 5607  | 5111  | 7427  | 7693  | 1019  | 1255  |
| 4289  | 6274  | 3451  | 5784  | 5136  | 7515  | 7934  | 1077  | 1325  |
| 4572  | 7054  | 3548  | 5848  | 5224  | 7634  | 7959  | 1080  | 1505  |
| 4965  | 7168  | 3592  | 6071  | 5629  | 8843  | 8147  | 1106  | 1548  |
| 5158  | 7395  | 3783  | 6667  | 6310  | 8884  | 8209  | 1114  | 1729  |
| 7047  | 7476  | 3859  | 6708  | 6384  | 8962  | 9025  | 1130  | 1797  |
| 7164  | 8037  | 3912  | 6877  | 6615  | 9510  | 9773  | 1136  | 2212  |
| 7346  | 8292  | 3918  | 6923  | 6692  | 10627 | 10626 | 1154  | 2438  |
| 7523  | 8816  | 3923  | 7162  | 7333  | 11554 | 11649 | 1163  | 2545  |
| 7689  | 8927  | 4046  | 7185  | 7542  | 12204 | 12293 | 1168  | 2626  |
| 8208  | 9142  | 4398  | 7365  | 7639  | 12377 | 12856 | 1192  | 2808  |
| 8753  | 10067 | 4630  | 7606  | 7699  | 15500 | 13186 | 1201  | 2876  |
| 8937  | 10283 | 4821  | 8028  | 7716  | 16038 | 13769 | 1205  | 3804  |
| 9551  | 11673 | 5317  | 8078  | 7764  | 16639 | 13916 | 1345  | 4767  |
| 9860  | 11906 | 5405  | 8181  | 8042  |       | 13981 | 2544  | 4849  |
| 10111 | 11966 | 6458  | 8439  | 8060  |       | 14017 | 2920  | 5210  |
| 10663 | 12008 | 6751  | 8959  | 8084  |       | 14216 | 2950  | 5871  |
| 10882 | 13251 | 8660  | 9801  | 8110  |       | 14273 | 3098  | 7032  |
| 11526 | 13885 | 9031  | 9818  | 8466  |       | 14321 | 3204  | 7510  |
| 11530 | 14296 | 9452  | 9884  | 8648  |       | 14846 | 4031  | 7622  |
| 11643 | 14356 | 9922  | 9893  | 8842  |       | 15400 | 4160  | 9606  |
| 11875 | 14581 | 10229 | 10000 | 8896  |       | 15582 | 6838  | 9646  |
| 11911 | 14792 | 11468 | 11290 | 8961  |       | 15713 | 8096  | 9734  |
| 11918 | 16009 | 11498 | 11354 | 9568  |       | 15855 | 8097  | 9763  |
| 12032 | 16288 | 11676 | 11391 | 10322 |       | 15931 | 8201  | 10170 |
| 12489 | 17712 | 11723 | 11557 | 10401 |       | 16069 | 8632  | 10182 |
| 12547 | 18204 | 11872 | 12021 | 10680 |       | 16121 | 9106  | 10286 |
| 12691 |       | 12603 | 12286 | 10737 |       | 16141 | 9669  | 10457 |
| 13014 |       | 12792 | 12719 | 11546 |       | 16171 | 9674  | 10463 |
| 13421 |       | 12903 | 13308 | 12256 |       | 16347 | 9747  | 10700 |
| 13999 |       | 12947 | 13658 | 12289 |       | 16512 | 9751  | 10722 |
| 14590 |       | 13379 | 14566 | 12320 |       | 16685 | 9765  | 10727 |
| 14902 |       | 13590 | 14574 | 13015 |       | 16853 | 9879  | 10783 |
| 14930 |       | 14005 | 14920 | 13094 |       | 17053 | 9902  | 11128 |
| 15030 |       | 14699 | 15222 | 13189 |       | 17056 | 10072 | 11494 |
| 15193 |       | 14723 | 15649 | 13212 |       | 17703 | 10084 | 11695 |
| 15300 |       | 14919 | 16010 | 13283 |       | 17864 | 10097 | 11748 |
| 15360 |       | 14998 | 16058 | 13452 |       | 18085 | 10227 | 11749 |

|       |       |       |       |       |       |       |
|-------|-------|-------|-------|-------|-------|-------|
| 15790 | 15404 | 16650 | 13642 | 18587 | 10246 | 11772 |
| 16079 | 15727 | 16694 | 13700 | 18647 | 10335 | 11857 |
| 16173 | 15808 | 16797 | 15852 |       | 10357 | 11905 |
| 16220 | 16315 | 17444 | 16829 |       | 10366 | 12924 |
| 16412 | 16374 | 18299 |       |       | 10456 | 13177 |
| 16447 | 16508 | 18536 |       |       | 10494 | 13290 |
| 16727 | 17731 |       |       |       | 10519 | 13456 |
| 17085 | 18324 |       |       |       | 10609 | 13515 |
| 17392 | 18411 |       |       |       | 10668 | 14362 |
| 18070 | 18585 |       |       |       | 10673 | 14480 |
| 18562 | 18924 |       |       |       | 11000 | 14514 |
| 18801 |       |       |       |       | 11008 | 14752 |
|       |       |       |       |       | 11255 | 14893 |
|       |       |       |       |       | 11256 | 15054 |
|       |       |       |       |       | 11377 | 15086 |
|       |       |       |       |       | 11519 | 15520 |
|       |       |       |       |       | 11520 | 15545 |
|       |       |       |       |       | 11609 | 16384 |
|       |       |       |       |       | 11625 | 16564 |
|       |       |       |       |       | 11642 | 17945 |
|       |       |       |       |       | 11691 | 18001 |
|       |       |       |       |       | 11705 | 18081 |
|       |       |       |       |       | 11715 | 18106 |
|       |       |       |       |       | 11776 | 18125 |
|       |       |       |       |       | 11780 | 18854 |
|       |       |       |       |       | 11807 |       |
|       |       |       |       |       | 11864 |       |
|       |       |       |       |       | 11886 |       |
|       |       |       |       |       | 12342 |       |
|       |       |       |       |       | 12500 |       |
|       |       |       |       |       | 13243 |       |
|       |       |       |       |       | 13248 |       |
|       |       |       |       |       | 13249 |       |
|       |       |       |       |       | 13386 |       |
|       |       |       |       |       | 13453 |       |
|       |       |       |       |       | 13473 |       |
|       |       |       |       |       | 13567 |       |
|       |       |       |       |       | 13570 |       |
|       |       |       |       |       | 13813 |       |
|       |       |       |       |       | 14579 |       |
|       |       |       |       |       | 14655 |       |
|       |       |       |       |       | 14660 |       |
|       |       |       |       |       | 14716 |       |
|       |       |       |       |       | 14740 |       |
|       |       |       |       |       | 14741 |       |
|       |       |       |       |       | 14798 |       |
|       |       |       |       |       | 14833 |       |
|       |       |       |       |       | 14884 |       |
|       |       |       |       |       | 14942 |       |
|       |       |       |       |       | 14973 |       |
|       |       |       |       |       | 14997 |       |
|       |       |       |       |       | 15084 |       |

15121  
15228  
16118  
16191  
16294  
16352  
16410  
16439  
16466  
16526  
16532  
16550  
16552  
16560  
16607  
16667  
16671  
16697  
16698  
16701  
16702  
16725  
16726  
16752  
16784  
17462  
17750  
17806  
17904  
17930  
18078  
18132  
18133  
18146  
18175  
18182  
18183  
18230  
18251  
18259  
18276  
18277  
18302  
18312  
18326  
18334  
18336  
18370  
18870

|      |      |       |      |      |       |       |       |       |
|------|------|-------|------|------|-------|-------|-------|-------|
| 186  | 85   | 220   | 86   | 301  | 471   | 565   | 278   | 55    |
| 186  | 85   | 220   | 86   | 301  | 471   | 565   | 278   | 55    |
| 187  | 95   | 326   | 325  | 1801 | 857   | 587   | 576   | 328   |
| 306  | 231  | 339   | 378  | 1927 | 1228  | 681   | 1215  | 558   |
| 374  | 247  | 1165  | 1211 | 2022 | 1423  | 1167  | 2280  | 704   |
| 458  | 332  | 1195  | 1324 | 2109 | 1943  | 1169  | 2369  | 730   |
| 610  | 366  | 1417  | 1390 | 2131 | 2156  | 1268  | 2557  | 749   |
| 682  | 470  | 1604  | 1572 | 2279 | 2252  | 1472  | 2712  | 1243  |
| 1156 | 746  | 1663  | 1760 | 2407 | 2615  | 1486  | 2980  | 1575  |
| 1176 | 974  | 1830  | 1781 | 2706 | 2726  | 1523  | 3095  | 1786  |
| 1219 | 1006 | 2044  | 1893 | 2818 | 3000  | 1897  | 3252  | 1945  |
| 1307 | 1444 | 2267  | 2009 | 2846 | 3135  | 2224  | 3306  | 2005  |
| 1489 | 1503 | 2269  | 2028 | 2928 | 3227  | 2502  | 3314  | 2056  |
| 1648 | 1640 | 2435  | 2149 | 3078 | 3343  | 2622  | 3543  | 2098  |
| 1877 | 1908 | 2509  | 2769 | 3134 | 3394  | 2788  | 3694  | 2440  |
| 2012 | 1938 | 2516  | 2832 | 3250 | 3522  | 3014  | 4993  | 2553  |
| 2139 | 2023 | 2761  | 2838 | 3281 | 3984  | 3321  | 5162  | 2554  |
| 2227 | 2062 | 3304  | 3035 | 3375 | 4069  | 3335  | 6300  | 2595  |
| 2371 | 2200 | 3844  | 3239 | 3411 | 4084  | 3396  | 6386  | 3316  |
| 2372 | 2319 | 4019  | 3243 | 3473 | 4205  | 3403  | 6402  | 3319  |
| 2404 | 2731 | 4053  | 3377 | 3567 | 4218  | 3405  | 6934  | 3608  |
| 2415 | 2777 | 4141  | 3399 | 3745 | 4369  | 3423  | 7182  | 3904  |
| 2454 | 2861 | 4349  | 3591 | 3814 | 5014  | 3603  | 7630  | 3960  |
| 2456 | 2921 | 4394  | 3625 | 3821 | 5040  | 3663  | 7808  | 3983  |
| 2734 | 3279 | 4487  | 3660 | 3874 | 5393  | 3664  | 8036  | 4181  |
| 2762 | 3707 | 4877  | 3699 | 3993 | 5464  | 3991  | 8217  | 4853  |
| 2795 | 3738 | 4891  | 3705 | 4399 | 6107  | 4254  | 8298  | 5094  |
| 2969 | 3945 | 4978  | 3750 | 5177 | 6490  | 4588  | 9055  | 6254  |
| 3010 | 4013 | 5062  | 4025 | 5247 | 7127  | 4726  | 9741  | 6701  |
| 3067 | 4045 | 5092  | 4056 | 5993 | 8111  | 4909  | 9758  | 6957  |
| 3148 | 4219 | 5153  | 4222 | 6292 | 8157  | 5697  | 9762  | 7554  |
| 3208 | 4320 | 5190  | 4256 | 6316 | 8303  | 5864  | 9768  | 7798  |
| 3508 | 4441 | 5203  | 4600 | 6461 | 8870  | 5870  | 9821  | 7861  |
| 3846 | 4535 | 5331  | 4854 | 6497 | 8940  | 6641  | 9856  | 7977  |
| 3930 | 4824 | 5467  | 4885 | 6505 | 9610  | 6764  | 9976  | 8312  |
| 4078 | 4841 | 5638  | 5003 | 6558 | 9621  | 6861  | 10014 | 8468  |
| 4189 | 5146 | 5669  | 5065 | 6581 | 9825  | 6865  | 10138 | 8515  |
| 4248 | 5238 | 6104  | 5129 | 6662 | 9865  | 7414  | 10310 | 8950  |
| 4469 | 5448 | 6215  | 5135 | 6808 | 10254 | 7810  | 10343 | 9478  |
| 4753 | 5594 | 6405  | 5185 | 7034 | 10621 | 8436  | 10373 | 9519  |
| 5013 | 5645 | 6469  | 5330 | 7130 | 10910 | 8873  | 10429 | 9578  |
| 5543 | 5773 | 6750  | 5340 | 7166 | 10969 | 9583  | 10763 | 9806  |
| 5584 | 5785 | 6795  | 5359 | 7199 | 11586 | 9719  | 10791 | 10595 |
| 5711 | 6277 | 7068  | 5430 | 7288 | 11667 | 9733  | 11061 | 11022 |
| 6155 | 6438 | 7581  | 5646 | 7311 | 11698 | 10125 | 11185 | 11281 |
| 6475 | 7738 | 7809  | 5650 | 7399 | 11822 | 10181 | 11213 | 11422 |
| 6618 | 8469 | 8130  | 5811 | 7573 | 12058 | 10236 | 11215 | 11473 |
| 8038 | 8535 | 8158  | 5956 | 7918 | 12086 | 10314 | 11237 | 11500 |
| 8764 | 8944 | 8422  | 6106 | 8173 | 12173 | 10332 | 11335 | 11509 |
| 9642 | 9332 | 10054 | 6290 | 8325 | 12226 | 10420 | 11368 | 11515 |
| 9659 | 9627 | 10059 | 6506 | 8471 | 12349 | 10513 | 11415 | 11585 |
| 9780 | 9667 | 10195 | 6535 | 8836 | 12567 | 10522 | 11425 | 11805 |

|       |       |       |       |       |       |       |       |       |
|-------|-------|-------|-------|-------|-------|-------|-------|-------|
| 9846  | 9883  | 10202 | 6567  | 8897  | 12694 | 10796 | 11446 | 11987 |
| 9870  | 9899  | 10234 | 6635  | 8930  | 12708 | 11023 | 11565 | 11989 |
| 9914  | 9910  | 10346 | 6684  | 8945  | 13302 | 11041 | 11621 | 12089 |
| 9939  | 10002 | 10378 | 6796  | 9321  | 13320 | 11364 | 11645 | 12696 |
| 9957  | 10040 | 10575 | 6899  | 9828  | 13376 | 11413 | 11682 | 12768 |
| 10052 | 10162 | 10790 | 7468  | 10379 | 13604 | 11474 | 11855 | 12902 |
| 10185 | 10196 | 10810 | 7991  | 10674 | 13783 | 11482 | 11909 | 13055 |
| 10408 | 10288 | 10819 | 8118  | 10699 | 14263 | 11790 | 11935 | 13972 |
| 10432 | 10452 | 10957 | 8212  | 10904 | 14323 | 11816 | 11988 | 14409 |
| 10582 | 10507 | 10974 | 8253  | 11028 | 14420 | 11841 | 12068 | 14492 |
| 10601 | 10754 | 11193 | 8404  | 11351 | 14812 | 11992 | 12362 | 15227 |
| 10602 | 10886 | 11471 | 9585  | 11460 | 14834 | 11997 | 12605 | 15549 |
| 10605 | 10898 | 11687 | 9608  | 11668 | 14939 | 12024 | 12878 | 15617 |
| 10771 | 10951 | 11788 | 9620  | 11848 | 15019 | 12837 | 13039 | 16166 |
| 10829 | 10961 | 11938 | 9708  | 13640 | 15148 | 13129 | 13316 | 16313 |
| 10852 | 10999 | 12005 | 9968  | 13940 | 15214 | 13150 | 13422 | 16423 |
| 10853 | 11049 | 12092 | 10405 | 13947 | 15680 | 13176 | 13937 | 17767 |
| 10881 | 11055 | 12318 | 10482 | 14148 | 15714 | 13211 | 14064 | 17842 |
| 10889 | 11068 | 12549 | 10625 | 14179 | 15782 | 13244 | 14317 | 17938 |
| 10943 | 11085 | 12589 | 10795 | 14400 | 15867 | 13322 | 15646 | 18049 |
| 10959 | 11113 | 13534 | 10941 | 14413 | 15923 | 13463 | 15831 |       |
| 11076 | 11191 | 13690 | 11086 | 14434 | 16055 | 13485 | 16363 |       |
| 11106 | 11913 | 13899 | 11111 | 14922 | 16199 | 13608 | 17282 |       |
| 11192 | 11945 | 14307 | 11195 | 15150 | 16259 | 14043 | 17472 |       |
| 11261 | 12031 | 15200 | 11218 | 15217 | 16469 | 14215 | 17734 |       |
| 11328 | 12056 | 15229 | 11637 | 15234 | 16492 | 14493 | 18233 |       |
| 11789 | 12062 | 15230 | 11701 | 15297 | 16574 | 14698 | 18286 |       |
| 11800 | 12141 | 15579 | 11874 | 15740 | 16837 | 14836 | 18522 |       |
| 11887 | 12323 | 15741 | 11958 | 15922 | 17015 | 15050 |       |       |
| 11967 | 12508 | 15805 | 12159 | 16078 | 17355 | 15153 |       |       |
| 12059 | 12647 | 15904 | 12345 | 16274 | 17589 | 15182 |       |       |
| 12496 | 12660 | 15951 | 12433 | 16346 | 17690 | 15692 |       |       |
| 12659 | 12664 | 16714 | 13326 | 16661 | 18874 | 15700 |       |       |
| 12667 | 12811 | 17812 | 13356 | 17043 | 18919 | 15810 |       |       |
| 12726 | 12865 | 17947 | 13442 | 17631 | 18980 | 16190 |       |       |
| 12806 | 13161 | 18140 | 13591 | 17969 |       | 16568 |       |       |
| 13179 | 13448 | 18164 | 13752 | 18292 |       | 16575 |       |       |
| 13449 | 13535 | 18508 | 13802 | 18614 |       | 16623 |       |       |
| 13513 | 13592 | 19070 | 14099 | 19106 |       | 16866 |       |       |
| 13693 | 13986 | 19159 | 14320 | 19176 |       | 16902 |       |       |
| 14001 | 14021 | 19175 | 14355 |       |       | 17123 |       |       |
| 14094 | 14194 |       | 14634 |       |       | 17343 |       |       |
| 14508 | 14292 |       | 14782 |       |       | 17374 |       |       |
| 14658 | 14631 |       | 14849 |       |       | 17974 |       |       |
| 14952 | 14636 |       | 14888 |       |       | 18901 |       |       |
| 15176 | 14696 |       | 15746 |       |       | 18925 |       |       |
| 15237 | 14826 |       | 15833 |       |       |       |       |       |
| 15257 | 14862 |       | 16117 |       |       |       |       |       |
| 15893 | 14932 |       | 16201 |       |       |       |       |       |
| 16054 | 15027 |       | 16211 |       |       |       |       |       |
| 16324 | 15418 |       | 16375 |       |       |       |       |       |
| 16588 | 15847 |       | 16401 |       |       |       |       |       |

|       |       |       |
|-------|-------|-------|
| 16622 | 15885 | 16774 |
| 16759 | 15936 | 17163 |
| 17096 | 16050 | 17176 |
| 17874 | 16122 | 17331 |
| 18032 | 16339 | 17346 |
| 18059 | 16538 | 17360 |
| 18196 | 16591 | 17650 |
| 18257 | 17031 | 17682 |
| 18280 | 17393 | 17780 |
| 18751 | 18212 | 18184 |
| 18906 | 18221 | 18468 |
| 18986 | 18238 | 18594 |
|       | 18266 | 18613 |
|       | 18269 | 18625 |
|       | 18470 | 18641 |
|       | 18934 | 18730 |
|       | 19018 | 18872 |
|       | 19139 | 18891 |
|       |       | 18927 |
|       |       | 18987 |
|       |       | 19017 |
|       |       | 19074 |

|      |       |       |       |      |      |      |      |      |
|------|-------|-------|-------|------|------|------|------|------|
| 233  | 175   | 642   | 1442  | 213  | 79   | 83   | 15   | 107  |
| 233  | 175   | 642   | 1442  | 213  | 79   | 83   | 15   | 107  |
| 510  | 711   | 1540  | 2242  | 1658 | 103  | 105  | 45   | 276  |
| 637  | 1714  | 1657  | 2258  | 1661 | 124  | 106  | 114  | 334  |
| 652  | 1803  | 1664  | 2331  | 2492 | 194  | 135  | 120  | 401  |
| 685  | 1869  | 1715  | 3126  | 2672 | 200  | 148  | 136  | 976  |
| 1218 | 2047  | 1997  | 3493  | 2756 | 370  | 154  | 138  | 1062 |
| 1364 | 2251  | 2608  | 3909  | 2898 | 376  | 166  | 163  | 1096 |
| 1499 | 2352  | 2673  | 4142  | 3102 | 408  | 225  | 196  | 1236 |
| 1513 | 2702  | 3129  | 4516  | 3285 | 455  | 283  | 294  | 1238 |
| 1582 | 2708  | 3174  | 4992  | 3387 | 484  | 318  | 298  | 1239 |
| 1616 | 3340  | 3317  | 5081  | 3639 | 487  | 335  | 312  | 1297 |
| 1662 | 3495  | 3364  | 5199  | 4184 | 581  | 532  | 333  | 1301 |
| 1954 | 3748  | 3427  | 5345  | 4604 | 608  | 804  | 352  | 1387 |
| 1964 | 3799  | 3491  | 5483  | 4676 | 758  | 815  | 403  | 1448 |
| 1980 | 4231  | 3564  | 5572  | 5137 | 932  | 858  | 404  | 1465 |
| 1994 | 4551  | 3661  | 6360  | 5522 | 960  | 870  | 410  | 1716 |
| 2075 | 4966  | 3765  | 6489  | 5548 | 962  | 909  | 498  | 2027 |
| 2408 | 6713  | 3954  | 6699  | 5623 | 988  | 968  | 601  | 2048 |
| 2493 | 6719  | 4465  | 6753  | 5800 | 1004 | 972  | 614  | 2174 |
| 2498 | 6765  | 4527  | 6863  | 5845 | 1023 | 1076 | 702  | 2265 |
| 2524 | 7165  | 4659  | 6909  | 5922 | 1028 | 1084 | 867  | 2315 |
| 2567 | 7191  | 4907  | 7434  | 6276 | 1029 | 1093 | 913  | 2540 |
| 2668 | 8073  | 5082  | 8239  | 6332 | 1030 | 1110 | 1000 | 2652 |
| 2872 | 8371  | 5390  | 8614  | 6523 | 1057 | 1119 | 1092 | 2758 |
| 3150 | 8696  | 5608  | 9012  | 6550 | 1058 | 1120 | 1125 | 2796 |
| 3256 | 8699  | 6046  | 9216  | 6666 | 1075 | 1164 | 1131 | 2863 |
| 3262 | 8879  | 6270  | 9342  | 6755 | 1081 | 1171 | 1141 | 3091 |
| 3501 | 9389  | 6673  | 11384 | 6779 | 1082 | 1181 | 1155 | 3232 |
| 4050 | 9458  | 6817  | 12085 | 6803 | 1101 | 1198 | 1174 | 3272 |
| 4077 | 9541  | 6843  | 12258 | 6904 | 1113 | 1208 | 1185 | 3802 |
| 4138 | 9673  | 6907  | 13024 | 7009 | 1139 | 1229 | 1240 | 3902 |
| 4202 | 9842  | 7323  | 13072 | 7093 | 1175 | 1242 | 1296 | 3946 |
| 4392 | 9872  | 7349  | 13092 | 7295 | 1254 | 1320 | 1300 | 3982 |
| 4729 | 10320 | 7589  | 13228 | 7334 | 1258 | 1332 | 1313 | 4076 |
| 4977 | 10675 | 7814  | 13795 | 7457 | 1270 | 1379 | 1326 | 4536 |
| 5033 | 11138 | 7957  | 14223 | 7812 | 1274 | 1480 | 1337 | 4568 |
| 5091 | 11842 | 8297  | 14785 | 7862 | 1284 | 2458 | 1349 | 4847 |
| 5348 | 12157 | 8330  | 15142 | 7891 | 1380 | 2494 | 1353 | 4855 |
| 5640 | 12533 | 8391  | 15188 | 7895 | 1821 | 2586 | 1408 | 4883 |
| 6419 | 12870 | 8397  | 15210 | 7903 | 2462 | 2646 | 1413 | 4914 |
| 6420 | 12976 | 8473  | 15675 | 8059 | 2593 | 2684 | 1436 | 4927 |
| 6691 | 13115 | 8520  | 15921 | 8133 | 2714 | 3157 | 1473 | 5179 |
| 6707 | 13188 | 8568  | 17339 | 8146 | 2717 | 3242 | 1526 | 5373 |
| 7024 | 13883 | 9057  | 18475 | 8382 | 2719 | 3947 | 1535 | 5562 |
| 7387 | 15558 | 9208  | 18528 | 8433 | 2892 | 4074 | 1545 | 5599 |
| 8056 | 17132 | 9277  | 18561 | 8636 | 2917 | 4305 | 1629 | 6393 |
| 8234 | 17595 | 9346  |       | 8675 | 2943 | 5211 | 1631 | 7051 |
| 8263 |       | 9437  |       | 9021 | 3137 | 5767 | 1757 | 7149 |
| 8314 |       | 9890  |       | 9209 | 3153 | 7119 | 2324 | 7277 |
| 8316 |       | 10650 |       | 9368 | 3337 | 7982 | 2470 | 7278 |
| 8947 |       | 11441 |       | 9418 | 4730 | 8219 | 2473 | 7380 |

|       |       |       |       |       |       |       |
|-------|-------|-------|-------|-------|-------|-------|
| 8955  | 11760 | 9736  | 4857  | 9172  | 2570  | 7482  |
| 9122  | 11787 | 9836  | 5468  | 9188  | 2589  | 8328  |
| 9508  | 12277 | 10404 | 5469  | 9302  | 2716  | 8734  |
| 9517  | 12454 | 10580 | 5585  | 10042 | 3034  | 8763  |
| 9798  | 12960 | 12087 | 5699  | 10192 | 3179  | 8837  |
| 11388 | 13047 | 12917 | 5985  | 10309 | 3552  | 9693  |
| 11417 | 13113 | 13080 | 6033  | 10520 | 3597  | 9729  |
| 11452 | 13509 | 13152 | 6387  | 10750 | 3623  | 9841  |
| 12082 | 13922 | 13167 | 7042  | 10761 | 3646  | 9935  |
| 12300 | 14205 | 13443 | 7120  | 10877 | 3659  | 10109 |
| 12380 | 14512 | 13581 | 7243  | 10952 | 3956  | 10143 |
| 12698 | 14578 | 13855 | 7285  | 11307 | 3973  | 10178 |
| 12890 | 16084 | 14085 | 7310  | 11584 | 4592  | 10222 |
| 13013 | 16921 | 14350 | 7570  | 11603 | 4973  | 10232 |
| 13495 | 17289 | 14544 | 7571  | 11611 | 5696  | 10287 |
| 13551 | 17426 | 14818 | 7584  | 11727 | 5700  | 10289 |
| 13920 | 17710 | 15003 | 7769  | 11778 | 5726  | 10300 |
| 14905 | 17992 | 15179 | 8231  | 11814 | 6543  | 10374 |
| 15224 | 18504 | 15245 | 8329  | 11865 | 6606  | 10426 |
| 16648 | 18505 | 15385 | 8813  | 12604 | 6855  | 10503 |
| 16835 | 18680 | 15588 | 9171  | 13159 | 7025  | 10510 |
| 17050 |       | 16113 | 9644  | 13305 | 7230  | 10525 |
| 17543 |       | 16457 | 9664  | 13391 | 7368  | 10532 |
| 17718 |       | 17057 | 10338 | 13541 | 7441  | 10648 |
| 18282 |       | 17302 | 10436 | 13695 | 9116  | 10667 |
|       |       | 17455 | 10462 | 14012 | 9390  | 10766 |
|       |       | 17528 | 10478 | 14483 | 9663  | 10787 |
|       |       | 17604 | 10515 | 14715 | 9777  | 10850 |
|       |       | 17605 | 10581 | 14943 | 9940  | 10911 |
|       |       | 17635 | 10633 | 15112 | 9997  | 10982 |
|       |       | 17669 | 10803 | 15706 | 10148 | 11017 |
|       |       | 17761 | 10913 | 16159 | 10380 | 11050 |
|       |       | 18711 | 10942 | 16293 | 10443 | 11105 |
|       |       |       | 11039 | 16664 | 10451 | 11109 |
|       |       |       | 11120 | 16713 | 10516 | 11135 |
|       |       |       | 11285 | 17976 | 10589 | 11158 |
|       |       |       | 11299 | 18167 | 10932 | 11173 |
|       |       |       | 11382 |       | 11096 | 11230 |
|       |       |       | 11535 |       | 11116 | 11319 |
|       |       |       | 11604 |       | 11316 | 11466 |
|       |       |       | 11720 |       | 11330 | 11528 |
|       |       |       | 11779 |       | 11607 | 11608 |
|       |       |       | 11838 |       | 11652 | 11638 |
|       |       |       | 11895 |       | 11775 | 11697 |
|       |       |       | 12154 |       | 11794 | 11728 |
|       |       |       | 12503 |       | 12060 | 12117 |
|       |       |       | 12555 |       | 12061 | 12254 |
|       |       |       | 13130 |       | 12324 | 12346 |
|       |       |       | 13160 |       | 12328 | 12394 |
|       |       |       | 13219 |       | 12559 | 12414 |
|       |       |       | 13287 |       | 12675 | 12665 |
|       |       |       | 13330 |       | 13149 | 12710 |



|       |       |       |
|-------|-------|-------|
| 13383 | 13393 | 12745 |
| 13457 | 13629 | 13454 |
| 13480 | 14116 | 14123 |
| 13540 | 14119 | 14393 |
| 13670 | 14329 | 14779 |
| 14121 | 14653 | 14974 |
| 14391 | 14917 | 15013 |
| 14484 | 15001 | 15101 |
| 14545 | 15012 | 15181 |
| 14568 | 15098 | 15204 |
| 14604 | 16150 | 15349 |
| 14717 | 16247 | 15505 |
| 14768 | 16300 | 15631 |
| 14802 | 16355 | 15750 |
| 14866 | 16418 | 15862 |
| 14972 | 16496 | 16020 |
| 15005 | 16592 | 16112 |
| 15025 | 16598 | 16407 |
| 15028 | 16926 | 16606 |
| 15056 | 18098 | 16615 |
| 15087 | 18161 | 16678 |
| 15090 | 18178 | 16679 |
| 15091 | 18198 | 17216 |
| 15114 | 18214 | 18222 |
| 15233 | 18232 | 18526 |
| 16253 |       | 19060 |
| 16285 |       | 19156 |
| 16297 |       |       |
| 16328 |       |       |
| 16414 |       |       |
| 16525 |       |       |
| 16549 |       |       |
| 16579 |       |       |
| 16612 |       |       |
| 16665 |       |       |
| 16695 |       |       |
| 16696 |       |       |
| 16811 |       |       |
| 16985 |       |       |
| 17388 |       |       |
| 17447 |       |       |
| 17677 |       |       |
| 17723 |       |       |
| 17797 |       |       |
| 17800 |       |       |
| 17886 |       |       |
| 17924 |       |       |
| 17951 |       |       |
| 17975 |       |       |
| 17977 |       |       |
| 17997 |       |       |
| 18002 |       |       |

18033  
18052  
18055  
18079  
18097  
18104  
18124  
18127  
18131  
18171  
18177  
18199  
18200  
18241  
18252  
18254  
18275  
18303  
18351  
18707  
19044  
19076

| 275   | 400  | 90   | 228   | 266   | 240   | 277  | 238   | 60    |
|-------|------|------|-------|-------|-------|------|-------|-------|
| 275   | 400  | 90   | 228   | 266   | 240   | 277  | 238   | 60    |
| 663   | 607  | 119  | 354   | 673   | 330   | 387  | 615   | 224   |
| 1209  | 1210 | 1295 | 388   | 1439  | 345   | 411  | 1327  | 1346  |
| 1691  | 1328 | 1422 | 627   | 1772  | 393   | 450  | 1506  | 1416  |
| 1721  | 1492 | 1497 | 752   | 2040  | 585   | 453  | 1585  | 1872  |
| 1788  | 1733 | 1620 | 1054  | 2133  | 631   | 522  | 1606  | 2137  |
| 1796  | 1891 | 1774 | 1344  | 2246  | 1073  | 537  | 1847  | 2551  |
| 1914  | 2409 | 1777 | 1456  | 2527  | 1331  | 538  | 1857  | 2659  |
| 2011  | 2596 | 1913 | 1752  | 2578  | 1355  | 594  | 2015  | 2751  |
| 2168  | 2707 | 2030 | 1782  | 2874  | 1630  | 715  | 2322  | 2753  |
| 2190  | 3322 | 2084 | 1791  | 3276  | 1697  | 775  | 2666  | 3037  |
| 2328  | 3362 | 2446 | 1808  | 3523  | 1762  | 807  | 2679  | 3294  |
| 2379  | 3442 | 2538 | 2180  | 3740  | 1809  | 1382 | 2792  | 3308  |
| 2715  | 3825 | 2587 | 2821  | 4014  | 1931  | 1571 | 2930  | 3398  |
| 2907  | 3928 | 2609 | 2864  | 5032  | 2184  | 1603 | 3519  | 3457  |
| 2991  | 4057 | 3006 | 3223  | 5282  | 2307  | 1615 | 3832  | 3516  |
| 3283  | 4121 | 3036 | 3310  | 5577  | 2528  | 1655 | 4100  | 3605  |
| 3409  | 4133 | 3268 | 3323  | 6074  | 2993  | 1799 | 4545  | 3643  |
| 3459  | 4148 | 3339 | 3424  | 6472  | 3257  | 1820 | 4789  | 3967  |
| 3589  | 4226 | 3352 | 3502  | 6669  | 3594  | 1842 | 6453  | 4802  |
| 3628  | 4249 | 3511 | 3561  | 7566  | 4454  | 1918 | 6698  | 5377  |
| 3708  | 4353 | 3515 | 3753  | 8139  | 4482  | 1955 | 7200  | 5755  |
| 3873  | 4366 | 3635 | 3871  | 8577  | 5086  | 1971 | 7364  | 5849  |
| 3885  | 4498 | 3710 | 4135  | 8624  | 6991  | 2058 | 7528  | 6126  |
| 4155  | 4518 | 3901 | 4220  | 9920  | 7092  | 2100 | 7662  | 6501  |
| 4210  | 4645 | 3971 | 4956  | 10033 | 7335  | 2123 | 8124  | 6725  |
| 4246  | 4874 | 4041 | 5030  | 10152 | 7583  | 2186 | 8296  | 6729  |
| 4259  | 5010 | 4113 | 5031  | 10257 | 8305  | 2247 | 8313  | 6831  |
| 4334  | 5042 | 4129 | 5160  | 10481 | 8619  | 2254 | 8720  | 7374  |
| 4365  | 5045 | 4152 | 5363  | 10514 | 9487  | 2308 | 9054  | 7445  |
| 4556  | 5090 | 4206 | 6598  | 10623 | 9684  | 2530 | 9158  | 7483  |
| 4752  | 5173 | 4244 | 6601  | 11478 | 9725  | 2560 | 9165  | 7536  |
| 4837  | 5236 | 4310 | 6647  | 11495 | 9769  | 2654 | 9235  | 7577  |
| 4884  | 5589 | 4709 | 6873  | 11552 | 9772  | 2688 | 9537  | 7938  |
| 5120  | 5668 | 4894 | 7175  | 11722 | 9778  | 2787 | 9686  | 8222  |
| 5140  | 5895 | 5057 | 7792  | 11948 | 9859  | 2970 | 9830  | 8589  |
| 5240  | 5939 | 5102 | 7992  | 12096 | 10004 | 3043 | 10230 | 8731  |
| 5724  | 6479 | 5151 | 8683  | 12149 | 10167 | 3119 | 10349 | 8958  |
| 5957  | 6592 | 5367 | 9795  | 12329 | 10183 | 3124 | 10498 | 9138  |
| 6225  | 6600 | 5506 | 9942  | 12363 | 10193 | 3346 | 10643 | 9220  |
| 6233  | 6619 | 5656 | 10168 | 12432 | 10206 | 3477 | 10767 | 9491  |
| 6268  | 6775 | 5687 | 10175 | 12459 | 10258 | 3518 | 10823 | 9506  |
| 6493  | 6874 | 5735 | 10372 | 12562 | 10290 | 3593 | 11296 | 9513  |
| 6584  | 6885 | 6078 | 10418 | 12703 | 10409 | 3722 | 11349 | 9653  |
| 6767  | 6970 | 6195 | 10593 | 12872 | 10568 | 3767 | 11878 | 10416 |
| 7339  | 6975 | 6410 | 10642 | 13425 | 10590 | 3966 | 12171 | 10477 |
| 8454  | 7173 | 6500 | 10798 | 13804 | 10918 | 3974 | 12398 | 10538 |
| 8494  | 7312 | 6551 | 10884 | 13977 | 11031 | 4290 | 12478 | 11317 |
| 9419  | 7444 | 6620 | 10970 | 14144 | 11326 | 4297 | 12801 | 11461 |
| 9637  | 7564 | 6694 | 11027 | 14191 | 11445 | 4306 | 12936 | 12084 |
| 10023 | 7658 | 6768 | 11289 | 14266 | 11558 | 4687 | 13645 | 12172 |

|       |       |       |       |       |       |       |       |       |
|-------|-------|-------|-------|-------|-------|-------|-------|-------|
| 10121 | 8178  | 6905  | 11392 | 14314 | 11560 | 4780  | 13914 | 12178 |
| 10441 | 8204  | 7321  | 11571 | 14353 | 11577 | 4830  | 14577 | 12435 |
| 10598 | 8227  | 7448  | 11587 | 14622 | 11653 | 4831  | 14586 | 12607 |
| 10714 | 8431  | 7514  | 12057 | 15052 | 11669 | 5422  | 14589 | 12779 |
| 10740 | 8891  | 8002  | 12179 | 15139 | 11752 | 6421  | 14776 | 13333 |
| 10887 | 9650  | 8103  | 12290 | 15672 | 11934 | 6824  | 14800 | 13998 |
| 10907 | 10597 | 8185  | 12317 | 15762 | 12128 | 6986  | 15100 | 14386 |
| 10908 | 11144 | 8264  | 12337 | 15835 | 12364 | 7309  | 15980 | 14730 |
| 10936 | 11202 | 8301  | 12401 | 16158 | 12376 | 8586  | 16119 | 14736 |
| 11083 | 11264 | 8352  | 13641 | 16258 | 12644 | 9040  | 16256 | 14906 |
| 11115 | 11644 | 9201  | 13740 | 16326 | 12735 | 9056  | 16540 | 15081 |
| 11172 | 11666 | 9369  | 13859 | 16599 | 13116 | 9461  | 17802 | 15715 |
| 12010 | 11826 | 9651  | 13888 | 16838 | 13761 | 9654  | 17907 | 15732 |
| 12477 | 12143 | 10506 | 13948 | 17560 | 13814 | 9740  | 17914 | 17819 |
| 12495 | 12369 | 10508 | 14062 | 17845 | 13968 | 9952  | 18762 |       |
| 12520 | 12457 | 10743 | 14294 | 17921 | 15097 | 10071 |       |       |
| 12831 | 12458 | 10770 | 14416 | 18080 | 16350 | 10087 |       |       |
| 13341 | 12740 | 10830 | 14996 | 18981 | 16573 | 11013 |       |       |
| 13470 | 13002 | 11052 | 15147 |       | 16737 | 11092 |       |       |
| 13532 | 13351 | 11570 | 15321 |       | 16965 | 11259 |       |       |
| 13857 | 13482 | 11718 | 15521 |       | 17156 | 11283 |       |       |
| 13913 | 13502 | 11733 | 15537 |       | 18347 | 11333 |       |       |
| 14019 | 13803 | 11808 | 15581 |       | 18666 | 11507 |       |       |
| 14172 | 14059 | 12428 | 15636 |       | 18699 | 11936 |       |       |
| 14509 | 14259 | 12585 | 15678 |       |       | 11964 |       |       |
| 14562 | 14760 | 12625 | 15837 |       |       | 12164 |       |       |
| 14629 | 15129 | 13441 | 15953 |       |       | 12203 |       |       |
| 14857 | 15377 | 13487 | 16102 |       |       | 12271 |       |       |
| 15065 | 15557 | 13504 | 16317 |       |       | 12344 |       |       |
| 15067 | 16193 | 13745 | 16433 |       |       | 12359 |       |       |
| 15471 | 16262 | 13834 | 16463 |       |       | 12785 |       |       |
| 15779 | 16268 | 14033 | 16521 |       |       | 12973 |       |       |
| 16345 | 16320 | 14264 | 16719 |       |       | 13059 |       |       |
| 16362 | 16426 | 14285 | 16828 |       |       | 13236 |       |       |
| 16441 | 16815 | 14311 | 16850 |       |       | 13315 |       |       |
| 16583 | 17683 | 14440 | 17069 |       |       | 13852 |       |       |
| 16768 | 17841 | 14753 | 17610 |       |       | 14313 |       |       |
| 16769 | 18170 | 14757 | 18757 |       |       | 14491 |       |       |
| 16936 | 18272 | 14850 | 19062 |       |       | 14735 |       |       |
| 17091 | 18407 | 14935 | 19131 |       |       | 15061 |       |       |
| 17179 | 18883 | 15128 | 19140 |       |       | 15127 |       |       |
| 17301 | 18993 | 15162 |       |       |       | 15273 |       |       |
| 17507 | 19102 | 15185 |       |       |       | 15676 |       |       |
| 17986 | 19160 | 15241 |       |       |       | 15816 |       |       |
| 18045 |       | 15327 |       |       |       | 17716 |       |       |
| 18408 |       | 15331 |       |       |       | 17795 |       |       |
| 18642 |       | 15354 |       |       |       | 18114 |       |       |
| 18831 |       | 15436 |       |       |       | 18809 |       |       |
| 18899 |       | 15450 |       |       |       | 18900 |       |       |
| 18943 |       | 15528 |       |       |       | 18923 |       |       |
| 18983 |       | 15607 |       |       |       | 19077 |       |       |
| 19041 |       | 15645 |       |       |       |       |       |       |

15666  
15693  
15749  
15753  
15783  
15791  
15868  
16138  
16194  
16271  
16282  
16331  
16360  
16545  
16546  
16662  
16852  
16899  
17158  
17666  
18820  
18844  
18930

|       |       |      |      |       |      |      |      |       |
|-------|-------|------|------|-------|------|------|------|-------|
| 322   | 460   | 507  | 170  | 1     | 12   | 69   | 64   | 1015  |
| 322   | 460   | 507  | 170  | 1     | 12   | 69   | 64   | 1015  |
| 465   | 1507  | 584  | 198  | 8     | 41   | 72   | 81   | 1253  |
| 684   | 1810  | 592  | 230  | 10    | 43   | 110  | 214  | 1293  |
| 1925  | 2124  | 1406 | 311  | 49    | 77   | 184  | 302  | 1903  |
| 2073  | 2393  | 1708 | 313  | 54    | 122  | 208  | 407  | 2164  |
| 2245  | 2936  | 1713 | 319  | 56    | 155  | 215  | 442  | 2196  |
| 2683  | 3073  | 1766 | 513  | 104   | 164  | 360  | 529  | 2386  |
| 3051  | 3760  | 1843 | 518  | 162   | 168  | 413  | 659  | 3521  |
| 3125  | 3855  | 1862 | 521  | 307   | 189  | 427  | 846  | 3655  |
| 3401  | 3987  | 2051 | 874  | 437   | 193  | 433  | 991  | 3816  |
| 3472  | 4324  | 2244 | 981  | 847   | 223  | 844  | 1312 | 3932  |
| 3494  | 4783  | 2287 | 1005 | 876   | 232  | 897  | 1509 | 4926  |
| 3563  | 4800  | 2360 | 1016 | 887   | 309  | 903  | 1727 | 4943  |
| 3800  | 5494  | 2468 | 1027 | 891   | 336  | 1018 | 1883 | 5026  |
| 3875  | 6227  | 2645 | 1047 | 892   | 421  | 1094 | 2092 | 5156  |
| 3919  | 6309  | 2847 | 1051 | 918   | 425  | 1118 | 2120 | 5288  |
| 4095  | 6498  | 2853 | 1085 | 931   | 491  | 1122 | 2361 | 6390  |
| 4291  | 6847  | 3277 | 1098 | 946   | 816  | 1150 | 2529 | 6566  |
| 4494  | 7013  | 3286 | 1100 | 961   | 884  | 1193 | 2698 | 6682  |
| 4566  | 7226  | 3292 | 1121 | 966   | 914  | 1504 | 2851 | 6743  |
| 4743  | 7232  | 3301 | 1133 | 970   | 917  | 1647 | 2957 | 6809  |
| 4770  | 7708  | 3478 | 1180 | 1009  | 921  | 1750 | 3028 | 6880  |
| 4772  | 7838  | 3555 | 1225 | 1013  | 983  | 2113 | 3199 | 6883  |
| 5025  | 8973  | 3569 | 1262 | 1035  | 990  | 2558 | 3363 | 6913  |
| 5658  | 9041  | 3580 | 1290 | 1267  | 992  | 2775 | 3444 | 7159  |
| 5690  | 10058 | 3683 | 1376 | 1361  | 1041 | 2922 | 3588 | 7638  |
| 5830  | 11825 | 3685 | 1479 | 1420  | 1059 | 2975 | 3792 | 8252  |
| 6121  | 12111 | 3998 | 1534 | 1542  | 1066 | 3055 | 3862 | 8569  |
| 6305  | 14029 | 4024 | 1551 | 2343  | 1068 | 3085 | 3865 | 8740  |
| 6502  | 14125 | 4233 | 2339 | 3231  | 1074 | 3251 | 3881 | 8806  |
| 6696  | 14343 | 4403 | 2623 | 3988  | 1095 | 3675 | 4052 | 9681  |
| 7145  | 14763 | 4404 | 2730 | 5531  | 1104 | 3761 | 4475 | 10205 |
| 7407  | 15006 | 4574 | 3925 | 6407  | 1117 | 3790 | 4866 | 10434 |
| 7517  | 15451 | 4610 | 4250 | 6576  | 1126 | 3969 | 4897 | 10535 |
| 7592  | 15989 | 4665 | 4710 | 6896  | 1142 | 3986 | 4942 | 10567 |
| 8320  | 16204 | 4689 | 4756 | 7446  | 1200 | 3999 | 5058 | 10630 |
| 8481  | 16533 | 4735 | 5498 | 9100  | 1207 | 4017 | 5166 | 10676 |
| 9319  | 17309 | 4896 | 5653 | 9162  | 1226 | 4029 | 5182 | 10764 |
| 9710  | 18006 | 5024 | 5666 | 10524 | 1237 | 4164 | 5299 | 10825 |
| 9711  | 18142 | 5050 | 5667 | 11318 | 1241 | 4648 | 5353 | 10895 |
| 9829  | 18451 | 5097 | 5818 | 11588 | 1249 | 4804 | 5409 | 11046 |
| 10390 | 19128 | 5126 | 5832 | 15777 | 1257 | 4859 | 5423 | 11051 |
| 10419 |       | 5286 | 5926 | 19015 | 1272 | 4979 | 5828 | 11171 |
| 10711 |       | 5300 | 6476 |       | 1287 | 5554 | 6025 | 11262 |
| 10935 |       | 5364 | 6608 |       | 1415 | 5642 | 6177 | 11433 |
| 11199 |       | 5365 | 6638 |       | 1440 | 5844 | 6631 | 11488 |
| 11229 |       | 5419 | 7056 |       | 1487 | 6179 | 7016 | 11640 |
| 12229 |       | 5514 | 7118 |       | 1496 | 6468 | 7228 | 11729 |
| 12453 |       | 5536 | 7151 |       | 1566 | 6513 | 7239 | 11951 |
| 12546 |       | 5722 | 7214 |       | 1644 | 6593 | 7417 | 12717 |
| 12733 |       | 5744 | 7286 |       | 2416 | 6971 | 8159 | 14171 |

|       |       |       |       |       |       |       |
|-------|-------|-------|-------|-------|-------|-------|
| 12984 | 5883  | 7449  | 2453  | 7463  | 8226  | 14175 |
| 13324 | 5913  | 7451  | 2536  | 8203  | 8255  | 14206 |
| 13344 | 5936  | 7475  | 2581  | 8251  | 8327  | 14207 |
| 13894 | 6017  | 7480  | 2877  | 9590  | 8733  | 14229 |
| 14024 | 6034  | 7784  | 3090  | 9641  | 8761  | 15075 |
| 14051 | 6091  | 7833  | 3811  | 9748  | 10114 | 15149 |
| 14090 | 6149  | 8095  | 3913  | 9888  | 10150 | 15291 |
| 14348 | 6257  | 8137  | 3943  | 9959  | 10292 | 15473 |
| 14498 | 6284  | 8384  | 4283  | 9978  | 10303 | 15610 |
| 14637 | 6431  | 8442  | 4479  | 10186 | 10635 | 15836 |
| 14707 | 6519  | 8646  | 4762  | 10203 | 10647 | 16165 |
| 14869 | 6531  | 8762  | 4765  | 10268 | 10704 | 17100 |
| 15243 | 6539  | 8807  | 4792  | 10406 | 10789 | 17159 |
| 15299 | 6776  | 8808  | 4858  | 10438 | 10929 | 17561 |
| 16766 | 6822  | 8809  | 4869  | 10511 | 10995 | 17939 |
| 16794 | 6850  | 8998  | 4957  | 10583 | 11110 | 18165 |
| 16935 | 7076  | 9066  | 4999  | 10586 | 11122 | 18437 |
| 17011 | 7241  | 9130  | 5000  | 10689 | 11462 | 19097 |
| 17281 | 7651  | 9163  | 5643  | 10812 | 12223 |       |
| 17910 | 7712  | 9173  | 5796  | 10858 | 12393 |       |
| 17990 | 7791  | 9290  | 6220  | 10879 | 12516 |       |
| 18211 | 8018  | 9364  | 6693  | 10919 | 12593 |       |
|       | 8610  | 9521  | 6800  | 10928 | 12633 |       |
|       | 8845  | 9570  | 7499  | 10978 | 13215 |       |
|       | 8913  | 9700  | 9656  | 10987 | 13272 |       |
|       | 9360  | 9706  | 9958  | 11007 | 13401 |       |
|       | 9484  | 10091 | 9964  | 11015 | 13711 |       |
|       | 9796  | 10096 | 9984  | 11038 | 13870 |       |
|       | 9816  | 10212 | 10045 | 11190 | 14036 |       |
|       | 9834  | 10251 | 10088 | 11241 | 14084 |       |
|       | 10006 | 10345 | 10291 | 11459 | 14115 |       |
|       | 11379 | 10544 | 10437 | 11606 | 14143 |       |
|       | 11463 | 10669 | 10461 | 11815 | 14411 |       |
|       | 11506 | 10863 | 10530 | 11856 | 14432 |       |
|       | 11699 | 10944 | 10703 | 12142 | 14980 |       |
|       | 12253 | 11154 | 10719 | 12429 | 15122 |       |
|       | 12927 | 11356 | 10753 | 12539 | 15406 |       |
|       | 12957 | 11512 | 10869 | 12641 | 15798 |       |
|       | 13119 | 11759 | 10893 | 12655 | 16130 |       |
|       | 13135 | 11767 | 10971 | 12707 | 16493 |       |
|       | 13301 | 11837 | 10996 | 13415 | 16530 |       |
|       | 13524 | 11854 | 11040 | 13843 | 16869 |       |
|       | 13694 | 11921 | 11075 | 13912 | 16986 |       |
|       | 13719 | 12322 | 11286 | 14004 | 17218 |       |
|       | 13944 | 12839 | 11305 | 14168 | 17357 |       |
|       | 13984 | 12897 | 11516 | 14754 | 18816 |       |
|       | 14157 | 13357 | 11758 | 14771 | 19040 |       |
|       | 14427 | 13365 | 11809 | 14916 | 19103 |       |
|       | 14538 | 13377 | 11843 | 14940 |       |       |
|       | 14756 | 13444 | 11849 | 15002 |       |       |
|       | 14777 | 13575 | 11881 | 15069 |       |       |
|       | 15298 | 13696 | 12066 | 15118 |       |       |

|       |       |       |       |
|-------|-------|-------|-------|
| 15442 | 13772 | 12073 | 15821 |
| 15466 | 14129 | 12557 | 16436 |
| 15529 | 14221 | 13348 | 16558 |
| 15551 | 14449 | 13446 | 16663 |
| 15699 | 14828 | 14209 | 16717 |
| 16203 | 14900 | 14681 | 16744 |
| 16229 | 14926 | 14686 | 16781 |
| 16250 | 14934 | 14894 | 17129 |
| 16647 | 14958 | 14951 | 17918 |
| 16651 | 14959 | 15058 | 17994 |
| 16654 | 14975 | 15105 | 18138 |
| 16855 | 15053 | 16064 | 18206 |
| 16908 | 15608 | 16104 | 19104 |
| 16943 | 15734 | 16223 | 19161 |
| 16954 | 15773 | 16580 |       |
| 16959 | 15861 | 16692 |       |
| 16989 | 15864 | 18217 |       |
| 17017 | 16120 | 18288 |       |
| 17060 | 16277 |       |       |
| 17200 | 16348 |       |       |
| 17243 | 16349 |       |       |
| 17322 | 16351 |       |       |
| 17553 | 16442 |       |       |
| 18009 | 16547 |       |       |
| 18111 | 17196 |       |       |
| 18430 | 17384 |       |       |
| 18441 | 17396 |       |       |
| 18448 | 17721 |       |       |
| 18755 | 17799 |       |       |
| 18797 | 17946 |       |       |
| 18942 | 18025 |       |       |
|       | 18053 |       |       |
|       | 18118 |       |       |
|       | 18149 |       |       |
|       | 18354 |       |       |
|       | 19101 |       |       |
|       | 19158 |       |       |



| 59    | 7     | 229   | 97    | 92    | 37    | 250   | 234  | 1493  |
|-------|-------|-------|-------|-------|-------|-------|------|-------|
| 59    | 7     | 229   | 97    | 92    | 37    | 250   | 234  | 1493  |
| 269   | 11    | 414   | 348   | 241   | 1386  | 566   | 674  | 2153  |
| 873   | 356   | 1037  | 436   | 440   | 1609  | 763   | 801  | 2924  |
| 1233  | 363   | 1898  | 865   | 575   | 1785  | 790   | 1234 | 2955  |
| 1303  | 418   | 1902  | 1129  | 691   | 1823  | 1038  | 1357 | 2963  |
| 1659  | 549   | 2442  | 1140  | 1043  | 1854  | 2032  | 1858 | 3942  |
| 2045  | 1878  | 2703  | 1288  | 1330  | 2160  | 2306  | 1863 | 4552  |
| 2401  | 2060  | 2909  | 1338  | 1516  | 2675  | 2591  | 1864 | 4614  |
| 2452  | 2935  | 3218  | 1632  | 1633  | 2676  | 2655  | 1922 | 4872  |
| 2925  | 3380  | 3505  | 2421  | 1669  | 2937  | 2825  | 2237 | 4904  |
| 3182  | 3733  | 3556  | 2436  | 1836  | 2947  | 2845  | 2465 | 6140  |
| 3326  | 3771  | 4489  | 2542  | 1873  | 3475  | 2929  | 2471 | 6326  |
| 3385  | 4153  | 4763  | 3020  | 2148  | 4407  | 2999  | 2671 | 6716  |
| 3732  | 4528  | 5022  | 4192  | 2155  | 5277  | 3038  | 2752 | 7397  |
| 3793  | 4972  | 6009  | 4681  | 2466  | 5954  | 3247  | 2813 | 7506  |
| 3826  | 6542  | 6341  | 5263  | 2562  | 6706  | 3378  | 2866 | 7525  |
| 3848  | 7307  | 7074  | 5427  | 2670  | 6730  | 3462  | 3016 | 7736  |
| 3854  | 8559  | 7369  | 6734  | 3914  | 7707  | 3468  | 3058 | 7819  |
| 3900  | 8789  | 8534  | 7150  | 3981  | 8293  | 3944  | 3253 | 8883  |
| 4132  | 9947  | 8599  | 7516  | 4282  | 8693  | 4005  | 3458 | 9038  |
| 4453  | 10116 | 9639  | 8304  | 4745  | 8709  | 4296  | 3517 | 9279  |
| 4514  | 10176 | 9716  | 9442  | 4798  | 8750  | 4652  | 3746 | 13043 |
| 4930  | 10342 | 9744  | 9587  | 5659  | 10061 | 4741  | 3812 | 13733 |
| 4991  | 10377 | 9807  | 9603  | 6131  | 10352 | 4746  | 3838 | 13919 |
| 5063  | 10465 | 9831  | 9921  | 6665  | 10792 | 4870  | 3856 | 14111 |
| 5362  | 10489 | 9832  | 10265 | 7420  | 10883 | 5118  | 3863 | 14159 |
| 5571  | 10566 | 9944  | 10385 | 9032  | 11265 | 6524  | 3867 | 14241 |
| 5616  | 10594 | 10068 | 10646 | 9039  | 11503 | 6784  | 4114 | 14253 |
| 6194  | 10695 | 10319 | 10659 | 9064  | 11627 | 7319  | 4667 | 15138 |
| 6541  | 10739 | 10371 | 10768 | 9281  | 12299 | 7608  | 4921 | 15358 |
| 6911  | 10926 | 10501 | 10826 | 9305  | 12643 | 8400  | 4938 | 15708 |
| 6941  | 10994 | 10529 | 10836 | 10180 | 12978 | 8432  | 4997 | 15878 |
| 7021  | 11021 | 10536 | 10878 | 10556 | 13837 | 8770  | 5002 | 16754 |
| 7071  | 11170 | 10537 | 11053 | 10617 | 14964 | 9062  | 5066 | 17220 |
| 7665  | 11216 | 10651 | 11118 | 10765 | 15502 | 9200  | 5106 | 17471 |
| 7850  | 11404 | 10713 | 11258 | 11121 | 17185 | 9291  | 5200 | 18871 |
| 7929  | 11845 | 10839 | 11496 | 11301 | 18832 | 9803  | 5694 | 18957 |
| 8125  | 12054 | 10937 | 12181 | 11538 |       | 9975  | 5853 |       |
| 8580  | 12076 | 11003 | 12291 | 11782 |       | 10449 | 6315 |       |
| 8908  | 12210 | 11043 | 12387 | 11899 |       | 10584 | 6357 |       |
| 8979  | 12427 | 11726 | 12483 | 11937 |       | 10963 | 6714 |       |
| 9885  | 12617 | 11777 | 12650 | 12070 |       | 11169 | 7075 |       |
| 10001 | 12626 | 12113 | 13569 | 12384 |       | 12078 | 7315 |       |
| 10064 | 12671 | 12167 | 14202 | 12447 |       | 12106 | 7320 |       |
| 10166 | 13407 | 12249 | 14790 | 12451 |       | 12389 | 7421 |       |
| 10282 | 15407 | 12436 | 14915 | 12680 |       | 12425 | 7443 |       |
| 10295 | 15578 | 12480 | 15667 | 12709 |       | 12517 | 7529 |       |
| 10311 | 15756 | 12504 | 15895 | 12755 |       | 12762 | 7725 |       |
| 10448 | 15775 | 12512 | 18099 | 12791 |       | 13274 | 7908 |       |
| 10450 | 16548 | 12574 | 18794 | 12931 |       | 13851 | 8183 |       |
| 10509 | 18144 | 12646 | 18894 | 13684 |       | 13924 | 8369 |       |

|       |       |       |       |       |
|-------|-------|-------|-------|-------|
| 10558 | 12672 | 13688 | 14438 | 8519  |
| 10679 | 13325 | 14969 | 14471 | 8756  |
| 10710 | 13392 | 16212 | 14955 | 8803  |
| 10794 | 13578 | 16517 | 15294 | 8948  |
| 10800 | 13597 | 16930 | 15832 | 9475  |
| 10857 | 13970 | 18154 | 17999 | 9771  |
| 10989 | 14031 | 18243 | 18249 | 9797  |
| 11024 | 14113 | 18506 | 18890 | 9800  |
| 11651 | 14170 |       |       | 9837  |
| 11893 | 14282 |       |       | 9943  |
| 12540 | 14626 |       |       | 10264 |
| 12797 | 14897 |       |       | 10369 |
| 12940 | 14907 |       |       | 10721 |
| 13157 | 14910 |       |       | 11112 |
| 13266 | 14924 |       |       | 11300 |
| 13385 | 15088 |       |       | 11410 |
| 13653 | 15317 |       |       | 11525 |
| 14232 | 15477 |       |       | 11859 |
| 14621 | 15696 |       |       | 11879 |
| 14842 | 16197 |       |       | 12110 |
| 15076 | 16252 |       |       | 12240 |
| 15119 | 16690 |       |       | 12407 |
| 15550 | 16780 |       |       | 12470 |
| 16039 | 16982 |       |       | 12513 |
| 16076 | 17186 |       |       | 12744 |
| 16232 |       |       |       | 13506 |
| 17275 |       |       |       | 13649 |
| 17648 |       |       |       | 14027 |
| 17885 |       |       |       | 14281 |
| 18248 |       |       |       | 14526 |
| 18438 |       |       |       | 14669 |
| 18555 |       |       |       | 14731 |
| 18556 |       |       |       | 15388 |
| 18843 |       |       |       | 15806 |
| 18929 |       |       |       | 16008 |
| 19014 |       |       |       | 16077 |
|       |       |       |       | 16470 |
|       |       |       |       | 16764 |
|       |       |       |       | 16895 |
|       |       |       |       | 16993 |
|       |       |       |       | 17169 |
|       |       |       |       | 17512 |
|       |       |       |       | 18834 |

|       |      |     |     |     |       |      |       |      |
|-------|------|-----|-----|-----|-------|------|-------|------|
| 535   | 24   | 4   | 26  | 2   | 204   | 63   | 34    | 36   |
| 535   | 24   | 4   | 26  | 2   | 204   | 63   | 34    | 36   |
| 1839  | 38   | 9   | 28  | 3   | 299   | 67   | 71    | 66   |
| 2378  | 58   | 14  | 31  | 21  | 364   | 96   | 101   | 68   |
| 2476  | 80   | 16  | 32  | 23  | 533   | 121  | 140   | 74   |
| 3670  | 167  | 17  | 50  | 27  | 850   | 178  | 264   | 128  |
| 3780  | 188  | 18  | 51  | 29  | 853   | 205  | 270   | 143  |
| 4063  | 192  | 19  | 52  | 33  | 1033  | 267  | 304   | 151  |
| 4451  | 197  | 20  | 57  | 35  | 1881  | 274  | 324   | 209  |
| 4677  | 259  | 22  | 75  | 40  | 2317  | 329  | 519   | 243  |
| 4748  | 290  | 30  | 82  | 48  | 2732  | 375  | 662   | 253  |
| 4880  | 317  | 53  | 84  | 98  | 2766  | 384  | 888   | 255  |
| 4920  | 323  | 78  | 109 | 99  | 3111  | 391  | 896   | 265  |
| 4990  | 342  | 87  | 112 | 108 | 3682  | 553  | 919   | 271  |
| 4994  | 343  | 89  | 144 | 125 | 4073  | 639  | 1017  | 286  |
| 5076  | 462  | 116 | 149 | 142 | 4492  | 1010 | 1868  | 441  |
| 5077  | 574  | 131 | 185 | 145 | 4888  | 1152 | 2321  | 451  |
| 5174  | 600  | 132 | 211 | 152 | 4985  | 1269 | 2357  | 676  |
| 5511  | 678  | 134 | 284 | 173 | 5060  | 1482 | 2711  | 868  |
| 5698  | 819  | 137 | 287 | 174 | 5061  | 1563 | 3529  | 1089 |
| 5731  | 841  | 159 | 310 | 180 | 5122  | 1807 | 3650  | 1146 |
| 5887  | 842  | 165 | 350 | 182 | 5152  | 2033 | 4946  | 1149 |
| 6295  | 848  | 169 | 385 | 191 | 5327  | 2441 | 5241  | 1189 |
| 6530  | 856  | 258 | 416 | 195 | 5458  | 2642 | 5657  | 1419 |
| 6737  | 860  | 260 | 716 | 201 | 5815  | 2656 | 6580  | 1425 |
| 7325  | 864  | 359 | 724 | 203 | 6623  | 3369 | 8778  | 1819 |
| 7502  | 872  | 380 | 811 | 210 | 6651  | 3393 | 8812  | 2132 |
| 7555  | 936  | 809 | 814 | 219 | 6681  | 3680 | 9628  | 2167 |
| 7871  | 941  | 810 | 820 | 222 | 6748  | 4009 | 9655  | 2574 |
| 7960  | 973  | 812 | 823 | 295 | 6769  | 4015 | 9721  | 2590 |
| 7966  | 994  | 813 | 825 | 297 | 6825  | 4083 | 9745  | 3259 |
| 8177  | 995  | 818 | 826 | 303 | 7144  | 4217 | 9887  | 3487 |
| 8223  | 1022 | 821 | 827 | 358 | 7209  | 4323 | 10044 | 3547 |
| 8374  | 1049 | 822 | 831 | 369 | 7223  | 4370 | 10113 | 3579 |
| 8389  | 1053 | 824 | 836 | 379 | 7287  | 4577 | 10115 | 3820 |
| 8410  | 1060 | 830 | 837 | 495 | 7788  | 4624 | 10174 | 3996 |
| 9400  | 1061 | 833 | 838 | 539 | 8202  | 4969 | 10224 | 4363 |
| 9417  | 1105 | 839 | 851 | 541 | 8277  | 4986 | 10442 | 4693 |
| 9774  | 1111 | 840 | 854 | 726 | 8379  | 4995 | 10497 | 5602 |
| 10638 | 1197 | 843 | 863 | 734 | 8604  | 5084 | 10527 | 5909 |
| 10678 | 1280 | 845 | 881 | 828 | 9624  | 5295 | 10534 | 6196 |
| 11207 | 1286 | 852 | 886 | 829 | 9631  | 5429 | 10563 | 6605 |
| 11362 | 1323 | 855 | 889 | 832 | 10098 | 5545 | 10613 | 6999 |
| 11383 | 1343 | 859 | 898 | 834 | 10135 | 6679 | 10684 | 7183 |
| 12137 | 1383 | 871 | 899 | 861 | 10151 | 6912 | 10772 | 7238 |
| 13016 | 1418 | 877 | 900 | 866 | 10473 | 6968 | 10847 | 7513 |
| 13807 | 1454 | 878 | 901 | 869 | 10476 | 7233 | 10873 | 8047 |
| 14410 | 1455 | 879 | 904 | 875 | 10496 | 7272 | 10874 | 8505 |
| 14429 | 1490 | 882 | 906 | 890 | 10578 | 8134 | 10900 | 8745 |
| 14557 | 1511 | 894 | 907 | 895 | 10645 | 8275 | 10901 | 9658 |
| 14821 | 1538 | 910 | 912 | 923 | 10698 | 8430 | 10915 | 9671 |
| 14823 | 1770 | 916 | 915 | 929 | 10731 | 8560 | 10931 | 9701 |

|       |      |      |      |      |       |       |       |       |
|-------|------|------|------|------|-------|-------|-------|-------|
| 14840 | 1988 | 920  | 922  | 940  | 10912 | 8708  | 11018 | 9749  |
| 15095 | 2140 | 926  | 925  | 944  | 10916 | 8821  | 11102 | 9775  |
| 15159 | 2428 | 927  | 937  | 947  | 10920 | 9640  | 11104 | 9808  |
| 15278 | 2467 | 933  | 938  | 965  | 10968 | 9857  | 11108 | 10031 |
| 15433 | 2483 | 934  | 945  | 989  | 11026 | 9868  | 11226 | 10039 |
| 16075 | 2491 | 935  | 948  | 1008 | 11035 | 9917  | 11236 | 10073 |
| 16148 | 2521 | 939  | 949  | 1012 | 11077 | 10146 | 11420 | 10089 |
| 16168 | 2571 | 942  | 951  | 1097 | 11292 | 10272 | 11477 | 10093 |
| 16772 | 2572 | 943  | 954  | 1102 | 11650 | 10340 | 11543 | 10119 |
| 16931 | 2580 | 950  | 963  | 1132 | 12001 | 10375 | 11670 | 10144 |
| 17022 | 2887 | 952  | 967  | 1144 | 12004 | 10440 | 11694 | 10156 |
| 17025 | 3113 | 953  | 969  | 1147 | 12460 | 10446 | 11756 | 10177 |
| 17035 | 3165 | 956  | 975  | 1151 | 12569 | 10576 | 11888 | 10200 |
| 17038 | 3238 | 959  | 984  | 1158 | 12866 | 10592 | 12025 | 10233 |
| 17840 | 3484 | 964  | 985  | 1279 | 13406 | 10611 | 12083 | 10263 |
| 17856 | 3658 | 971  | 986  | 1457 | 13412 | 10620 | 12114 | 10407 |
| 17861 | 3751 | 977  | 996  | 1617 | 13686 | 10656 | 12645 | 10439 |
| 17895 | 3759 | 987  | 997  | 1649 | 13773 | 10697 | 12682 | 10474 |
| 18036 | 3808 | 998  | 1002 | 1670 | 13917 | 10707 | 12893 | 10499 |
| 18044 | 3852 | 999  | 1003 | 1909 | 13918 | 10799 | 13378 | 10528 |
| 18402 | 4047 | 1007 | 1020 | 1910 | 14201 | 10921 | 13715 | 10569 |
| 18464 | 4048 | 1024 | 1021 | 1912 | 15011 | 10939 | 14145 | 10644 |
| 19137 | 4191 | 1025 | 1031 | 2316 | 15066 | 10955 | 14173 | 10665 |
|       | 4199 | 1044 | 1032 | 2345 | 15722 | 10986 | 14319 | 10681 |
|       | 4782 | 1070 | 1045 | 2457 | 15778 | 11002 | 14345 | 10682 |
|       | 5178 | 1088 | 1065 | 2489 | 16175 | 11032 | 15072 | 10736 |
|       | 5275 | 1103 | 1090 | 2561 | 16344 | 11080 | 15534 | 10784 |
|       | 5370 | 1128 | 1112 | 2588 | 16430 | 11127 | 15580 | 10843 |
|       | 5371 | 1148 | 1115 | 2736 | 16686 | 11186 | 16489 | 10845 |
|       | 5378 | 1173 | 1124 | 3275 | 16709 | 11201 | 17590 | 10861 |
|       | 5404 | 1261 | 1145 | 3355 | 16716 | 11311 | 17735 | 10876 |
|       | 5466 | 1512 | 1153 | 3616 | 17619 | 11485 | 17758 | 10897 |
|       | 6180 | 1619 | 1159 | 3679 | 18216 | 11708 | 18610 | 10924 |
|       | 6188 | 1665 | 1162 | 3709 | 18850 | 11710 |       | 10949 |
|       | 6367 | 1681 | 1172 | 3769 |       | 11754 |       | 10950 |
|       | 6395 | 2166 | 1177 | 3830 |       | 11820 |       | 11044 |
|       | 6403 | 2283 | 1178 | 3853 |       | 11834 |       | 11098 |
|       | 6534 | 2429 | 1179 | 3872 |       | 11863 |       | 11233 |
|       | 6735 | 2475 | 1190 | 3929 |       | 12282 |       | 11251 |
|       | 6766 | 2480 | 1202 | 4030 |       | 12370 |       | 11270 |
|       | 6797 | 3498 | 1222 | 4035 |       | 12406 |       | 11271 |
|       | 6894 | 3559 | 1232 | 4042 |       | 12410 |       | 11297 |
|       | 6953 | 4040 | 1256 | 4123 |       | 12541 |       | 11363 |
|       | 6992 | 4287 | 1263 | 4507 |       | 12545 |       | 11761 |
|       | 6997 | 4311 | 1264 | 4832 |       | 12741 |       | 11916 |
|       | 7023 | 4776 | 1294 | 4850 |       | 12769 |       | 12074 |
|       | 7053 | 5016 | 1309 | 4852 |       | 13233 |       | 12134 |
|       | 7055 | 5721 | 1316 | 4860 |       | 13382 |       | 12160 |
|       | 7085 | 6522 | 1360 | 4861 |       | 13946 |       | 12312 |
|       | 7087 | 7815 | 1491 | 4881 |       | 14258 |       | 12416 |
|       | 7181 | 8634 | 1532 | 4889 |       | 14404 |       | 12417 |
|       | 7201 | 8713 | 2647 | 4916 |       | 14739 |       | 12418 |

|       |       |       |       |       |       |
|-------|-------|-------|-------|-------|-------|
| 7246  | 8909  | 2739  | 4941  | 15060 | 12485 |
| 7332  | 9047  | 3488  | 4948  | 15085 | 12502 |
| 7344  | 9152  | 3681  | 4974  | 15443 | 12523 |
| 7348  | 9378  | 3704  | 4975  | 15637 | 12759 |
| 7386  | 9451  | 3962  | 4976  | 15695 | 14006 |
| 7438  | 9657  | 4234  | 5005  | 15705 | 14865 |
| 7576  | 9746  | 4682  | 5006  | 15802 | 15151 |
| 7607  | 10475 | 4774  | 5059  | 16087 | 15378 |
| 7640  | 10488 | 4918  | 5119  | 16383 | 15444 |
| 7704  | 10491 | 4945  | 5150  | 16483 | 15866 |
| 7706  | 10523 | 5004  | 5264  | 16948 |       |
| 7799  | 10533 | 5319  | 5267  | 17882 |       |
| 7807  | 10899 | 5432  | 5296  | 18584 |       |
| 7839  | 10914 | 5897  | 5303  |       |       |
| 7919  | 10990 | 6054  | 5324  |       |       |
| 7988  | 12548 | 6536  | 5380  |       |       |
| 7994  | 13767 | 6636  | 5386  |       |       |
| 8099  | 14174 | 6640  | 5407  |       |       |
| 8112  | 14769 | 7416  | 5414  |       |       |
| 8153  | 14778 | 8278  | 5692  |       |       |
| 8499  | 15924 | 8596  | 6471  |       |       |
| 8552  | 16378 | 8785  | 6564  |       |       |
| 8663  | 16633 | 9051  | 6622  |       |       |
| 8695  | 18410 | 9695  | 6678  |       |       |
| 8758  | 19012 | 9977  | 6914  |       |       |
| 8759  |       | 10137 | 6942  |       |       |
| 8863  |       | 10169 | 6951  |       |       |
| 8938  |       | 10445 | 6982  |       |       |
| 8941  |       | 10487 | 7057  |       |       |
| 9016  |       | 10490 | 7115  |       |       |
| 9099  |       | 10495 | 7261  |       |       |
| 9164  |       | 10677 | 7447  |       |       |
| 9196  |       | 10725 | 8200  |       |       |
| 9227  |       | 10779 | 8228  |       |       |
| 9229  |       | 10933 | 8230  |       |       |
| 9322  |       | 10934 | 8232  |       |       |
| 9330  |       | 10975 | 8250  |       |       |
| 9354  |       | 10991 | 8300  |       |       |
| 9356  |       | 10998 | 8480  |       |       |
| 9394  |       | 11048 | 8555  |       |       |
| 9485  |       | 11056 | 8579  |       |       |
| 9573  |       | 11242 | 8633  |       |       |
| 9579  |       | 11765 | 8688  |       |       |
| 9618  |       | 11850 | 8710  |       |       |
| 9666  |       | 11941 | 8784  |       |       |
| 9714  |       | 12079 | 9310  |       |       |
| 9718  |       | 12158 | 9858  |       |       |
| 9863  |       | 12191 | 10095 |       |       |
| 10021 |       | 12509 | 10274 |       |       |
| 10032 |       | 12564 | 10329 |       |       |
| 10041 |       | 12597 | 10411 |       |       |
| 10094 |       | 13801 | 10464 |       |       |

|       |       |       |
|-------|-------|-------|
| 10129 | 13923 | 10469 |
| 10133 | 14288 | 10470 |
| 10145 | 15055 | 10471 |
| 10149 | 15111 | 10472 |
| 10153 | 15781 | 10502 |
| 10157 | 16284 | 10505 |
| 10189 | 16722 | 10531 |
| 10261 | 16723 | 10551 |
| 10285 | 18103 | 10559 |
| 10324 |       | 10685 |
| 10504 |       | 10759 |
| 10512 |       | 10762 |
| 10548 |       | 10840 |
| 10552 |       | 10856 |
| 10661 |       | 10885 |
| 10705 |       | 10966 |
| 10744 |       | 11005 |
| 10835 |       | 11034 |
| 10938 |       | 11069 |
| 10946 |       | 11073 |
| 10954 |       | 11079 |
| 10958 |       | 11187 |
| 10962 |       | 11273 |
| 11009 |       | 11287 |
| 11025 |       | 11493 |
| 11074 |       | 11764 |
| 11082 |       | 11861 |
| 11141 |       | 12319 |
| 11324 |       | 12385 |
| 11348 |       | 12510 |
| 11548 |       | 12556 |
| 11613 |       | 12595 |
| 11629 |       | 12596 |
| 11636 |       | 12683 |
| 11747 |       | 13434 |
| 11751 |       | 13479 |
| 11755 |       | 13744 |
| 11763 |       | 13774 |
| 11833 |       | 14061 |
| 11835 |       | 14073 |
| 11867 |       | 14093 |
| 11883 |       | 14200 |
| 11969 |       | 14289 |
| 12129 |       | 14375 |
| 12130 |       | 14445 |
| 12146 |       | 16260 |
| 12150 |       | 16666 |
| 12310 |       | 17504 |
| 12544 |       | 17532 |
| 12552 |       | 18011 |
| 12560 |       | 18086 |
| 12568 |       | 18283 |

12572  
12600  
12751  
12934  
13226  
13261  
13373  
13417  
13424  
13432  
13464  
13477  
13542  
13732  
13768  
13976  
14101  
14154  
14178  
14182  
14184  
14486  
14780  
14788  
14898  
14967  
15333  
15759  
15763  
15789  
15840  
16095  
16202  
16215  
16286  
16287  
16316  
16318  
16319  
16391  
16399  
16462  
16519  
16523  
16577  
16601  
16603  
16632  
17197  
18051  
18225  
18458

18639  
18796



| 13    | 5    | 237   | 235   | 226  | 242  | 207   | 88   |
|-------|------|-------|-------|------|------|-------|------|
| 13    | 5    | 237   | 235   | 226  | 242  | 207   | 88   |
| 62    | 42   | 272   | 559   | 254  | 252  | 236   | 246  |
| 115   | 70   | 958   | 562   | 263  | 355  | 365   | 382  |
| 147   | 93   | 1055  | 745   | 467  | 671  | 1932  | 389  |
| 158   | 130  | 1071  | 902   | 556  | 687  | 2526  | 432  |
| 331   | 146  | 1260  | 978   | 561  | 713  | 2630  | 439  |
| 526   | 153  | 1282  | 1052  | 722  | 835  | 3244  | 503  |
| 720   | 161  | 1394  | 1063  | 733  | 1056 | 3245  | 577  |
| 982   | 171  | 1564  | 1064  | 741  | 1220 | 3496  | 648  |
| 1087  | 181  | 1671  | 1069  | 1036 | 1812 | 3691  | 1014 |
| 1333  | 239  | 1870  | 1216  | 1214 | 1834 | 4102  | 1086 |
| 1522  | 244  | 1906  | 1245  | 1352 | 1861 | 4278  | 1814 |
| 1625  | 245  | 2039  | 1395  | 1684 | 2146 | 4635  | 1871 |
| 1844  | 273  | 2097  | 1700  | 1693 | 2161 | 4664  | 2046 |
| 2129  | 279  | 2103  | 2182  | 1698 | 2256 | 4905  | 2064 |
| 2335  | 280  | 2104  | 2499  | 1740 | 2332 | 5020  | 2122 |
| 2455  | 293  | 2130  | 2500  | 1754 | 2541 | 5525  | 2185 |
| 3288  | 438  | 2482  | 2501  | 1811 | 2592 | 5777  | 2477 |
| 3315  | 444  | 2497  | 2564  | 1840 | 2624 | 5894  | 2681 |
| 3351  | 469  | 2559  | 2834  | 1860 | 2810 | 6296  | 2812 |
| 4806  | 482  | 2669  | 3033  | 1865 | 2971 | 6710  | 3068 |
| 4822  | 497  | 2680  | 3300  | 1874 | 3041 | 6715  | 3112 |
| 4882  | 680  | 4827  | 3448  | 1946 | 3123 | 6858  | 3133 |
| 4939  | 781  | 5095  | 3480  | 1985 | 3196 | 7158  | 3278 |
| 5544  | 802  | 6417  | 3775  | 2134 | 3284 | 7494  | 3293 |
| 5582  | 862  | 6426  | 4280  | 2198 | 3371 | 7541  | 3454 |
| 6221  | 893  | 6722  | 4294  | 2222 | 3373 | 7671  | 3464 |
| 6423  | 955  | 7823  | 4886  | 2314 | 3419 | 8054  | 3476 |
| 6670  | 979  | 8050  | 5021  | 2474 | 3489 | 8402  | 3741 |
| 8031  | 1011 | 8611  | 5145  | 2487 | 3785 | 9112  | 3749 |
| 8322  | 1039 | 8831  | 5175  | 2619 | 3924 | 9604  | 3772 |
| 8767  | 1040 | 9625  | 5399  | 2639 | 3989 | 10005 | 3801 |
| 9191  | 1042 | 9805  | 5574  | 2648 | 4104 | 10624 | 3809 |
| 9623  | 1127 | 10074 | 5810  | 2651 | 4183 | 12192 | 3906 |
| 9826  | 1134 | 10171 | 5925  | 2664 | 4196 | 12734 | 4243 |
| 9946  | 1250 | 10173 | 6686  | 2674 | 4277 | 13214 | 4264 |
| 10003 | 1266 | 10540 | 7064  | 2763 | 4421 | 13268 | 4286 |
| 10008 | 1481 | 10640 | 7208  | 2913 | 4876 | 13860 | 4330 |
| 10384 | 1627 | 10775 | 7556  | 2966 | 4998 | 14641 | 4582 |
| 10479 | 1673 | 10797 | 7604  | 3255 | 5028 | 14732 | 4590 |
| 10805 | 1696 | 10818 | 7730  | 3570 | 5067 | 15109 | 4617 |
| 10838 | 1755 | 10909 | 8115  | 3610 | 5103 | 15865 | 4618 |
| 10855 | 1778 | 11070 | 8600  | 3915 | 5113 | 16198 | 4628 |
| 10862 | 1813 | 11100 | 9023  | 3979 | 5201 | 16221 | 4647 |
| 10925 | 1930 | 11227 | 9167  | 4032 | 5244 | 16464 | 4864 |
| 10940 | 2418 | 11266 | 9194  | 4279 | 5547 | 17704 | 5223 |
| 11078 | 2677 | 11291 | 10060 | 4288 | 5836 | 18024 | 5316 |
| 11103 | 2704 | 11357 | 10259 | 4299 | 5865 | 18095 | 5360 |
| 11253 | 2709 | 11449 | 10358 | 4585 | 5896 |       | 5465 |
| 11263 | 2820 | 12097 | 10415 | 4658 | 6136 |       | 5515 |
| 11323 | 3049 | 12098 | 10691 | 4716 | 6613 |       | 5682 |

|       |       |       |       |       |       |      |
|-------|-------|-------|-------|-------|-------|------|
| 11711 | 3263  | 12239 | 10732 | 4755  | 6671  | 5706 |
| 11968 | 3492  | 12367 | 10769 | 4775  | 6723  | 5707 |
| 11972 | 3544  | 12676 | 10837 | 4911  | 6731  | 5719 |
| 11996 | 3562  | 13565 | 10896 | 4934  | 6793  | 5763 |
| 12220 | 3817  | 13685 | 10903 | 4963  | 7113  | 5774 |
| 12316 | 3961  | 13716 | 10905 | 4971  | 7217  | 5792 |
| 12420 | 4293  | 14374 | 10930 | 5001  | 7481  | 5831 |
| 12449 | 4335  | 15638 | 10965 | 5029  | 7485  | 5834 |
| 12491 | 4393  | 16953 | 11047 | 5038  | 7505  | 5862 |
| 12525 | 4396  |       | 11062 | 5096  | 7520  | 5874 |
| 12712 | 5444  |       | 11139 | 5186  | 7538  | 5899 |
| 13125 | 7429  |       | 11214 | 5394  | 8488  | 5905 |
| 13466 | 7532  |       | 11224 | 5576  | 8635  | 5906 |
| 14057 | 8127  |       | 12055 | 5598  | 9799  | 5933 |
| 14260 | 8191  |       | 12227 | 5893  | 9889  | 6015 |
| 15748 | 8321  |       | 12296 | 6072  | 9919  | 6018 |
| 16005 | 8448  |       | 12463 | 6286  | 9974  | 6032 |
| 16167 | 8498  |       | 12511 | 6339  | 10141 | 6041 |
| 16576 | 9009  |       | 12581 | 6732  | 10253 | 6067 |
| 17502 | 9046  |       | 12706 | 6739  | 10348 | 6246 |
| 17630 | 9048  |       | 12722 | 7524  | 10480 | 6255 |
| 18728 | 9107  |       | 12799 | 7540  | 10564 | 6263 |
|       | 9261  |       | 13418 | 7900  | 10652 | 6278 |
|       | 9338  |       | 13651 | 8532  | 10733 | 6280 |
|       | 9685  |       | 14028 | 8714  | 10788 | 6303 |
|       | 9742  |       | 14053 | 9448  | 10864 | 6368 |
|       | 9838  |       | 14673 | 9683  | 10983 | 6394 |
|       | 9855  |       | 15062 | 10029 | 11081 | 6459 |
|       | 10043 |       | 15089 | 10244 | 11294 | 6467 |
|       | 10063 |       | 15155 | 10262 | 11321 | 6515 |
|       | 10066 |       | 15889 | 10344 | 11352 | 6517 |
|       | 10120 |       |       | 10560 | 11563 | 6532 |
|       | 10266 |       |       | 10565 | 11955 | 6609 |
|       | 10321 |       |       | 10616 | 11990 | 6648 |
|       | 10392 |       |       | 10619 | 12162 | 6649 |
|       | 10466 |       |       | 10653 | 12230 | 6695 |
|       | 10467 |       |       | 10670 | 12259 | 6718 |
|       | 10554 |       |       | 10741 | 12285 | 6720 |
|       | 10702 |       |       | 10821 | 12486 | 6846 |
|       | 10708 |       |       | 10866 | 12534 | 6935 |
|       | 10751 |       |       | 10872 | 12688 | 7104 |
|       | 10756 |       |       | 11071 | 13331 | 7114 |
|       | 10760 |       |       | 11167 | 13335 | 7135 |
|       | 10809 |       |       | 11217 | 13792 | 7260 |
|       | 10814 |       |       | 11325 | 13823 | 7329 |
|       | 10822 |       |       | 11329 | 13865 | 7341 |
|       | 10875 |       |       | 11386 | 13915 | 7493 |
|       | 10927 |       |       | 11703 | 13931 | 7509 |
|       | 10960 |       |       | 12095 | 14015 | 7534 |
|       | 10977 |       |       | 12103 | 14065 | 7601 |
|       | 10985 |       |       | 12243 | 14310 | 7612 |
|       | 11004 |       |       | 12450 | 14403 | 7683 |

|       |       |       |       |
|-------|-------|-------|-------|
| 11042 | 12465 | 14515 | 7729  |
| 11119 | 12479 | 14640 | 7834  |
| 11165 | 12514 | 14870 | 7840  |
| 11203 | 12770 | 15272 | 7864  |
| 11221 | 12943 | 15615 | 7890  |
| 11225 | 13416 | 15896 | 7928  |
| 11390 | 13831 | 16537 | 7945  |
| 11541 | 13853 | 16676 | 8094  |
| 12161 | 14091 | 16861 | 8194  |
| 12686 | 14146 | 17089 | 8205  |
| 12798 | 14308 | 17717 | 8290  |
| 12826 | 14463 | 18021 | 8455  |
| 13450 | 14548 |       | 8594  |
| 13798 | 14772 |       | 8597  |
| 13861 | 14948 |       | 8631  |
| 14055 | 14971 |       | 8653  |
| 15093 | 15218 |       | 8875  |
| 16124 | 15673 |       | 9000  |
| 16460 | 15957 |       | 9002  |
| 16795 | 16137 |       | 9029  |
| 16900 | 16669 |       | 9037  |
|       | 17954 |       | 9045  |
|       | 18043 |       | 9363  |
|       |       |       | 9413  |
|       |       |       | 9483  |
|       |       |       | 9499  |
|       |       |       | 9502  |
|       |       |       | 9586  |
|       |       |       | 9824  |
|       |       |       | 9840  |
|       |       |       | 9915  |
|       |       |       | 10622 |
|       |       |       | 10844 |
|       |       |       | 11166 |
|       |       |       | 11406 |
|       |       |       | 11428 |
|       |       |       | 11442 |
|       |       |       | 11444 |
|       |       |       | 11633 |
|       |       |       | 12075 |
|       |       |       | 12108 |
|       |       |       | 12127 |
|       |       |       | 12139 |
|       |       |       | 12198 |
|       |       |       | 12232 |
|       |       |       | 12248 |
|       |       |       | 12250 |
|       |       |       | 12579 |
|       |       |       | 12654 |
|       |       |       | 12760 |
|       |       |       | 12795 |
|       |       |       | 12887 |

13006  
13010  
13054  
13105  
13475  
13557  
13741  
13808  
13816  
13821  
13824  
13826  
13871  
13890  
13896  
13966  
13971  
14118  
14378  
14519  
14549  
14569  
14610  
14620  
14639  
14664  
14725  
14744  
14762  
14795  
14847  
14876  
14901  
15024  
15038  
15208  
15286  
15376  
15422  
15431  
15445  
15530  
15670  
16114  
16134  
16160  
16170  
16248  
16257  
16334  
16373  
16432

16497  
16966  
16990  
17001  
17020  
17111  
17592  
17600  
17708  
17714  
17814  
17818  
17823  
17836  
17875  
17891  
17982  
18100  
18296  
18384  
18476  
18498  
18612  
18628  
18679  
18688  
18769  
18783
